# Supplementary material for: Validation of a non-invasive method for the early detection of metabolic syndrome: a diagnostic accuracy test in a working population
Source: PubMed Central journal article supplement — BMJ Open. 2018 Oct 21;8(10):e020476. doi: 10.1136/bmjopen-2017-020476 (PMC6196859; doi:10.1136/bmjopen-2017-020476), 2018-10-21

# BMJ Open

BMJ Open is committed to open peer review. As part of this commitment we make the peer review history of every article we publish publicly available.

When an article is published we post the peer reviewers' comments and the authors' responses online. We also post the versions of the paper that were used during peer review. These are the versions that the peer review comments apply to.

The versions of the paper that follow are the versions that were submitted during the peer review process. They are not the versions of record or the final published versions. They should not be cited or distributed as the published version of this manuscript.

BMJ Open is an open access journal and the full, final, typeset and author-corrected version of record of the manuscript is available on our site with no access controls, subscription charges or pay-per-view fees (<http://bmjopen.bmj.com>).

If you have any questions on BMJ Open's open peer review process please email [info.bmjopen@bmj.com](mailto:info.bmjopen@bmj.com)

# BMJ Open

## Reproducibility and validity of a non-invasive method for the early detection of metabolic syndrome in a working population

|                                 |                                                                                                                                                                                                                                                                                                                                                                                                                                                                                                                                                                                                                                                                                                                                                                                                                                                                                               |
|---------------------------------|-----------------------------------------------------------------------------------------------------------------------------------------------------------------------------------------------------------------------------------------------------------------------------------------------------------------------------------------------------------------------------------------------------------------------------------------------------------------------------------------------------------------------------------------------------------------------------------------------------------------------------------------------------------------------------------------------------------------------------------------------------------------------------------------------------------------------------------------------------------------------------------------------|
| Journal:                        | <i>BMJ Open</i>                                                                                                                                                                                                                                                                                                                                                                                                                                                                                                                                                                                                                                                                                                                                                                                                                                                                               |
| Manuscript ID                   | bmjopen-2017-020476                                                                                                                                                                                                                                                                                                                                                                                                                                                                                                                                                                                                                                                                                                                                                                                                                                                                           |
| Article Type:                   | Research                                                                                                                                                                                                                                                                                                                                                                                                                                                                                                                                                                                                                                                                                                                                                                                                                                                                                      |
| Date Submitted by the Author:   | 13-Nov-2017                                                                                                                                                                                                                                                                                                                                                                                                                                                                                                                                                                                                                                                                                                                                                                                                                                                                                   |
| Complete List of Authors:       | ROMERO-SALDAÑA, MANUEL; Safety and Occupational Health Tauler, Pedro; Univ Balearic Isl, Fundamental Biology and Health Sciences Vaquero-Abellán, Manuel; University of Córdoba, Department of Occupational Risk Prevention and Environmental Protection López-González, Angel-Arturo; Balearic Islands Health Service, Prevention of Occupational Risks in Health Services Fuentes-Jiménez, Francisco-José; Instituto Maimonides de Investigacion Biomedica de Cordoba, Unid of Lipids Aguiló, Antoni; University of the Balearic Islands, Research Group on Evidence, Lifestyles & Health Álvarez-Fernández, Carlos; City Hall, Córdoba, Department of Occupational Safety and Health Molina-Recio, Guillermo; Univeristy of Córdoba, Department of Nursing, School of Medicine and Nursing Bennasar-Veny, Miquel; University of the Balearic Islands, Nursing and Physiotherapy Department |
| <b>Primary Subject Heading</b>: | Occupational and environmental medicine                                                                                                                                                                                                                                                                                                                                                                                                                                                                                                                                                                                                                                                                                                                                                                                                                                                       |
| Secondary Subject Heading:      | Cardiovascular medicine, Diagnostics, Epidemiology, Public health                                                                                                                                                                                                                                                                                                                                                                                                                                                                                                                                                                                                                                                                                                                                                                                                                             |
| Keywords:                       | metabolic syndrome, early detection, non invasive method, cardiovascular risk, working population                                                                                                                                                                                                                                                                                                                                                                                                                                                                                                                                                                                                                                                                                                                                                                                             |
|                                 |                                                                                                                                                                                                                                                                                                                                                                                                                                                                                                                                                                                                                                                                                                                                                                                                                                                                                               |

SCHOLARONE™  
Manuscripts

1  
2  
3 **Reproducibility and validity of a non-invasive method for the early**  
4 **detection of metabolic syndrome in a working population**  
5  
6  
7

8  
9 **Authors**

10 Manuel Romero-Saldaña<sup>1</sup>, Pedro Tauler<sup>2\*</sup>, Manuel Vaquero-Abellán<sup>3</sup>, Angel  
11 A. Lopez-Gonzalez<sup>4</sup>, Francisco José Fuentes-Jiménez<sup>5,6</sup>, Antoni Aguilo<sup>7</sup>,  
12 Carlos Álvarez-Fernández<sup>1</sup>, Guillermo Molina-Recio<sup>8</sup>, Miquel Bennasar-  
13 Veny<sup>7</sup>  
14  
15

16 **1** Department of Occupational Safety and Health, Córdoba City Hall, Córdoba, Spain

17 **2** Department of Fundamental Biology and Health Sciences, University of the  
18 Balearic Islands, Palma, Spain,  
19

20 **3** Department of Occupational Risk Prevention and Environmental Protection,  
21 University of Córdoba, Spain  
22

23 **4** Prevention of Occupational Risks in Health Services, Balearic Islands Health  
24 Service, Palma, Spain  
25

26 **5** IMIBIC, Reina Sofía University Hospital, University of Córdoba, Córdoba, Spain  
27

28 **6** CIBER Physiopathology of Obesity and Nutrition CIBEROBN, ISCIII, Madrid, Spain  
29

30 **7** Research Group on Evidence, Lifestyles & Health, University of the Balearic  
31 Islands, Palma, Spain  
32

33 **8** Department of Nursing, School of Medicine and Nursing, University of Córdoba,  
34 Spain  
35

36  
37 **\*Corresponding author:** E-mail: [pedro.tauler@uib.es](mailto:pedro.tauler@uib.es) Phone: +34 971 259960  
38  
39

40  
41  
42 **Keywords:** metabolic syndrome; early detection; non-invasive method;  
43 cardiovascular risk; working population  
44  
45

46  
47  
48 Word count (excluding title page, abstract, references, figures and tables): 4,245  
49  
50

## ABSTRACT

**Objectives.** A non-invasive method for the early detection of Metabolic Syndrome (NIN-MetS) using only Waist to Height Ratio (WHtR) and Blood Pressure (BP) has recently been published, with fixed cut-off values for gender and age. The aim of this study was to reproduce and validate this method in a large sample of Spanish workers.

**Desing.** We carried on a cross-sectional study to assessment the reproducibility and a diagnostic test accuracy to assessment the validity.

**Setting.** Occupational Health Sevices and working population.

**Participants.** The studies were conducted in 2012-2016 on a sample of 60,799 workers from the Balearic Islands (Spain).

**Interventions.** The NCEP-ATPIII criteria were used. NIM-MetS has been devised using classification trees (the CHAID, Chi-squared Automatic Interaction Detection method).

**Main outcome measures.** Anthropometric and biochemical variables to diagnostic MetS. To measure the accuracy of the diagnostic test the sensitivity, specificity, validity index and Youden Index were analysed.

**Results.** As regards the validity of the method, the sensitivity was 59.7%, specificity 94.9% and validity index 91.2%. The cut-off value for WHtR obtained was 0.544 for the total sample, and by age group, ranged from 0.514 (lower age group) and 0.563 (higher). As for the reproducibility of the method, the variables more closely associated with MetS WHtR (AUC=0.85 CI 95% 0.84-0.86) and Systolic Blood Pressure (AUC=0.79 CI 95% 0.78-0.8). The final cut-off values for the non-invasive method were WHtR $\geq$ 0.558 and BP $\geq$ 128/80 mmHg, which includes four levels of risk of MetS (very low, low, moderate and high).

**Conclusions.** The analysed method has shown a validity high validity index (greater than 91%) for the early detection of MetS. It is a non-invasive method which is easy to apply and interpret in any health care setting. This method

1  
2  
3 provides a scale of MetS risk which allows for more accurate detection and more  
4  
5 effective intervention.  
6

### 7 **Strengths and limitations of this study**

- 8 • The NIN-MetS has proved to be a valid method for the early detection of  
9 MetS in a healthy worker population.  
10
- 11 • It is a simple, economical and quick non-invasive test which is easy to apply  
12 and interpret in any health care setting (primary health care, hospitals,  
13 occupational health) as well as in other settings (education, sport, etc.).  
14
- 15 • The NIM-MetS obtains a very high specificity (94.9%) and diagnostic validity  
16 (91.2%) and provides a gradient or risk scale which allows a more accurate  
17 and earlier detection of CVD in subjects with risk of MetS.  
18
- 19 • WHtR is the best predictor of MetS and its cut-off point can be used for both  
20 genders and for different age groups.  
21
- 22 • NIM-MetS has shown lower sensitivity than the original method is likely due to  
23 differences in study populations.  
24  
25  
26  
27  
28  
29  
30  
31  
32  
33  
34  
35  
36  
37  
38  
39  
40  
41  
42  
43  
44  
45  
46  
47  
48  
49  
50  
51  
52  
53  
54  
55  
56  
57  
58  
59  
60

## INTRODUCTION

The obesity epidemic which currently affects the world population has resulted in a general increase in the prevalence of metabolic syndrome (MetS) [1-3]. Overweight and obesity are factors related to the onset of type 2 diabetes, hypertension, dyslipidemia and cardiovascular diseases (CVD). In particular, central obesity, which is defined as an excessive accumulation of abdominal fat, is an important predictor of cardiovascular risk and MetS [4, 5]. Metabolic syndrome is defined as a pluripathological state characterized by the joint presence of several cardiovascular risk factors such as abdominal obesity, high blood pressure and altered glucose and lipid metabolism (low HDL-cholesterol and high triglycerides) [6].

Although there are several analytical/instrumental techniques for measuring the amount and distribution of body fat, there is no consensus about which the ideal method to calculate central adiposity is, nor how to decide which cut-off points provide greater accuracy, efficiency, sensitivity and specificity in all cases [7, 8].

A simple and inexpensive alternative to these instruments as a way of quantifying abdominal fat is to make anthropometric measurements of central obesity [9]. Waist circumference (WC), body mass index (BMI), waist to height ratio (WHtR), waist to hip ratio (WHR), hip to height ratio (HHR), body adiposity index (BAI), visceral adiposity index (VAI), body shape index (ABSI) and percentage of body fat (%BF) are some examples that can be found in numerous epidemiological studies, in which they try to relate indirectly intra-abdominal (visceral) fat with parameters such as morbidity and mortality, and also with prevalence of hypertension, diabetes, MetS, etc. [10-13].

Since the mid-1990s, the WHtR has been the most widely used anthropometric indicator and the one which has obtained the best predictive results for cardiovascular risk [14]. In a previous publication, a non-invasive method for early detection of MetS (NIM-MetS) using only two anthropometric variables (WHtR and blood pressure (BP)) has been proposed and validated [15]. This method suggests

1  
2  
3 WHtR $\geq$ 0.55 as the predictive threshold for the early detection of MetS for both men  
4 and women and, also, for any age stratum.  
5

6 The aim of this study is to reproduce and validate the NIM-Mets method in a  
7 large representative sample of Spanish workers, to determine its predictive ability  
8 and to find out the stability of the cut-off value of WHtR $\geq$ 0.55 by gender and age.  
9  
10  
11  
12  
13  
14  
15  
16  
17  
18  
19  
20  
21  
22  
23  
24  
25  
26  
27  
28  
29  
30  
31  
32  
33  
34  
35  
36  
37  
38  
39  
40  
41  
42  
43  
44  
45  
46  
47  
48  
49  
50  
51  
52  
53  
54  
55  
56  
57  
58  
59  
60

## MATERIAL AND METHODS

### *Design and sample*

A double epidemiological study was carried out:

1. A cross-sectional study conducted on a working population from the Balearic Islands (Spain) during the period 2011-2015. The mid-term active population of workers was 621,600. Subjects participating in the study were randomly selected during their work health periodic assessments. Every day, each worker was assigned a number and half of the examined workers were randomly selected using a random number table. A total of 69,581 workers were invited to participate in the study. However, 8,782 (12.6%) refused to participate and, thus, the final number of participants was 60,799 (57.3% males and 42.7% females), aged 20 to 70 years old (10.2% of the active population) and belonging to different economic sectors (public administration, health services, etc.). The accuracy obtained with this sample was 0.23%, with a reference population of 621,600 individuals, a security rate of 95% and an expected prevalence of MetS of 10%.
2. A study of diagnostic tests was conducted in 2016 and carried out on the same sample of the cross-sectional study in order to validate the NIM-MetS method for screening for MetS in a healthy population. To determine the sample size, the following indicators were used: 95% expected specificity, 10% prevalence of MetS, 95% confidence and 0.2% accuracy. The sample size obtained was 50,687 workers.

Participants were informed of the purpose of the study before they provided written informed consent to participate. The study protocol complied with the Declaration of Helsinki for conducting medical research involving human subjects, and was approved by the Institutional Review Board of the Mallorca Health Management Ethical Review Committee of GESMA.



### *Data collection and definition of variables*

To carry out the anthropometric measurements, recommendations contained in the manual "International Standards for Anthropometric Assessment (ISAK)" were followed [16]. All the measurements were made by specifically trained staff in order to minimize the variation coefficients. Each measurement was performed three times, taking the average as the final value.

The independent variables were classified into the following categories:

- a) Personal and health habits: gender, age and tobacco consumption.
- b) Anthropometric measurements:
  - Waist circumference (WC) in cm.
  - Body mass index (BMI), calculated as body weight (kg) divided by height (m) squared, in Kg/m<sup>2</sup>.
  - Percentage of body fat (%BF), calculated according to the Deurenberg equation: %BF = 1.2x(BMI) + 0.23x(Age in years) - 10.8x(Gender) - 5.4.  
Gender: females (0), males (1)
  - Waist-to-height ratio (WHtR), calculated as waist circumference divided by height, both in cm.
  - Body shape index (ABSI), calculated as  $WC/[(BMI)^{2/3}(height)^{1/2}]$ .
- c) Blood measurements:
  - Systolic blood pressure (SBP) in mm Hg.
  - Diastolic blood pressure (DBP) in mm Hg.
  - Total Cholesterol (mg/dL), LDL-Cholesterol (mg/dL), HDL-Cholesterol (mg/dL), glucose (mg/dL) and triglycerides (mg/dL).

Body weight was measured to the nearest 0.1 kg with an electronic scale (Seca 700 scale, Seca GmbH, Hamburg). Height was measured to the nearest 0.5 cm with a stadiometer (Seca 220 (CM) Telescopic Height Rod for Column Scales, Seca GmbH, Hamburg). Waist circumference was measured half-way between the lower costal border and the iliac crest. The measurement was taken at the end of a

1  
2  
3 normal expiration with the subject standing up, with their feet together and their  
4 arms hanging down by their sides.  
5

6 Venous blood samples were taken from the antecubital vein in suitable  
7 vacutainers without anticoagulant in order to obtain serum. The blood samples  
8 were taken after a 12 h overnight fast. Participants sat and rested for at least 15  
9 minutes before the blood samples were taken. Serum was obtained after  
10 centrifugation (15 min, 1,000xg, 4°C) of the blood samples. The serum was stored  
11 at -20°C and analyses were performed within 3 days. Concentrations of glucose,  
12 cholesterol and triglycerides were measured in serum following the standard  
13 procedures used in clinical biochemistry laboratories with an autoanalyser  
14 (SYNCHRON CXH9 PRO, Beckman Coulter, Brea, CA, USA).  
15  
16  
17  
18  
19  
20  
21  
22

23 Blood pressure was determined after the subjects had rested in the supine  
24 position for 10 minutes, using an automatic and calibrated sphygmomanometer  
25 (OMRON M3, OMRON Healthcare Europe, Spain). As in the case of the  
26 anthropometrical measurements, blood pressure was measured three times,  
27 leaving a one-minute gap between each measurement, and the average value was  
28 then calculated.  
29  
30  
31  
32  
33  
34

35 Presence of MetS was ascertained by using the criterion suggested by the  
36 NCEP-ATPIII definition (when 3 of 5 of the following characteristics are present, a  
37 diagnosis of metabolic syndrome can be made):  
38  
39  
40

- 41 • Abdominal obesity (WC $\geq$ 102 cm in males and WC  $\geq$ 88 cm in females).
- 42 • Triglycerides  $\geq$ 150 mg/dL.
- 43 • HDL-cholesterol <40 mg/dL in males and <50 mg/dL in females.
- 44 • Blood pressure  $\geq$ 130/85 mm Hg.
- 45 • Fasting glucose  $\geq$ 100 mg/dL.
- 46  
47  
48  
49  
50

51 *Non-invasive method for the early detection of Mets (NIM-Mets)*  
52

53 NIM-Mets is a new tool for screening for MetS based on the following  
54 anthropometric variables and cut-off values: WHtR $\geq$ 0.55 and BP $\geq$ 128/85 mm Hg.  
55  
56  
57  
58  
59  
60

1  
2  
3 This method classifies the population into two groups with different levels of risk:

- 4 • Workers with high risk of MetS (probability >61.7%): this group would  
5 contain those subjects with both positive variables, i.e. WHtR  $\geq$  0.55 and  
6 BP  $\geq$  128/85 mm Hg.  
7
- 8 • Workers with low risk of MetS (probability of 0.5-16.9%): this group would  
9 contain those subjects who have any of the other possible combinations  
10 between the two variables considered.  
11  
12  
13  
14  
15

### 16 Statistical Analysis

17 The quantitative variables were presented with a 95% mean and confidence  
18 interval and the qualitative ones with absolute frequency and percentage. To test  
19 the goodness of fit, the Kolmogorov-Smirnov test was applied to a normal  
20 distribution of the data with the Lilliefors correction.  
21  
22  
23  
24

25 The prevalence of MetS and distribution of the study variables in subjects with  
26 and without MetS were determined.  
27  
28

29 For the bivariate analysis, Student's t-test was used for calculating means for  
30 variables normally distributed (using the Levene test for variance equality) and  
31 non-parametric tests such as the U Mann-Whitney test (independent samples) were  
32 used for variables showing non-normal distribution. For categorical variables, the  
33 Chi-squared test and Fisher's exact test were used whenever necessary for each  
34 contingency table. We also calculated correlation and regression measurements  
35 when necessary for the continuous variables. In addition, ANOVA tests were carried  
36 out with the post-hoc Bonferroni contrast method.  
37  
38  
39  
40  
41  
42  
43

44 Receiver Operator Characteristic (ROC) curves were performed and the Area  
45 Under the Curve (AUC) was calculated to find which explanatory variables best  
46 predict the onset of MetS. We obtained the cut-off value for each explanatory  
47 variable through the Youden index (JI) as  $JI = \text{Sensitivity} + \text{Specificity} - 1$ .  
48  
49  
50  
51

52 To measure the accuracy of the diagnostic test, sensitivity (S), specificity (SP),  
53 positive and negative predictive values (PPV and NPV), likelihood ratios (LH+ and  
54 LH-), validity index (VI) and JI were analysed.  
55  
56  
57  
58  
59  
60

1  
2  
3 The modification of NIM-MetS was obtained from a clinical decision tree  
4 (classification) using the CHAID (Chi-squared Automatic Interaction Detection)  
5 technique as a growth method. The statistical significance level for splitting nodes  
6 and merging categories was  $p < 0.05$ , and significance values were corrected by the  
7 Bonferroni method, with a maximum number of iterations of 2,000.  
8  
9

10  
11  
12 The following programs have been used for statistical and epidemiological data  
13 treatment: IBM SPSS Statistics 22.0 software (SPSS / IBM, Chicago, IL, USA) and  
14 Epidat version 4.2. (Department of Sanidade, Xunta de Galicia, Galicia, Spain). The  
15 level of statistical significance was fixed in all the contrasts for an alpha error below  
16 5%, and the confidence intervals were calculated with a 95% level of confidence.  
17  
18  
19  
20  
21  
22  
23  
24  
25  
26  
27  
28  
29  
30  
31  
32  
33  
34  
35  
36  
37  
38  
39  
40  
41  
42  
43  
44  
45  
46  
47  
48  
49  
50  
51  
52  
53  
54  
55  
56  
57  
58  
59  
60

## RESULTS

### *Characteristics of the study sample*

Of the 60,799 workers, 34,827 were male (57.3%). The overall mean age was 40 (39.9-40.1) (Table 1). Men had higher values than women for all the anthropometric and analytical indicators ( $p < 0.001$ ) except for %BF and HDL-Cholesterol. The prevalence of smokers was 34.8% (36.6% in men and 32.5% in women), and 17.6% of participants were obese (20% in men and 14.4% women). With regard to drug treatments, 6.6% were undergoing antihypertensive treatment, 3.2% lipid lowering treatments and 1.73% antidiabetic treatments. Finally, the overall prevalence of MetS was 9.0%, with 11.8% in men and 5.4% in women ( $p < 0.001$ ).

### *NIM-MetS validation*

Table 2 shows the results of diagnostic tests after applying the NIM-Mets method compared with NCEP-ATP III as a control test. Overall, the indicators of the NIM-MetS method validity were as follows: S = 54.7% (53.4-56), SP = 94.9% (94.7-95), and VI = 91.2% (91-91.5). The sensitivity was higher in men (59.4%) than in women (40.9%).

As regards the NIM-MetS safety indicators, results in the total sample were: PPV = 51.3% (50-52.6) and NPV = 95.5 (95.3-95.7). By gender, PPV was higher in men (51.4%) than in women (50.8%), while NPV was higher in women (96.7%) than in men (94.5%).

Finally, the overall JI was 0.5 (0.48 to 0.51), higher in men (0.52) than in women (0.39).

### *Comparison and behaviour of the cut-off value for WHtR ( $\geq 0.55$ ) according to gender and age*

A second question to be dealt with in this research was to compare the cut-off value for WHtR proposed by NIM-MetS with that obtained in the study sample, and

1  
2  
3 thus determine its variability according to the gender variable and in different age  
4 groups (Table 3). In the whole sample (n = 60,799), a cut-off value of 0.544 was  
5 obtained for WHtR. In the group of men (n = 34,827), the resulting threshold was  
6 0.558, while for women (n = 25,972) it was 0.525.  
7  
8  
9

10 It can be seen how the cut-off point increases with age. For men, it ranged  
11 from 0.553 (20-30 years old) to 0.563 ( $\geq 51$  years), whereas for women it was  
12 between 0.514 (20-30 years) and 0.55 ( $\geq 51$  years). The differences between the  
13 cut-off values for men and women become narrower as the age increased.  
14  
15  
16  
17  
18  
19

### 20 *Reproducibility of the NIM-MetS and the new method proposed*

21 The aim was to determine the degree of reproducibility of the NIM-MetS and to  
22 propose the required amendments and adjustments depending on the results. To  
23 do this, the original procedure for the construction of the NIM-MetS was followed:  
24 to select the anthropometric variables which best predict MetS and, working from  
25 these, to set up a clinical decision tree using the CHAID method.  
26  
27  
28  
29  
30

31 Figure 1 shows the results for the anthropometric variables' ROC curves. WHtR  
32 achieved the highest AUC 0.85 (0.84 to 0.86), with a cut-off value of 0.544,  
33 reaching top values of S = 68.5%, SP = 87% and JI = 0.56. The second variable  
34 with the highest AUC was WC, with 0.83 (0.82 to 0.84), a cut-off value of 89.1 cm  
35 and S = 72.5, SP = 77.6% and JI = 0.5. BMI with an AUC = 0.8 BMI and SBP with  
36 AUC = 0.79 also stood out.  
37  
38  
39  
40  
41  
42

43 After that, different clinical decision trees were made with a range of cut-off  
44 values for WHtR and BP (Table 4). Thus, the range of cut-offs for WHtR was defined  
45 by 8 thresholds between 0.535 and 0.57, and included, among others, the cut-off  
46 value proposed by NIM-MetS (WHtR $\geq 0.55$ ) and the cut-off value for the total  
47 sample (WHtR $\geq 0.544$ ). In addition, three models were established for BP:  
48 BP $\geq 128/80$  mmHg (cut-off values obtained for SBP and DBP as ROC curves, shown  
49 in Figure 2); BP $\geq 128/85$  mmHg (BP cut-off values proposed by NIM-MetS); and  
50 finally, only SBP $\geq 128$  mm Hg (second covariate with the highest adjusted OR in  
51  
52  
53  
54  
55  
56  
57  
58  
59  
60

1  
2  
3 the multiple logistic regression). In this way, 24 clinical decision trees were set up  
4 using CHAID methodology. Each tree comprised of a parent node (Node 0), two  
5 primary subsidiary nodes (Nodes 1 and 2) and four secondary subsidiary nodes  
6 (Nodes 3, 4, 5 and 6). Each of the last four nodes denoted the probability of having  
7 MetS. Thus, Node 3 corresponds to the probability that a worker has MetS when  
8 both anthropometric variables are negative (below cut-off values). Node 4 indicates  
9 the probability that a worker has MetS when BP is above the cut-off value and  
10 WHtR below. Node 5 represents the probability that a worker has MetS when BP is  
11 lower than the cut-off value and WHtR is above. Finally, Node 6 shows the  
12 probability that a worker suffers from MetS when both variables are positive (above  
13 the cut-off values). The model  $BP \geq 128/80$  mmHg was chosen because it had the  
14 highest Youden index value (greatest sensitivity and specificity combined) at each  
15 of the WHtR cut-off points (Table 4).

16  
17 The next step was to select the final cut-off value for WHtR. To do this, the  
18 method's probability of detection (Node 6 value) and the Youden index for the BP  
19 model chosen ( $BP \geq 128 / 80$  mmHg) were plotted for each WHtR cut-off value  
20 (Figure 2).

21  
22 It was noted that the probability of detection of MetS in each tree (Node 6  
23 value) and the WHtR threshold, as well as the Youden index and the WHtR  
24 threshold, follow linear functions, in which the equations of its lines are as follows:

- 25 • Probability MetS (Node 6) =  $5.534 * WHtR - 2.58$
- 26 • Youden index =  $-1.758 * WHtR + 1.486$

27  
28 Thus, the final threshold value for WHtR was determined by the cut-off point of  
29 both lines:  $WHtR = 0.558$  (Figure 2).

30  
31 The resulting new method for the early detection of MetS (new NIM-MetS)  
32 includes these conditions:  $WHtR \geq 0.558$  and  $BP \geq 128/80$  mmHg. Figure 3 shows the  
33 decision tree created from these variables and cut-off points. The sensitivity of the  
34 proposed method was 56.4%, specificity was 94.5%, validity index was 91.1% and  
35 the Youden index 0.51.

1  
2  
3 Finally, from the probabilities obtained in Nodes 3, 4, 5 and 6, a risk gradient  
4 for MetS was developed, according to the WHtR and BP covariates and the  
5 proposed cut-off values. Thus, those subjects with lower WHtR and BP values than  
6 the cut-off point have a very low probability of suffering from MetS (pMetS =  
7 0.4%). Low risk (pMetS=8.3%) would be found only in those individuals with BP  
8 values over 128/80 mmHg but low WHtR. A moderate level of risk (pMetS =  
9 16.3%) would include normotensive subjects who had a WHtR $\geq$ 0.558. Finally,  
10 subjects with WHtR $\geq$ 0.558 and BP $\geq$ 128/80 mmHg, would have a 50.5% risk of  
11 having MetS.  
12  
13  
14  
15  
16  
17  
18  
19  
20  
21  
22  
23  
24  
25  
26  
27  
28  
29  
30  
31  
32  
33  
34  
35  
36  
37  
38  
39  
40  
41  
42  
43  
44  
45  
46  
47  
48  
49  
50  
51  
52  
53  
54  
55  
56  
57  
58  
59  
60



## DISCUSSION

The validity and reproducibility of a non-invasive method for the early detection of MetS (NIM-MetS) has been determined. The validation was carried out from a study of diagnostic tests conducted in Spanish Caucasian adult workers and using, as a reference test, the NCEP-ATP III criteria for the diagnosis of MetS. The early detection of MetS is the key to improving the quality of life of our population, since it prevents the appearance of associated complications such as CVD, type 2 Diabetes Mellitus and, even, cancer [17-20].

NIM-MetS has shown a high validity index both in men (88.6%) and in women (94.7%). Overall, for every 100 workers, the method classified properly 91 cases. Similarly, NIM-MetS has proved to be highly specific, reaching an overall specificity of 94.9% (92.5% in men and 97.8% in women). Both VI and the SP recorded values above those achieved by this method in another Spanish population [15], where it obtained an IV = 89.5% and 91.5% Specificity. For sensitivity, the overall figure was 56.4% (59.4% for men and 40.9% for women), while in the original population, the overall sensitivity was 77.9%.

Although the indicators of validity and accuracy of a screening test (sensitivity and specificity) are intrinsic properties of the test itself and do not depend on the prevalence of the disease considered, this does not prevent these indicators from being affected by characteristics of the population they are applied to [21]. In fact, the most common observation is that a test for early detection or diagnosis alters its sensitivity and specificity depending on these characteristic features of the population. Therefore, the main differences between the two populations (the Balearic and the one considered in the previous study [15]) were analysed, highlighting those features of the Balearic population which contributed to a decreased sensitivity: a younger population (40 vs. 45.1 years), more females (42.7% vs. 32.1%), more smokers (34.8% vs. 28.6%) and lower values for WC (82.95 vs. 87.8 cm), WHtR (0.49 vs. 0.52) and BMI (26.1 vs. 26.5 kg/m<sup>2</sup>).

1  
2  
3 As regards the safety indicators of the test, the positive and negative predictive  
4 values, they are definitely affected by the prevalence of the population, lowering  
5 the PPV when the prevalence of MetS is lower. In this way, although we found a  
6 lower prevalence of MetS in the Balearic Islands than in Cordoba (9% vs. 13.9%),  
7 the NIM-Mets produced a lower PPV in the Balearic Islands (51.3% vs. 61.7%),  
8 while the negative predictive value remained very similar (95.5% vs. 95.9%).  
9

10  
11 Screening tests are often used in clinical practice. However, there are very few  
12 methods for the early detection of MetS other than the currently known diagnostic  
13 criteria, and there are even fewer non-invasive screening tests. A study in the  
14 Republic of Korea examined the validity of a test for the early detection of MetS  
15 based on the muscle-to-fat ratio [22]. The study was conducted on 6,256  
16 participants, with a sensitivity of 68.6% in men and 76% in women, and a  
17 specificity of 63.8% in men and 53.8% in women. Miller et al. [23] proposed a  
18 screening method for MetS in 745 young adults (18-29 years old) in the United  
19 States, based on making decision trees with the CHAID methodology and using all  
20 the criteria for MetS. The method had a validity rate of 89.4% and a sensitivity rate  
21 of 61.7%. Finally, De Kroon et al. [24] conducted a screening test for MetS in 642  
22 young people (aged 17-28) in the Netherlands using anthropometric variables (BMI,  
23 WC and BP). The sensitivity of the method was 68.75% and the validity index was  
24 95.6%.  
25  
26  
27  
28  
29  
30  
31  
32  
33  
34  
35  
36  
37  
38  
39  
40

41 Another hypothesis put forward in this research was to test whether the cut-off  
42 value proposed by NIM-MetS for WHtR ( $\geq 0.55$ ) would be reproduced in a large  
43 sample (60,799 workers from the Balearic Islands), and if it was also valid for both  
44 men and women and also for different age groups. WHtR had a cut-off value of  
45 0.544 for the total sample, with 0.558 men and 0.525 for women. As regards age  
46 groups, the WHtR threshold increased with age, with 0.553-0.563 for men and  
47 0.514-0.55 for women. These differences were reduced in the total sample (0.53-  
48 0.558).  
49  
50  
51  
52  
53  
54  
55  
56  
57  
58  
59  
60

1  
2  
3 It is noteworthy that several authors have proposed a universal 0.5 cut-off  
4 point for WHtR, both to detect MetS and to predict cardiometabolic risk and overall  
5 cardiovascular mortality [25-28]. However, in Spain, a cross-sectional study in the  
6 general population (n = 6,279, mean age = 43 years) showed that WHtR was the  
7 best anthropometric predictor of MetS (NCEP-ATP III), and the authors proposed a  
8 cut-off value of 0.55, with which they obtained a sensitivity of 91% and a specificity  
9 of 64% [28]. This cut-off value is very similar to the one proposed from the results  
10 obtained in the present study.  
11  
12  
13  
14  
15  
16  
17

18 In Chile, two important child population studies were conducted by Arnaiz et  
19 al., showing results which match the value of the cut-off point proposed in the  
20 present study. Thus, in the first study, conducted on 209 schoolchildren (mean age  
21 of 11.5), the authors obtained a cut-off value of 0.55 WHtR for MetS [29], while in  
22 the second study, performed in 2,980 children aged 6-14 (mean age of 9.9), the  
23 authors concluded that the WHtR did not change with age and gender and,  
24 therefore, a universal cut-off value could be agreed for both children and adults  
25 [30].  
26  
27  
28  
29  
30  
31  
32

33 The prospective study by Koch et al. [31] carried out in Chile on about 6,714  
34 men and 6,340 women, evaluating the relationship between various anthropometric  
35 indices of adiposity, cardiovascular risk factors and mortality for a cut-off value of  
36 0.55 obtained a sensitivity of 75.8 % and a specificity of 73.3% for men, and a  
37 sensitivity of 77.6% and specificity of 56.3% for women.  
38  
39  
40  
41  
42

43 In addition, several investigations conducted in non-European and non-Hispanic  
44 populations also concur on this threshold of WHtR for MetS. Thus, Obeidat et al.  
45 [32] in a study on a Jordanian population (n = 630, aged 20-70 years) reported a  
46 cut-off value of 0.56 in men and 0.52 in women; in India, Rajput et al. [33],  
47 achieved a threshold of 0.52 for men and women (n = 3,042) in all locations (rural  
48 or urban areas); and in China, He et al. [34], in a descriptive study of 1,068 adult  
49 subjects, reported a cut-off value for WHtR of 0.5 for men and women alike.  
50  
51  
52  
53  
54  
55  
56  
57  
58  
59  
60

1  
2  
3 As for the reproducibility of the NIM-MetS method in this new, larger sample of  
4 60,799 workers from the Balearic Islands, the method has produced again the  
5 same variables obtained in Cordoba. In the multiple logistic regression, WHtR and  
6 BP achieved the highest adjusted OR values. Thus, WHtR was the anthropometric  
7 index that best discriminated MetS presence, with an adjusted OR value of 4.4  
8 (3.9-4.9), while SBP obtained an adjusted OR value of 3.8 (3.5-4.1).  
9

10  
11  
12  
13  
14 Several investigations have confirmed the high predictive ability of WHtR for  
15 MetS and CVD. In the systematic review conducted by Ashwell et al. [35], in which  
16 10 out of the 31 studies analysed the association between anthropometric  
17 measurements of central obesity and MetS, WHtR had the highest AUC value 0.76  
18 (men) and 0.75 (women). This contrasted with WC, which obtained an AUC value of  
19 0.75 (equal for men and women) and BMI, with an AUC value of 0.72 (men and  
20 women). Similarly, a meta-analysis conducted by Savva et al. [36], in which 8 out  
21 of the 24 studies included compared WHtR (cut-off point 0.5) with BMI (cut-off  
22 point of 23 for the Asian population and 25 for the rest) for cardiometabolic risk in  
23 an Asian and non-Asian population, and concluded that WHtR showed a stronger  
24 association with MetS than with BMI.  
25  
26  
27  
28  
29  
30  
31  
32  
33  
34

35 Through the present study, the NIM-MetS method has been corrected, and  
36 definitive cut-off values have been proposed for WHtR (0.558) and BP (128-80  
37 mmHg), from which a sensitivity rate of 56.4%, a specificity rate of 94.5%, a  
38 validity index of 91.1% and a Youden index of 0.51 are obtained. On the other  
39 hand, finally, the long-term ability of MetS to predict CVD has shown to be limited  
40 by the dichotomous (binary) and qualitative nature of the classic diagnostic criteria  
41 for MetS. An innovative aspect that NIM-MetS brings is to provide a gradient or  
42 scale of risk of developing MetS which is divided into four risk levels: Very low risk  
43 (probability = 0.4%), low risk (probability = 8.3%), moderate risk (probability =  
44 16.4%) and high risk (probability = 50.5%). In this way, health professionals can  
45 take certain steps depending on the level of risk of MetS and promote a more  
46 accurate and early detection of the possible complications associated with CVD and  
47  
48  
49  
50  
51  
52  
53  
54  
55  
56  
57  
58  
59  
60

1  
2  
3 MetS. Along the same lines, there have been several studies using methods based  
4 on scores to quantify the amount of risk accumulated by the presence of the  
5 components that define the metabolic syndrome (Metabolic Syndrome Severity  
6 Score) [37, 38].  
7  
8  
9

## 10 11 12 **Conclusions**

13  
14  
15 The NIN-MetS has proved to be a valid method for the early detection of MetS  
16 in a healthy worker population. It is a simple, economical and quick non-invasive  
17 test which is easy to apply and interpret in any health care setting (primary health  
18 care, hospitals, occupational health) as well as in other settings (education, sport,  
19 etc.). WHtR is the best predictor of MetS and its cut-off point can be used for both  
20 genders and for different age groups. The clinical decision tree that produces the  
21 NIM-MetS uses WHtR (0.558) and BP (128/80 mm Hg), and obtains high specificity  
22 and diagnostic validity. The NIM-MetS provides a gradient or risk scale which allows  
23 a more accurate and earlier detection of CVD in subjects with risk of MetS.  
24  
25  
26  
27  
28  
29  
30  
31  
32  
33  
34  
35

## 36 **Contributor ship statement.**

37  
38 Manuel Romero-Saldana contributed to the conception, design, acquisition and  
39 analysis/interpretation of data, drafted the manuscript, critically revised the  
40 manuscript and gave his final approval to the text, while also agreeing to be  
41 accountable for the integrity and accuracy of all aspects of the work.  
42  
43  
44

45 Pedro Tauler contributed to the data collection, analysis, critically revised the  
46 manuscript, gave his final approval, and agrees to be accountable for the integrity  
47 and accuracy of all aspects of the work.  
48  
49  
50

51 Manuel Vaquero-Abellán contributed to the analysis and interpretation, critically  
52 revised the manuscript, gave his final approval, and agrees to be accountable for  
53 the integrity and accuracy of all aspects of the work.  
54  
55  
56  
57  
58  
59  
60

1  
2  
3 Angel A. Lopez-Gonzalez contributed to the data collection, analysis, critically  
4 revised the manuscript, gave his final approval, and agrees to be accountable for  
5 the integrity and accuracy of all aspects of the work.  
6  
7

8  
9  
10 Francisco J. Fuentes-Jimenez contributed to the analysis, critically revised the  
11 manuscript, gave his final approval, and agrees to be accountable for the integrity  
12 and accuracy of all aspects of the work.  
13  
14

15  
16 Antoni Aguilo contributed to the conception, critically revised the manuscript, gave  
17 his final approval, and agrees to be accountable for the integrity and accuracy of all  
18 aspects of the work.  
19  
20

21  
22 Carlos Alvarez-Fernandez contributed to the conception, critically revised the  
23 manuscript, gave his final approval, and agrees to be accountable for the integrity  
24 and accuracy of all aspects of the work.  
25  
26

27  
28 Guillermo Molina-Recio contributed to the analysis and interpretation, critically  
29 revised the manuscript, gave her final approval and agrees to be accountable for  
30 the integrity and accuracy of all aspects of the work.  
31  
32

33  
34 Miquel Bannasar-Veny contributed to the design and the acquisition of data,  
35 critically revised the manuscript, gave his final approval, and agrees to be  
36 accountable for the integrity and accuracy of all aspects of the work.  
37  
38

#### 39 40 41 **Competing interests.**

42 None declared.  
43

#### 44 **Funding**

45  
46 This research received no specific grant from any funding agency in the public,  
47 commercial, or not-for-profit sectors.  
48  
49

#### 50 **Data sharing statement**

51 We are willing to share the study data with other research groups  
52  
53  
54  
55  
56  
57  
58  
59  
60

**REFERENCES**

1. Swinburn BA, Sacks G, Hall KD, McPherson K, Finegood DT, Moodie ML, et al. The global obesity pandemic: shaped by global drivers and local environments. *Lancet*. 2011;378(9793):804-14. doi: 10.1016/S0140-6736(11)60813-1. PubMed PMID: 21872749.
2. Tauler P, Bennasar-Veny M, Morales-Asencio JM, Lopez-Gonzalez AA, Vicente-Herrero T, De Pedro-Gomez J, et al. Prevalence of premorbid metabolic syndrome in Spanish adult workers using IDF and ATPIII diagnostic criteria: relationship with cardiovascular risk factors. *PLoS One*. 2014;9(2):e89281. doi: 10.1371/journal.pone.0089281. PubMed PMID: 24586656; PubMed Central PMCID: PMC3930690.
3. Yamaoka K, Tango T. Effects of lifestyle modification on metabolic syndrome: a systematic review and meta-analysis. *BMC Med*. 2012;10:138. doi: 10.1186/1741-7015-10-138. PubMed PMID: 23151238; PubMed Central PMCID: PMC3523078.
4. Guh DP, Zhang W, Bansback N, Amarsi Z, Birmingham CL, Anis AH. The incidence of co-morbidities related to obesity and overweight: a systematic review and meta-analysis. *BMC Public Health*. 2009;9:88. doi: 10.1186/1471-2458-9-88. PubMed PMID: 19320986; PubMed Central PMCID: PMC2667420.
5. Schneider HJ, Klotsche J, Silber S, Stalla GK, Wittchen HU. Measuring abdominal obesity: effects of height on distribution of cardiometabolic risk factors risk using waist circumference and waist-to-height ratio. *Diabetes Care*. 2011;34(1):e7. doi: 10.2337/dc10-1794. PubMed PMID: 21193616.
6. Zimmet PZ, Alberti KG, Shaw JE. Mainstreaming the metabolic syndrome: a definitive definition. *Med J Aust*. 2005;183(4):175-6. PubMed PMID: 16097912.

- 1  
2  
3 7. Bennasar-Veny M, Lopez-Gonzalez AA, Tauler P, Cespedes ML, Vicente-  
4 Herrero T, Yanez A, et al. Body adiposity index and cardiovascular health risk  
5 factors in Caucasians: a comparison with the body mass index and others. PLoS  
6 One. 2013;8(5):e63999. doi: 10.1371/journal.pone.0063999. PubMed PMID:  
7 23734182; PubMed Central PMCID: PMC3667028.
- 8  
9 8. Rosales M. Antropometría en el diagnóstico de pacientes obesos: una  
10 revisión. Nutr Hosp 2012;27(6):1803-9.
- 11  
12 9. Despres JP, Prud'homme D, Pouliot MC, Tremblay A, Bouchard C. Estimation  
13 of deep abdominal adipose-tissue accumulation from simple anthropometric  
14 measurements in men. Am J Clin Nutr. 1991;54(3):471-7. PubMed PMID: 1877502.
- 15  
16 10. Kodama S, Horikawa C, Fujihara K, Heianza Y, Hirasawa R, Yachi Y, et al.  
17 Comparisons of the strength of associations with future type 2 diabetes risk among  
18 anthropometric obesity indicators, including waist-to-height ratio: a meta-analysis.  
19 Am J Epidemiol. 2012;176(11):959-69. doi: 10.1093/aje/kws172. PubMed PMID:  
20 23144362.
- 21  
22 11. Petursson H, Sigurdsson JA, Bengtsson C, Nilsen TI, Getz L. Body  
23 configuration as a predictor of mortality: comparison of five anthropometric  
24 measures in a 12 year follow-up of the Norwegian HUNT 2 study. PLoS One.  
25 2011;6(10):e26621. doi: 10.1371/journal.pone.0026621. PubMed PMID:  
26 22028926; PubMed Central PMCID: PMC3197688.
- 27  
28 12. Taylor AE, Ebrahim S, Ben-Shlomo Y, Martin RM, Whincup PH, Yarnell JW, et  
29 al. Comparison of the associations of body mass index and measures of central  
30 adiposity and fat mass with coronary heart disease, diabetes, and all-cause  
31 mortality: a study using data from 4 UK cohorts. Am J Clin Nutr. 2010;91(3):547-  
32 56. doi: 10.3945/ajcn.2009.28757. PubMed PMID: 20089729.
- 33  
34 13. Lam BC, Koh GC, Chen C, Wong MT, Fallows SJ. Comparison of Body Mass  
35 Index (BMI), Body Adiposity Index (BAI), Waist Circumference (WC), Waist-To-Hip  
36 Ratio (WHR) and Waist-To-Height Ratio (WHtR) as predictors of cardiovascular  
37 disease risk factors in an adult population in Singapore. PLoS One.  
38  
39  
40  
41  
42  
43  
44  
45  
46  
47  
48  
49  
50  
51  
52  
53  
54  
55  
56  
57  
58  
59  
60



1  
2  
3 2015;10(4):e0122985. doi: 10.1371/journal.pone.0122985. PubMed PMID:  
4 25880905; PubMed Central PMCID: PMC4400161.

5  
6 14. Hsieh SD, Yoshinaga H. Waist/height ratio as a simple and useful predictor  
7 of coronary heart disease risk factors in women. *Intern Med.* 1995;34(12):1147-52.  
8 PubMed PMID: 8929639.

9  
10 15. Romero-Saldana M, Fuentes-Jimenez FJ, Vaquero-Abellan M, Alvarez-  
11 Fernandez C, Molina-Recio G, Lopez-Miranda J. New non-invasive method for early  
12 detection of metabolic syndrome in the working population. *Eur J Cardiovasc Nurs.*  
13 2016. Vol. 15 (7): 549-558. Doi: 10.1177/1474515115626622.

14  
15 16. Stewart A, Marfell-Jones M, Olds T, de Ridder H. International standards for  
16 anthropometric assessment. Lower Hutt, New Zealand: ISAK; 2011.

17  
18 17. Braun S, Bitton-Worms K, LeRoith D. The link between the metabolic  
19 syndrome and cancer. *Int J Biol Sci.* 2011;7(7):1003-15. PubMed PMID: 21912508;  
20 PubMed Central PMCID: PMC3164150.

21  
22 18. Devers MC, Campbell S, Simmons D. Influence of age on the prevalence and  
23 components of the metabolic syndrome and the association with cardiovascular  
24 disease. *BMJ Open Diabetes Res Care.* 2016;4(1):e000195. doi: 10.1136/bmjdr-  
25 2016-000195. PubMed PMID: 27158519; PubMed Central PMCID:  
26 PMC4853802.

27  
28 19. Ford ES, Li C, Sattar N. Metabolic syndrome and incident diabetes: current  
29 state of the evidence. *Diabetes Care.* 2008;31(9):1898-904. doi: 10.2337/dc08-  
30 0423. PubMed PMID: 18591398; PubMed Central PMCID: PMC2518368.

31  
32 20. Gami AS, Witt BJ, Howard DE, Erwin PJ, Gami LA, Somers VK, et al.  
33 Metabolic syndrome and risk of incident cardiovascular events and death: a  
34 systematic review and meta-analysis of longitudinal studies. *J Am Coll Cardiol.*  
35 2007;49(4):403-14. doi: 10.1016/j.jacc.2006.09.032. PubMed PMID: 17258085.

36  
37 21. Diamond GA. Clinical epistemology of sensitivity and specificity. *J Clin*  
38 *Epidemiol.* 1992;45(1):9-13; discussion 5-6. PubMed PMID: 1738017.

- 1  
2  
3 22. Park J, Kim S. Validity of muscle-to-fat ratio as a predictor of adult metabolic  
4 syndrome. *J Phys Ther Sci.* 2016;28(3):1036-45. doi: 10.1589/jpts.28.1036.  
5 PubMed PMID: 27134408; PubMed Central PMCID: PMC4842420.  
6  
7  
8 23. Miller B, Fridline M, Liu PY, Marino D. Use of CHAID decision trees to  
9 formulate pathways for the early detection of metabolic syndrome in young adults.  
10 *Comput Math Methods Med.* 2014;2014:242717. doi: 10.1155/2014/242717.  
11 PubMed PMID: 24817904; PubMed Central PMCID: PMC4003739.  
12  
13  
14 24. de Kroon ML, Renders CM, Kuipers EC, van Wouwe JP, van Buuren S, de  
15 Jonge GA, et al. Identifying metabolic syndrome without blood tests in young  
16 adults--the Terneuzen Birth Cohort. *Eur J Public Health.* 2008;18(6):656-60. doi:  
17 10.1093/eurpub/ckn056. PubMed PMID: 18603599.  
18  
19  
20 25. Ashwell M, Hsieh SD. Six reasons why the waist-to-height ratio is a rapid  
21 and effective global indicator for health risks of obesity and how its use could  
22 simplify the international public health message on obesity. *Int J Food Sci Nutr.*  
23 2005;56(5):303-7. doi: 10.1080/09637480500195066. PubMed PMID: 16236591.  
24  
25  
26 26. Bellido D, Lopez de la Torre M, Carreira J, de Luis D, Bellido V, Soto A, et al.  
27 [Anthropometric measures of central abdominal fat and discriminant capacity for  
28 metabolic syndrome in a Spanish population]. *Clin Investig Arterioscler.*  
29 2013;25(3):105-9. doi: 10.1016/j.arteri.2013.05.007. PubMed PMID: 23916262.  
30  
31  
32 27. Browning LM, Hsieh SD, Ashwell M. A systematic review of waist-to-height  
33 ratio as a screening tool for the prediction of cardiovascular disease and diabetes:  
34 0.5 could be a suitable global boundary value. *Nutr Res Rev.* 2010;23(2):247-69.  
35 doi: 10.1017/S0954422410000144. PubMed PMID: 20819243.  
36  
37  
38 28. Cristo Rodriguez Perez MD, Cabrera De Leon A, Aguirre-Jaime A, Dominguez  
39 Coello S, Brito Diaz B, Almeida Gonzalez D, et al. [The waist to height ratio as an  
40 index of cardiovascular risk and diabetes]. *Med Clin (Barc).* 2010;134(9):386-91.  
41 doi: 10.1016/j.medcli.2009.09.047. PubMed PMID: 20138315.  
42  
43  
44 29. Arnaiz P, Marin A, Pino F, Barja S, Aglony M, Navarrete C, et al. [Waist  
45 height ratio, ultrasensitive c reactive protein and metabolic syndrome in children].  
46  
47  
48  
49  
50  
51  
52  
53  
54  
55  
56  
57  
58  
59  
60

1  
2  
3 Rev Med Chil. 2010;138(11):1378-85. doi: /S0034-98872010001200006. PubMed  
4 PMID: 21279250.

5  
6 30. Arnaiz P, Grob F, Cavada G, Dominguez A, Bancalari R, Cerda V, et al.  
7 [Waist-to-height ratio does not change with gender, age and pubertal stage in  
8 elementary school children]. Rev Med Chil. 2014;142(5):574-8. doi:  
9 10.4067/S0034-98872014000500004. PubMed PMID: 25427013.

10  
11 31. Koch E, Romero T, Manríquez L, Taylor A, Román C, Paredes M. Razón  
12 cintura-estatura: Un mejor predictor antropométrico de riesgo cardiovascular y  
13 mortalidad en adultos chilenos. Nomograma diagnóstico utilizado en el Proyecto  
14 San Francisco. Revista Chilena de Cardiología. 2008;27(1):23-35.

15  
16 32. Obeidat AA, Ahmad MN, Haddad FH, Azzeh FS. Evaluation of Several  
17 Anthropometric Indices of Obesity as Predictors of Metabolic Syndrome in Jordanian  
18 Adults. Nutr Hosp. 2015;32(2):667-77. doi: 10.3305/nh.2015.32.2.9063. PubMed  
19 PMID: 26268097.

20  
21 33. Rajput R, Rajput M, Bairwa M, Singh J, Saini O, Shankar V. Waist height  
22 ratio: A universal screening tool for prediction of metabolic syndrome in urban and  
23 rural population of Haryana. Indian J Endocrinol Metab. 2014;18(3):394-9. doi:  
24 10.4103/2230-8210.131201. PubMed PMID: 24944937; PubMed Central PMCID:  
25 PMC4056141.

26  
27 34. He YH, Chen YC, Jiang GX, Huang HE, Li R, Li XY, et al. Evaluation of  
28 anthropometric indices for metabolic syndrome in Chinese adults aged 40 years and  
29 over. Eur J Nutr. 2012;51(1):81-7. doi: 10.1007/s00394-011-0195-2. PubMed  
30 PMID: 21479941.

31  
32 35. Ashwell M, Gunn P, Gibson S. Waist-to-height ratio is a better screening tool  
33 than waist circumference and BMI for adult cardiometabolic risk factors: systematic  
34 review and meta-analysis. Obes Rev. 2012;13(3):275-86. doi: 10.1111/j.1467-  
35 789X.2011.00952.x. PubMed PMID: 22106927.

36  
37 36. Savva SC, Lamnisis D, Kafatos AG. Predicting cardiometabolic risk: waist-  
38 to-height ratio or BMI. A meta-analysis. Diabetes Metab Syndr Obes. 2013;6:403-  
39

1  
2  
3 19. doi: 10.2147/DMSO.S34220. PubMed PMID: 24179379; PubMed Central  
4  
5 PMCID: PMCPMC3810792.

6  
7 37. Mark D, De Boer MD, Gurka MJ, Woo JG, Morrison JA. Severity of the  
8  
9 metabolic syndrome as a predictor of type 2 diabetes between childhood and  
10  
11 adulthood: the Princeton Lipid Research Cohort Study. *Diabetologia*.  
12  
13 2015;58(12):2745-52.

14  
15 38. Wiley JF, Carrington MJ. A metabolic syndrome severity score: A tool to  
16  
17 quantify cardio-metabolic risk factors. *Prev Med*. 2016;88:189-95. doi:  
18  
19 10.1016/j.ypmed.2016.04.006. PubMed PMID: 27095322.  
20  
21  
22  
23  
24  
25  
26  
27  
28  
29  
30  
31  
32  
33  
34  
35  
36  
37  
38  
39  
40  
41  
42  
43  
44  
45  
46  
47  
48  
49  
50  
51  
52  
53  
54  
55  
56  
57  
58  
59  
60

**Table 1. Characteristics of the sample according to gender.**

| Variable                 | Total<br>n=60,799       | Men<br>n= 34,827         | Women<br>n= 25,972    | p      |
|--------------------------|-------------------------|--------------------------|-----------------------|--------|
| Age                      | 40 (39.9 – 40.1)        | 40.4 (40.3 – 40.5)       | 39.5 (39.3 – 39.6)    | <0.001 |
| Smoke (yes) n (%)        | 21,177 (34.8%)          | 12,746 (36.6%)           | 8,431 (32.5%)         | <0.001 |
| BMI (Kg/m <sup>2</sup> ) | 26.1 (26 – 26.1)        | 26.9 (26.8 – 26.9)       | 25 (25 – 25.1)        | <0.001 |
| WC (cm)                  | 82.95 (82.9 – 83)       | 88.6 (88.5 – 88.7)       | 75.4 (75.3 – 75.5)    | <0.001 |
| WHtR                     | 0.49 (0.49 – 0.49)      | 0.51 (0.50 – 0.51)       | 0.47 (0.46 – 0.47)    | <0.001 |
| ABSI                     | 0.0735 (0.073 – 0.0735) | 0.0735 (0.0735 – 0.0735) | 0.07 (0.07 – 0.07)    | <0.001 |
| BF (%)                   | 28.9 (28.9 – 29)        | 25.3 (25.3 – 25.4)       | 33.7 (33.6 – 37.8)    | <0.001 |
| SBP (mm Hg)              | 120.8 (120.6 – 120.9)   | 125.4 (125.2 – 125.6)    | 114.6 (114.4 – 114.8) | <0.001 |
| DBP (mm Hg)              | 73.6 (73.5 – 73.7)      | 76 (75.9 – 76.1)         | 70.4 (70.3 – 70.5)    | <0.001 |
| Glucose (mg/dL)          | 88.3 (88.1 – 88.5)      | 90.6 (90.4 – 90.8)       | 85.2 (85 – 85.4)      | <0.001 |
| Cholesterol (mg/dl)      | 195.2 (194.9 – 195.5)   | 196.9 (196.5 – 197.3)    | 193 (192.6 – 193.4)   | <0.001 |
| HDL-Cholesterol (mg/dL)  | 52.4 (52.3 – 52.5)      | 50.5 (50.4 – 50.6)       | 55 (54.9 – 55.1)      | <0.001 |
| LDL-Cholesterol (mg/dL)  | 121.2 (120.9 – 121.5)   | 121.8 (121.4 – 126.2)    | 120.5 (120 – 120.9)   | <0.001 |
| Triglycerides (mg/dL)    | 109.3 (108.7 – 109.9)   | 125.3 (124.4 – 126.2)    | 88.8 (88.2 – 89.4)    | <0.001 |
| MetS (yes) n (%)         | 5,487 (9.0%)            | 4,097 (11.8%)            | 1,390 (5.4%)          | <0.001 |

BMI: Body Mass Index; WC: Waist circumference; WHtR: Waist to Height Ratio; ABSI: A body Shape Index; BF (%): Body Fat percentage calculated according to the Deurenberg equation; SBP: Systolic Blood Pressure; DBP: Diastolic Blood Pressure; MetS: Metabolic syndrome. P<0.05 indicates significant differences between genders

**Table 2. Diagnostic test accuracy of NIM-MetS against NCEP-ATPIII  
STANDARD REFERENCE NCEP APTIII**

|                                    |              | TOTAL              |        |        | MEN                |        |        | WOMEN              |        |        |
|------------------------------------|--------------|--------------------|--------|--------|--------------------|--------|--------|--------------------|--------|--------|
|                                    |              | Yes                | No     | Total  | Yes                | No     | Total  | Yes                | No     | Total  |
| <b>NIM – MetS<br/>(n)</b>          | <b>Yes</b>   | 3,001              | 2,850  | 5,851  | 2,433              | 2,300  | 4,733  | 568                | 550    | 1,118  |
|                                    | <b>No</b>    | 2,486              | 52,462 | 54,948 | 1,664              | 28,430 | 30,094 | 822                | 24,032 | 24,854 |
|                                    | <b>Total</b> | 5,487              | 55,312 | 60,799 | 4,097              | 30,730 | 34,827 | 1,390              | 24,582 | 25,972 |
| <b>Efficacy indicators, CI 95%</b> |              |                    |        |        |                    |        |        |                    |        |        |
| <b>Sensitivity</b>                 |              | 54.7 (53.4 – 56)   |        |        | 59.4 (57.9 – 60.9) |        |        | 40.9 (38.2 – 43.5) |        |        |
| <b>Specificity</b>                 |              | 94.9 (94.7 – 95)   |        |        | 92.5 (92.2 – 92.8) |        |        | 97.8 (97.6 – 98)   |        |        |
| <b>PPV</b>                         |              | 51.3 (50 – 52.6)   |        |        | 51.4 (50 – 52.8)   |        |        | 50.8 (47.8 – 53.8) |        |        |
| <b>NPV</b>                         |              | 95.5 (95 – 95.7)   |        |        | 94.5 (94.2 – 94.7) |        |        | 96.7 (96.5 – 96.9) |        |        |
| <b>VI</b>                          |              | 91.2 (91 – 91.5)   |        |        | 88.6 (88.3 – 89)   |        |        | 94.7 (94.4 – 95)   |        |        |
| <b>LH +</b>                        |              | 10.6 (10.2 – 11.1) |        |        | 7.9 (7.6 – 8.3)    |        |        | 18.3 (16.5 – 20.3) |        |        |
| <b>LH -</b>                        |              | 0.48 (0.46 – 0.49) |        |        | 0.44 (0.42 – 0.46) |        |        | 0.6 (0.58 – 0.63)  |        |        |
| <b>JI</b>                          |              | 0.50 (0.48 – 0.51) |        |        | 0.52 (0.5 – 0.53)  |        |        | 0.39 (0.36 – 0.41) |        |        |

PPV: Positive Predictive Value; NPV: Negative Predictive Value; VI: Validity Index; LH +: Likelihood ratio positive; LH -: Likelihood ratio negative; JI: Youden Index.

**Table 3. Area under the curve (AUC) and cut-off values for WHtR according to gender and age groups**

| Age group (years) | n      | Prevalence of MetS (%) <sup>a</sup> | AUC CI 95%         | Cut-off value | Sensitivity (%) | Specificity (%) | JI    |
|-------------------|--------|-------------------------------------|--------------------|---------------|-----------------|-----------------|-------|
| <b>MEN</b>        |        |                                     |                    |               |                 |                 |       |
| <b>20-30</b>      | 6,825  | 3.05                                | 0.92 (0.9 – 0.95)  | 0.553         | 80.3            | 93.4            | 0.74  |
| <b>31-40</b>      | 11,623 | 7.5                                 | 0.88 (0.86 – 0.89) | 0.55          | 77.4            | 88.1            | 0.65  |
| <b>41-50</b>      | 10,080 | 14.9                                | 0.82 (0.81 – 0.83) | 0.561         | 66.4            | 87.7            | 0.541 |
| <b>≥51</b>        | 6,659  | 23.1                                | 0.75 (0.74 – 0.77) | 0.563         | 58.9            | 83.01           | 0.42  |
| <b>Total</b>      | 34,827 | 11.8                                | 0.84 (0.83 – 0.85) | 0.558         | 66.7            | 88.8            | 0.555 |
| <b>WOMEN</b>      |        |                                     |                    |               |                 |                 |       |
| <b>20-30</b>      | 5,715  | 1.1                                 | 0.90 (0.85 – 0.95) | 0.514         | 82              | 84              | 0.736 |
| <b>31-40</b>      | 8,529  | 2.7                                 | 0.91 (0.89 – 0.93) | 0.525         | 80.3            | 90.8            | 0.71  |
| <b>41-50</b>      | 7,641  | 6.6                                 | 0.91 (0.89 – 0.93) | 0.525         | 80.3            | 90.8            | 0.71  |
| <b>≥51</b>        | 4,087  | 14.4                                | 0.75 (0.73 – 0.77) | 0.55          | 48.4            | 90.5            | 0.39  |
| <b>Total</b>      | 25,972 | 5.4                                 | 0.85 (0.84 – 0.86) | 0.525         | 65.1            | 88.7            | 0.54  |
| <b>TOTAL</b>      |        |                                     |                    |               |                 |                 |       |
| <b>20-30</b>      | 12,540 | 2.1                                 | 0.92 (0.9 – 0.94)  | 0.531         | 84.4            | 90.1            | 0.745 |
| <b>31-40</b>      | 19,792 | 5.5                                 | 0.9 (0.89 – 0.91)  | 0.541         | 78.2            | 88.5            | 0.67  |
| <b>41-50</b>      | 17,721 | 11.3                                | 0.83 (0.82 – 0.84) | 0.544         | 69.6            | 84.3            | 0.539 |
| <b>≥51</b>        | 10,746 | 19.8                                | 0.76 (0.75 – 0.77) | 0.558         | 57              | 85.3            | 0.423 |
| <b>Total</b>      | 60,799 | 9                                   | 0.85 (0.84 – 0.86) | 0.544         | 68.5            | 87              | 0.556 |

a: MetS according to NCEP ATPIII criterion; AUC: area under the curve; JI: Youden Index

**Table 4. Probabilities of MetS (%) for nodes 3, 4, 5 and 6 in decision trees according to cut-off values of WtHR**

| WtHR range               | BP model        | Probabilities of MetS for nodes in the decision tree |        |        |        | Efficacy indicators for diagnostic test accuracy |                 |        |       |
|--------------------------|-----------------|------------------------------------------------------|--------|--------|--------|--------------------------------------------------|-----------------|--------|-------|
|                          |                 | Node 3                                               | Node 4 | Node 5 | Node 6 | Sensitivity (%)                                  | Specificity (%) | VI (%) | JI    |
| <b>0.535</b>             | BP <sup>1</sup> | 0.3                                                  | 7.4    | 10.3   | 38.4   | 63.9                                             | 89.7            | 87.5   | 0.536 |
|                          | BP <sup>2</sup> | 0.5                                                  | 10.4   | 12.2   | 43.3   | 59.3                                             | 92.3            | 89.3   | 0.516 |
|                          | SBP             | 0.6                                                  | 10.5   | 13.7   | 43.3   | 57                                               | 92.6            | 89.4   | 0.496 |
| <b>0.54</b>              | BP <sup>1</sup> | 0.3                                                  | 7.6    | 11.5   | 40.7   | 62.7                                             | 90.9            | 88.4   | 0.536 |
|                          | BP <sup>2</sup> | 0.5                                                  | 10.5   | 13.5   | 45.7   | 57.8                                             | 93.2            | 90     | 0.51  |
|                          | SBP             | 0.6                                                  | 10.7   | 15.2   | 45.7   | 55.6                                             | 93.5            | 90     | 0.491 |
| <b>0.544<sup>a</sup></b> | BP <sup>1</sup> | 0.4                                                  | 7.7    | 12.5   | 42.8   | 61.6                                             | 91.8            | 89.1   | 0.534 |
|                          | BP <sup>2</sup> | 0.5                                                  | 10.9   | 14.6   | 48     | 56.7                                             | 93.9            | 90.5   | 0.506 |
|                          | SBP             | 0.6                                                  | 10.8   | 16.4   | 48     | 54.5                                             | 94.1            | 90.6   | 0.486 |
| <b>0.550<sup>b</sup></b> | BP <sup>1</sup> | 0.4                                                  | 7.9    | 14.2   | 46.1   | 59.6                                             | 93.1            | 90.1   | 0.527 |
|                          | BP <sup>2</sup> | 0.5                                                  | 10.9   | 16.6   | 51.3   | 54.7                                             | 94.8            | 91.2   | 0.461 |
|                          | SBP             | 0.7                                                  | 11     | 18.5   | 51.4   | 52.6                                             | 95.1            | 91.2   | 0.477 |
| <b>0.555</b>             | BP <sup>1</sup> | 0.4                                                  | 8.2    | 15.7   | 49.1   | 57.8                                             | 94.1            | 90.8   | 0.519 |
|                          | BP <sup>2</sup> | 0.6                                                  | 11.1   | 18.3   | 54.4   | 53                                               | 95.6            | 91.7   | 0.486 |
|                          | SBP             | 0.7                                                  | 11.3   | 20.3   | 54.5   | 51                                               | 95.8            | 91.7   | 0.468 |
| <b>0.560</b>             | BP <sup>1</sup> | 0.5                                                  | 8.5    | 17     | 51.8   | 55.7                                             | 94.9            | 91.3   | 0.506 |
|                          | BP <sup>2</sup> | 0.6                                                  | 11.5   | 19.9   | 57.1   | 51                                               | 96.2            | 92.1   | 0.472 |
|                          | SBP             | 0.8                                                  | 11.6   | 21.9   | 57.2   | 49.1                                             | 96.4            | 92.1   | 0.455 |
| <b>0.565</b>             | BP <sup>1</sup> | 0.5                                                  | 8.8    | 18.6   | 54.9   | 53.4                                             | 95.6            | 91.8   | 0.49  |
|                          | BP <sup>2</sup> | 0.6                                                  | 11.9   | 21.8   | 60.3   | 48.8                                             | 96.8            | 92.5   | 0.456 |
|                          | SBP             | 0.8                                                  | 12     | 23.9   | 60.4   | 47                                               | 96.9            | 92.4   | 0.439 |
| <b>0.570</b>             | BP <sup>1</sup> | 0.5                                                  | 9.1    | 19.9   | 57.4   | 51.4                                             | 96.2            | 92.2   | 0.476 |
|                          | BP <sup>2</sup> | 0.7                                                  | 12.3   | 23.3   | 62.8   | 46.9                                             | 97.2            | 92.7   | 0.441 |
|                          | SBP             | 0.9                                                  | 12.4   | 25.5   | 63     | 45.2                                             | 97.4            | 92.7   | 0.426 |

BP: Blood Pressure; BP<sup>1</sup>: Blood pressure  $\geq 128/80$  mmHg; BP<sup>2</sup>: Blood pressure  $\geq 128/85$  mmHg; SBP: Systolic blood pressure  $\geq 128$  mmHg; VI: Validity index; JI: Youden Index; a: Cut-off point for WtHR obtained in the total sample (n=60,799); b: Cut-off point proposed by NIM-MetS



**Figure 1. Anthropometric variables. ROC curves, area under the curve, cut-off points and efficacy indicators**

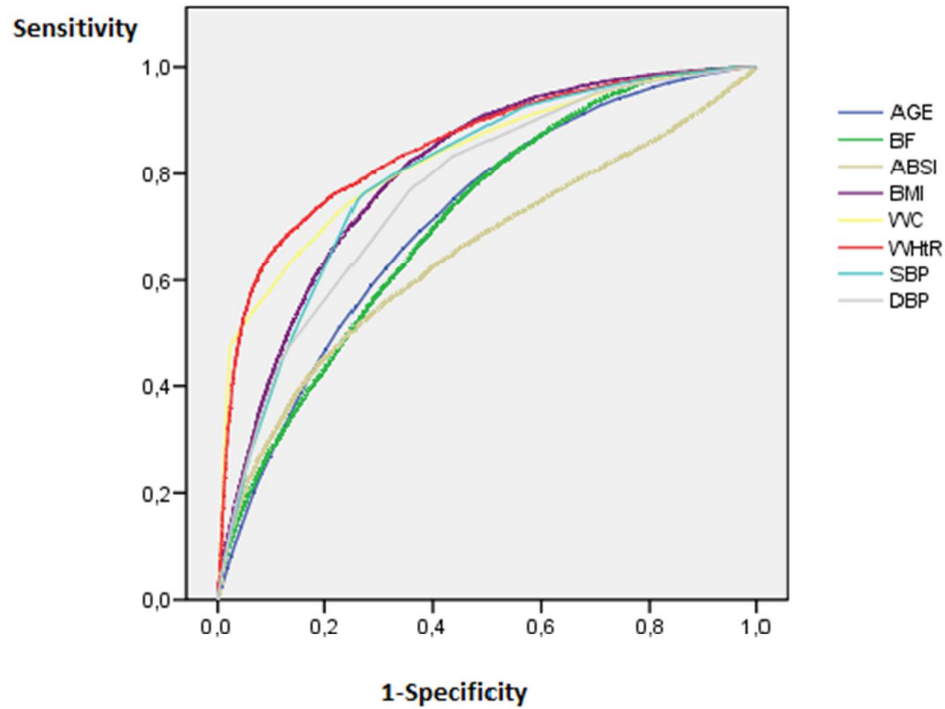

|             | <b>AUC (CI 95%)</b> | <b>CP</b> | <b>Sensitivity (%)</b> | <b>Specificity (%)</b> | <b>JI</b> |
|-------------|---------------------|-----------|------------------------|------------------------|-----------|
| <b>Age</b>  | 0.71 (0.71- 0.72)   | 42.5      | 69.2                   | 62.5                   | 0.317     |
| <b>WHtR</b> | 0.85 (0.84 - 0.86)  | 0.54      | 68.5                   | 87                     | 0.56      |
| <b>WC</b>   | 0.83 (0.82 - 0.84)  | 89.1      | 72.5                   | 77.6                   | 0.5       |
| <b>BMI</b>  | 0.8 (0.8 - 0.81)    | 27.1      | 78.4                   | 68.34                  | 0.47      |
| <b>ABSI</b> | 0.65 (0.64 - 0.66)  | 0.0772    | 50.4                   | 75.2                   | 0.26      |
| <b>BF%</b>  | 0.71 (0.7 - 0.72)   | 29.4      | 70.9                   | 58.1                   | 0.3       |
| <b>SBP</b>  | 0.79 (0.79 - 0.8)   | 127.5     | 75.8                   | 73.5                   | 0.49      |
| <b>DBP</b>  | 0.77 (0.76 - 0.78)  | 78.5      | 77.3                   | 63.9                   | 0.41      |

AUC: Area under curve CP: Cut-off point; JI: Youden Index; BMI: Body mass index; WC: Waist circumference; WHtR: Waist to height ratio; ABSI: A Body Shape Index; BF (%): Body Fat calculated according to the Deurenberg equation; SBP: Systolic Blood Pressure; DBP: Diastolic Blood Pressure.

**Figure 2. WHtR cut-off point resolution**

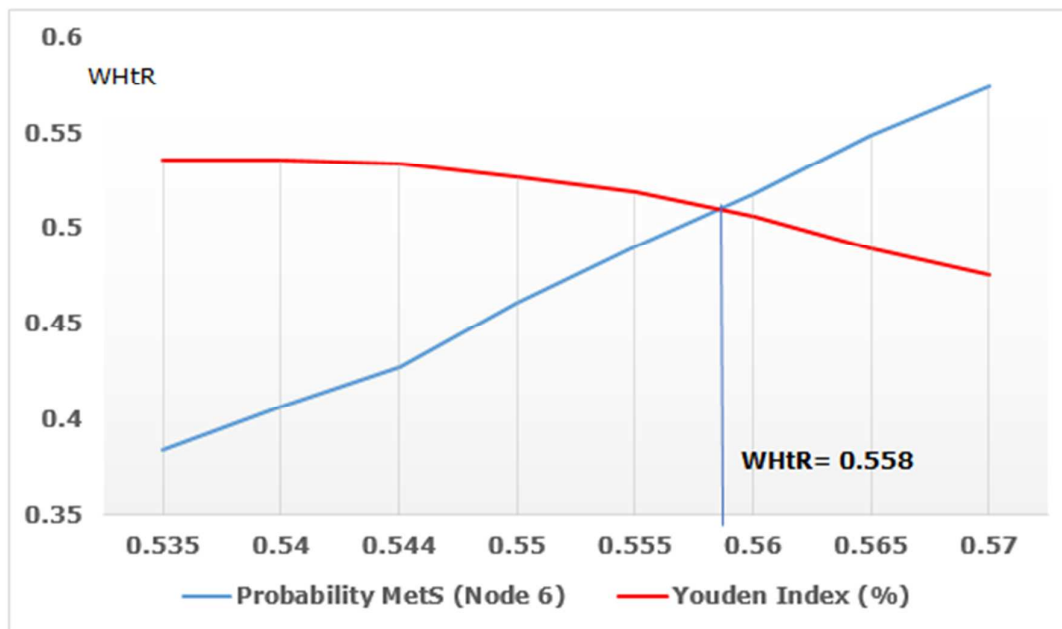

WHtR: Waist to height ratio

Peer review only

Figure 3. Definitive decision tree, new NIM-Mets proposed

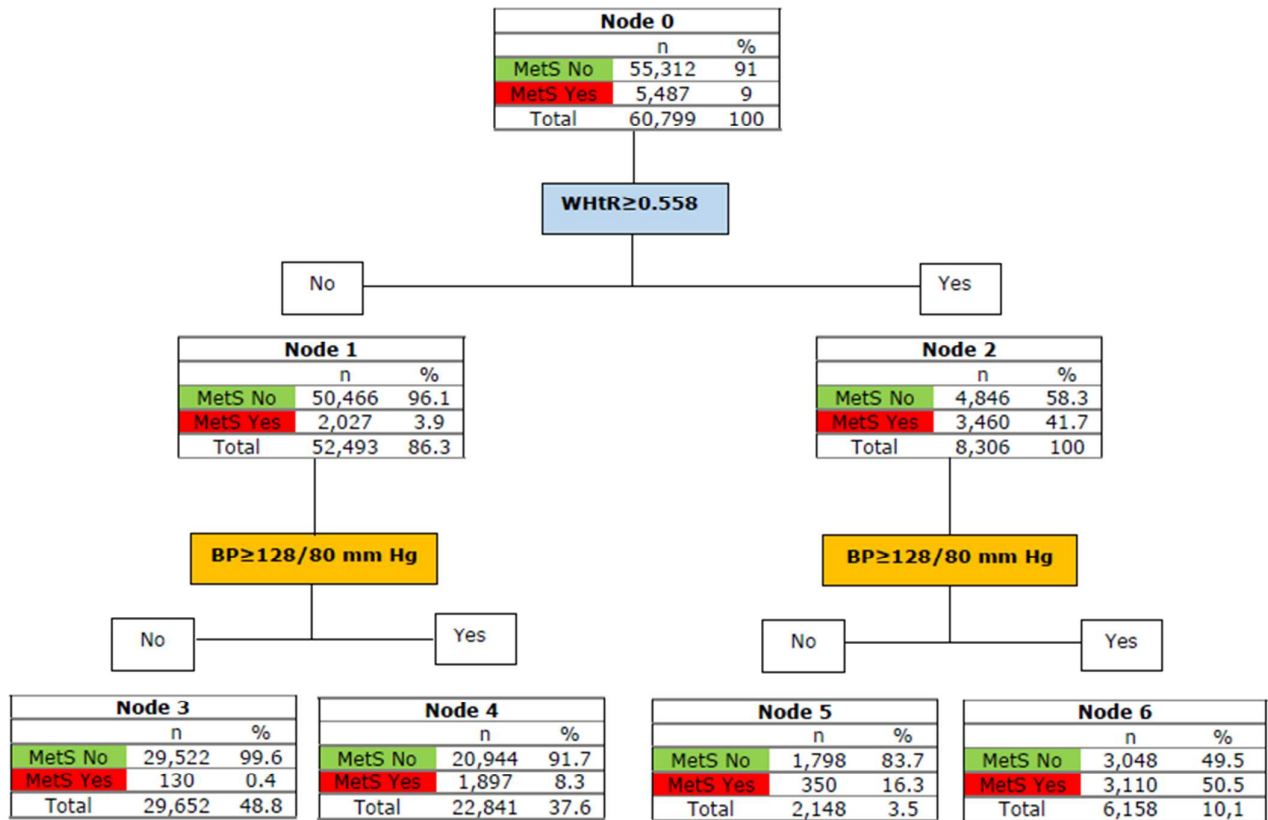

STROBE Statement—Checklist of items that should be included in reports of *cross-sectional studies*

|                           | Item No | Recommendation                                                                                                                                                                                    | Checked in page |
|---------------------------|---------|---------------------------------------------------------------------------------------------------------------------------------------------------------------------------------------------------|-----------------|
| <b>Title and abstract</b> | 1       | (a) Indicate the study's design with a commonly used term in the title or the abstract                                                                                                            | 2               |
|                           |         | (b) Provide in the abstract an informative and balanced summary of what was done and what was found                                                                                               | 2               |
| <b>Introduction</b>       |         |                                                                                                                                                                                                   |                 |
| Background/rationale      | 2       | Explain the scientific background and rationale for the investigation being reported                                                                                                              | 4               |
| Objectives                | 3       | State specific objectives, including any prespecified hypotheses                                                                                                                                  | 5               |
| <b>Methods</b>            |         |                                                                                                                                                                                                   |                 |
| Study design              | 4       | Present key elements of study design early in the paper                                                                                                                                           | 6               |
| Setting                   | 5       | Describe the setting, locations, and relevant dates, including periods of recruitment, exposure, follow-up, and data collection                                                                   | 6               |
| Participants              | 6       | (a) Give the eligibility criteria, and the sources and methods of selection of participants                                                                                                       | 6-7-8           |
| Variables                 | 7       | Clearly define all outcomes, exposures, predictors, potential confounders, and effect modifiers. Give diagnostic criteria, if applicable                                                          | 7-8             |
| Data sources/measurement  | 8*      | For each variable of interest, give sources of data and details of methods of assessment (measurement). Describe comparability of assessment methods if there is more than one group              | 7               |
| Bias                      | 9       | Describe any efforts to address potential sources of bias                                                                                                                                         | 7-8             |
| Study size                | 10      | Explain how the study size was arrived at                                                                                                                                                         | 6               |
| Quantitative variables    | 11      | Explain how quantitative variables were handled in the analyses. If applicable, describe which groupings were chosen and why                                                                      | 6-7-8           |
| Statistical methods       | 12      | (a) Describe all statistical methods, including those used to control for confounding                                                                                                             | 9               |
|                           |         | (b) Describe any methods used to examine subgroups and interactions                                                                                                                               | 9               |
|                           |         | (c) Explain how missing data were addressed                                                                                                                                                       |                 |
|                           |         | (d) If applicable, describe analytical methods taking account of sampling strategy                                                                                                                | 9               |
|                           |         | (e) Describe any sensitivity analyses                                                                                                                                                             | 9               |
| <b>Results</b>            |         |                                                                                                                                                                                                   |                 |
| Participants              | 13*     | (a) Report numbers of individuals at each stage of study—eg numbers potentially eligible, examined for eligibility, confirmed eligible, included in the study, completing follow-up, and analysed | 11              |
|                           |         | (b) Give reasons for non-participation at each stage                                                                                                                                              | 11              |
|                           |         | (c) Consider use of a flow diagram                                                                                                                                                                | Not necessary   |
| Descriptive data          | 14*     | (a) Give characteristics of study participants (eg demographic, clinical, social) and information on exposures and potential confounders                                                          | 11-12           |
|                           |         | (b) Indicate number of participants with missing data for each variable of interest                                                                                                               | none            |
| Outcome data              | 15*     | Report numbers of outcome events or summary measures                                                                                                                                              | 11-12-13        |
| Main results              | 16      | (a) Give unadjusted estimates and, if applicable, confounder-adjusted                                                                                                                             | 12-13-14        |

|                          |    |                                                                                                                                                                            |               |
|--------------------------|----|----------------------------------------------------------------------------------------------------------------------------------------------------------------------------|---------------|
|                          |    | estimates and their precision (eg, 95% confidence interval). Make clear which confounders were adjusted for and why they were included                                     |               |
|                          |    | (b) Report category boundaries when continuous variables were categorized                                                                                                  | 13-14         |
|                          |    | (c) If relevant, consider translating estimates of relative risk into absolute risk for a meaningful time period                                                           | Not indicated |
| Other analyses           | 17 | Report other analyses done—eg analyses of subgroups and interactions, and sensitivity analyses                                                                             | 11-14         |
| <b>Discussion</b>        |    |                                                                                                                                                                            |               |
| Key results              | 18 | Summarise key results with reference to study objectives                                                                                                                   | 16-17-18      |
| Limitations              | 19 | Discuss limitations of the study, taking into account sources of potential bias or imprecision. Discuss both direction and magnitude of any potential bias                 | 18            |
| Interpretation           | 20 | Give a cautious overall interpretation of results considering objectives, limitations, multiplicity of analyses, results from similar studies, and other relevant evidence | 16-17         |
| Generalisability         | 21 | Discuss the generalisability (external validity) of the study results                                                                                                      | 17-18         |
| <b>Other information</b> |    |                                                                                                                                                                            |               |
| Funding                  | 22 | Give the source of funding and the role of the funders for the present study and, if applicable, for the original study on which the present article is based              | 20            |

\*Give information separately for exposed and unexposed groups.

**Note:** An Explanation and Elaboration article discusses each checklist item and gives methodological background and published examples of transparent reporting. The STROBE checklist is best used in conjunction with this article (freely available on the Web sites of PLoS Medicine at <http://www.plosmedicine.org/>, Annals of Internal Medicine at <http://www.annals.org/>, and Epidemiology at <http://www.epidem.com/>). Information on the STROBE Initiative is available at [www.strobe-statement.org](http://www.strobe-statement.org).

| Section & Topic          | No  | Item                                                                                                                                                   | Checked in page |
|--------------------------|-----|--------------------------------------------------------------------------------------------------------------------------------------------------------|-----------------|
| <b>TITLE OR ABSTRACT</b> |     |                                                                                                                                                        |                 |
|                          | 1   | Identification as a study of diagnostic accuracy using at least one measure of accuracy (such as sensitivity, specificity, predictive values, or AUC)  | 2               |
| <b>ABSTRACT</b>          |     |                                                                                                                                                        |                 |
|                          | 2   | Structured summary of study design, methods, results, and conclusions (for specific guidance, see STARD for Abstracts)                                 | 2               |
| <b>INTRODUCTION</b>      |     |                                                                                                                                                        |                 |
|                          | 3   | Scientific and clinical background, including the intended use and clinical role of the index test                                                     | 4               |
|                          | 4   | Study objectives and hypotheses                                                                                                                        | 4-5             |
| <b>METHODS</b>           |     |                                                                                                                                                        |                 |
| <i>Study design</i>      | 5   | Whether data collection was planned before the index test and reference standard were performed (prospective study) or after (retrospective study)     | 6               |
| <i>Participants</i>      | 6   | Eligibility criteria                                                                                                                                   | 6               |
|                          | 7   | On what basis potentially eligible participants were identified (such as symptoms, results from previous tests, inclusion in registry)                 | 6               |
|                          | 8   | Where and when potentially eligible participants were identified (setting, location and dates)                                                         | 6               |
|                          | 9   | Whether participants formed a consecutive, random or convenience series                                                                                | 6               |
| <i>Test methods</i>      | 10a | Index test, in sufficient detail to allow replication                                                                                                  | 7               |
|                          | 10b | Reference standard, in sufficient detail to allow replication                                                                                          | 7               |
|                          | 11  | Rationale for choosing the reference standard (if alternatives exist)                                                                                  |                 |
|                          | 12a | Definition of and rationale for test positivity cut-offs or result categories of the index test, distinguishing pre-specified from exploratory         | 8               |
|                          | 12b | Definition of and rationale for test positivity cut-offs or result categories of the reference standard, distinguishing pre-specified from exploratory | 8               |
|                          | 13a | Whether clinical information and reference standard results were available to the performers/readers of the index test                                 | 8-9             |
|                          | 13b | Whether clinical information and index test results were available to the assessors of the reference standard                                          | 8-9             |
| <i>Analysis</i>          | 14  | Methods for estimating or comparing measures of diagnostic accuracy                                                                                    | 9-10            |
|                          | 15  | How indeterminate index test or reference standard results were handled                                                                                | 9-10            |
|                          | 16  | How missing data on the index test and reference standard were handled                                                                                 | 9-10            |
|                          | 17  | Any analyses of variability in diagnostic accuracy, distinguishing pre-specified from exploratory                                                      |                 |
|                          | 18  | Intended sample size and how it was determined                                                                                                         | 6               |
| <b>RESULTS</b>           |     |                                                                                                                                                        |                 |
| <i>Participants</i>      | 19  | Flow of participants, using a diagram                                                                                                                  | Not indicated   |
|                          | 20  | Baseline demographic and clinical characteristics of participants                                                                                      | 11              |
|                          | 21a | Distribution of severity of disease in those with the target condition                                                                                 | 11-12           |
|                          | 21b | Distribution of alternative diagnoses in those without the target condition                                                                            | 11-12           |
|                          | 22  | Time interval and any clinical interventions between index test and reference standard                                                                 | Not necessary   |
| <i>Test results</i>      | 23  | Cross tabulation of the index test results (or their distribution) by the results of the reference standard                                            | 12              |
|                          | 24  | Estimates of diagnostic accuracy and their precision (such as 95% confidence intervals)                                                                | 12              |
|                          | 25  | Any adverse events from performing the index test or the reference standard                                                                            | None            |
| <b>DISCUSSION</b>        |     |                                                                                                                                                        |                 |
|                          | 26  | Study limitations, including sources of potential bias, statistical uncertainty, and generalisability                                                  | 17-18           |
|                          | 27  | Implications for practice, including the intended use and clinical role of the index test                                                              | 17-18-19        |
| <b>OTHER INFORMATION</b> |     |                                                                                                                                                        |                 |
|                          | 28  | Registration number and name of registry                                                                                                               |                 |
|                          | 29  | Where the full study protocol can be accessed                                                                                                          |                 |
|                          | 30  | Sources of funding and other support; role of funders                                                                                                  | 20              |

# STARD 2015

---

## AIM

STARD stands for “Standards for Reporting Diagnostic accuracy studies”. This list of items was developed to contribute to the completeness and transparency of reporting of diagnostic accuracy studies. Authors can use the list to write informative study reports. Editors and peer-reviewers can use it to evaluate whether the information has been included in manuscripts submitted for publication.

---

## EXPLANATION

A **diagnostic accuracy study** evaluates the ability of one or more medical tests to correctly classify study participants as having a **target condition**. This can be a disease, a disease stage, response or benefit from therapy, or an event or condition in the future. A medical test can be an imaging procedure, a laboratory test, elements from history and physical examination, a combination of these, or any other method for collecting information about the current health status of a patient.

The test whose accuracy is evaluated is called **index test**. A study can evaluate the accuracy of one or more index tests. Evaluating the ability of a medical test to correctly classify patients is typically done by comparing the distribution of the index test results with those of the **reference standard**. The reference standard is the best available method for establishing the presence or absence of the target condition. An accuracy study can rely on one or more reference standards.

If test results are categorized as either positive or negative, the cross tabulation of the index test results against those of the reference standard can be used to estimate the **sensitivity** of the index test (the proportion of participants *with* the target condition who have a positive index test), and its **specificity** (the proportion *without* the target condition who have a negative index test). From this cross tabulation (sometimes referred to as the contingency or “2x2” table), several other accuracy statistics can be estimated, such as the positive and negative **predictive values** of the test. Confidence intervals around estimates of accuracy can then be calculated to quantify the statistical **precision** of the measurements.

If the index test results can take more than two values, categorization of test results as positive or negative requires a **test positivity cut-off**. When multiple such cut-offs can be defined, authors can report a receiver operating characteristic (ROC) curve which graphically represents the combination of sensitivity and specificity for each possible test positivity cut-off. The **area under the ROC curve** informs in a single numerical value about the overall diagnostic accuracy of the index test.

The **intended use** of a medical test can be diagnosis, screening, staging, monitoring, surveillance, prediction or prognosis. The **clinical role** of a test explains its position relative to existing tests in the clinical pathway. A replacement test, for example, replaces an existing test. A triage test is used before an existing test; an add-on test is used after an existing test.

Besides diagnostic accuracy, several other outcomes and statistics may be relevant in the evaluation of medical tests. Medical tests can also be used to classify patients for purposes other than diagnosis, such as staging or prognosis. The STARD list was not explicitly developed for these other outcomes, statistics, and study types, although most STARD items would still apply.

---

## DEVELOPMENT

This STARD list was released in 2015. The 30 items were identified by an international expert group of methodologists, researchers, and editors. The guiding principle in the development of STARD was to select items that, when reported, would help readers to judge the potential for bias in the study, to appraise the applicability of the study findings and the validity of conclusions and recommendations. The list represents an update of the first version, which was published in 2003.

More information can be found on <http://www.equator-network.org/reporting-guidelines/stard>.

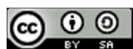

# BMJ Open

## Validation of a non-invasive method for the early detection of metabolic syndrome: a diagnostic accuracy test in a working population

|                                 |                                                                                                                                                                                                                                                                                                                                                                                                                                                                                                                                                                                                                                                                                                                                                                                                                                                                                               |
|---------------------------------|-----------------------------------------------------------------------------------------------------------------------------------------------------------------------------------------------------------------------------------------------------------------------------------------------------------------------------------------------------------------------------------------------------------------------------------------------------------------------------------------------------------------------------------------------------------------------------------------------------------------------------------------------------------------------------------------------------------------------------------------------------------------------------------------------------------------------------------------------------------------------------------------------|
| Journal:                        | <i>BMJ Open</i>                                                                                                                                                                                                                                                                                                                                                                                                                                                                                                                                                                                                                                                                                                                                                                                                                                                                               |
| Manuscript ID                   | bmjopen-2017-020476.R1                                                                                                                                                                                                                                                                                                                                                                                                                                                                                                                                                                                                                                                                                                                                                                                                                                                                        |
| Article Type:                   | Research                                                                                                                                                                                                                                                                                                                                                                                                                                                                                                                                                                                                                                                                                                                                                                                                                                                                                      |
| Date Submitted by the Author:   | 06-Jun-2018                                                                                                                                                                                                                                                                                                                                                                                                                                                                                                                                                                                                                                                                                                                                                                                                                                                                                   |
| Complete List of Authors:       | ROMERO-SALDAÑA, MANUEL; Safety and Occupational Health Tauler, Pedro; Univ Balearic Isl, Fundamental Biology and Health Sciences Vaquero-Abellán, Manuel; University of Córdoba, Department of Occupational Risk Prevention and Environmental Protection López-González, Angel-Arturo; Balearic Islands Health Service, Prevention of Occupational Risks in Health Services Fuentes-Jiménez, Francisco-José; Instituto Maimonides de Investigacion Biomedica de Cordoba, Unid of Lipids Aguiló, Antoni; University of the Balearic Islands, Research Group on Evidence, Lifestyles & Health Álvarez-Fernández, Carlos; City Hall, Córdoba, Department of Occupational Safety and Health Molina-Recio, Guillermo; Univeristy of Córdoba, Department of Nursing, School of Medicine and Nursing Bennesar-Veny, Miquel; University of the Balearic Islands, Nursing and Physiotherapy Department |
| <b>Primary Subject Heading</b>: | Occupational and environmental medicine                                                                                                                                                                                                                                                                                                                                                                                                                                                                                                                                                                                                                                                                                                                                                                                                                                                       |
| Secondary Subject Heading:      | Cardiovascular medicine, Diagnostics, Epidemiology, Public health                                                                                                                                                                                                                                                                                                                                                                                                                                                                                                                                                                                                                                                                                                                                                                                                                             |
| Keywords:                       | metabolic syndrome, early detection, non invasive method, cardiovascular risk, working population                                                                                                                                                                                                                                                                                                                                                                                                                                                                                                                                                                                                                                                                                                                                                                                             |
|                                 |                                                                                                                                                                                                                                                                                                                                                                                                                                                                                                                                                                                                                                                                                                                                                                                                                                                                                               |

SCHOLARONE™  
Manuscripts



1  
2  
3 **Validation of a non-invasive method for the early detection of metabolic**  
4 **syndrome: a diagnostic accuracy test in a working population**  
5  
6  
7

8  
9 **Authors**

10 Manuel Romero-Saldaña<sup>1</sup>, Pedro Tauler<sup>2,3\*</sup>, Manuel Vaquero-Abellán<sup>4</sup>, Angel A.  
11 Lopez-Gonzalez<sup>5</sup>, Francisco José Fuentes-Jiménez<sup>6,7</sup>, Antoni Aguiló<sup>3,8</sup>, Carlos  
12 Álvarez-Fernández<sup>1</sup>, Guillermo Molina-Recio<sup>9</sup>, Miquel Bennasar-Veny<sup>3,7</sup>  
13  
14  
15

16 <sup>1</sup>Department of Occupational Safety and Health, Córdoba City Hall, Córdoba, Spain

17 <sup>2</sup>Department of Fundamental Biology and Health Sciences, University of the Balearic  
18 Islands, Palma, Spain

19 <sup>3</sup>Research Group on Evidence, Lifestyles & Health, Research Institute on Health  
20 Sciences (IUNICS), University of the Balearic Islands, Palma, Spain

21 <sup>4</sup>Department of Occupational Risk Prevention and Environmental Protection,  
22 University of Córdoba, Spain

23 <sup>5</sup>Prevention of Occupational Risks in Health Services, Balearic Islands Health  
24 Service, Palma, Spain

25 <sup>6</sup>IMIBIC, Reina Sofía University Hospital, University of Córdoba, Córdoba, Spain

26 <sup>7</sup>CIBER Physiopathology of Obesity and Nutrition CIBEROBN, ISCIII, Madrid, Spain

27 <sup>8</sup>Nursing and Physiotherapy Department, University of the Balearic Islands, Palma,  
28 Spain

29 <sup>9</sup>Department of Nursing, School of Medicine and Nursing, University of Córdoba,  
30 Spain  
31  
32  
33  
34  
35  
36  
37  
38  
39

40 **\*Corresponding author:** E-mail: pedro.tauler@uib.es Phone: +34971 259960  
41  
42  
43  
44

45 **Keywords:** metabolic syndrome; early detection; non-invasive method;  
46 cardiovascular risk; working population  
47  
48  
49

50 **Word count** (excluding title page, abstract, references, figures and tables): 4,453  
51  
52  
53  
54  
55  
56  
57  
58  
59  
60

## ABSTRACT

**Objectives.** A non-invasive method for the early detection of Metabolic Syndrome (NIM-MetS) using only Waist to Height Ratio (WHtR) and Blood Pressure (BP) has recently been published, with fixed cut-off values for gender and age. The aim of this study was to validate this method in a large sample of Spanish workers.

**Design.** A diagnostic test accuracy to assess the validity of the method was performed.

**Setting.** Occupational Health Services.

**Participants.** The studies were conducted in 2012-2016 on a sample of 60,799 workers from the Balearic Islands (Spain).

**Interventions.** The NCEP-ATP III criteria were used as the gold standard. NIM-MetS has been devised using classification trees (the CHAID, Chi-squared Automatic Interaction Detection method).

**Main outcome measures.** Anthropometric and biochemical variables to diagnose MetS. Sensitivity, specificity, validity index and Youden Index were determined to analyse the accuracy of the diagnostic test (NIM-MetS).

**Results.** Regarding the validation of the method, sensitivity was 54.7%, specificity 94.9% and validity index 91.2%. The cut-off value for WHtR was 0.54, ranging from 0.51 (lower age group) to 0.56 (higher) in the age groups. Variables more closely associated with MetS were WHtR (AUC=0.85; 95% CI: 0.84-0.86) and Systolic Blood Pressure (AUC=0.79; 95% CI: 0.78-0.80). The final cut-off values for the non-invasive method were  $WHtR \geq 0.56$  and  $BP \geq 128/80$  mmHg, which includes four levels of MetS risk (very low, low, moderate and high).

**Conclusions.** The analysed method has shown a high validity index (higher than 91%) for the early detection of MetS. It is a non-invasive method easy to apply and interpret in any health care setting. This method provides a scale of MetS risk which allows a more accurate detection and a more effective intervention.

### Strengths and limitations of this study

- This is the first study assessing the validation of a non-invasive method for the early detection of metabolic syndrome (NIM-MetS).
- A diagnostic test study has been carried out in a large sample of healthy workers.
- MetS was ascertained by using the NCEP-ATP III definition, but there is a lack of consensus regarding MetS definition.
- A new procedure to measure MetS using variables with universal cut-off points (waist to height ratio and blood pressure) is suggested.
- The NIM-MetS method has shown high specificity, but low sensitivity.

## INTRODUCTION

The obesity epidemic which currently affects the world population has resulted in a general increase in the prevalence of metabolic syndrome (MetS).<sup>1-3</sup> Overweight and obesity are factors related to the onset of type 2 diabetes, hypertension, dyslipidemia and cardiovascular diseases (CVD). In particular, central obesity, which is defined as an excessive accumulation of abdominal fat, is an important predictor of cardiovascular risk and MetS.<sup>4,5</sup> Metabolic syndrome is defined as a pluripathological state characterized by the joint presence of several cardiovascular risk factors such as abdominal obesity, high blood pressure and altered glucose and lipid metabolism (low HDL-cholesterol and high triglycerides).<sup>6</sup>

Although there are several analytical/instrumental techniques for measuring the amount and distribution of body fat, there is no consensus about which the ideal method to calculate central adiposity is, nor how to decide which cut-off points provide greater accuracy, efficiency, sensitivity and specificity in all cases.<sup>7,8</sup>

A simple and inexpensive alternative to these instruments as a way of quantifying abdominal fat is to make anthropometric measurements of central obesity<sup>9</sup>. Waist circumference (WC), body mass index (BMI), waist to height ratio (WHtR), waist to hip ratio (WHR), hip to height ratio (HHR), body adiposity index (BAI), visceral adiposity index (VAI), body shape index (ABSI) and percentage of body fat (%BF) are some examples that can be found in numerous epidemiological studies, in which they try to relate indirectly intra-abdominal (visceral) fat with parameters such as morbidity and mortality, and also with prevalence of hypertension, diabetes, MetS, etc.<sup>10-13</sup>

Since the mid-1990s, the WHtR has been the most widely used anthropometric indicator and the one which has obtained the best predictive results for cardiovascular risk.<sup>14</sup> In a previous publication, a non-invasive method for early detection of MetS (NIM-MetS) using only two anthropometric variables (WHtR and blood pressure (BP)) has been proposed and validated.<sup>15</sup> This method suggests

1  
2  
3 WHtR $\geq$ 0.55 as the predictive threshold for the early detection of MetS for both men  
4 and women and, also, for any age stratum.  
5

6 The aim of this study is to validate the NIM-Mets method in a large  
7 representative sample of Spanish workers, to determine its predictive ability and to  
8 find out the stability of the cut-off value of WHtR $\geq$ 0.55 by gender and age.  
9  
10  
11  
12

## 13 14 **MATERIAL AND METHODS**

### 15 *Design and sample*

16 A diagnostic test using a cross-sectional study was carried out on a working  
17 population from the Balearic Islands (Spain) between 2012 and 2016. Subjects  
18 participating in the study were randomly selected during their work health periodic  
19 assessments. Every day, each worker was assigned a number and half of the  
20 examined workers were randomly selected using a random number table. A total of  
21 69,581 workers were invited to participate in the study. However, 8,782 (12.6%)  
22 refused to participate and, thus, the final number of participants was 60,799  
23 workers (10.2% of the active population) belonging to different economic sectors  
24 (public administration, health services, etc.), aged 20 to 70 years old, and with  
25 57.3% of males and 42.7% of females.  
26  
27  
28  
29  
30  
31  
32  
33  
34  
35  
36

37 Participants were informed of the purpose of the study before they provided  
38 written informed consent to participate. The study protocol complied with the  
39 Declaration of Helsinki for conducting medical research involving human subjects,  
40 and was approved by the Institutional Review Board of the Mallorca Health  
41 Management Ethical Review Committee of GESMA.  
42  
43  
44  
45  
46  
47  
48

### 49 *Data collection and definition of variables*

50 To carry out the anthropometric measurements, recommendations contained in  
51 the manual "International Standards for Anthropometric Assessment (ISAK)" were  
52 followed.<sup>16</sup> All the measurements were made by specifically trained staff in order to  
53  
54  
55  
56  
57  
58  
59  
60

1  
2  
3 minimize the variation coefficients. Each measurement was performed three times,  
4 taking the average as the final value.  
5

6 The independent variables were classified into the following categories:

- 7  
8 a) Personal and health habits: gender, age and tobacco consumption.  
9  
10 b) Anthropometric measurements:  
11  
12 • Waist circumference (WC) in cm.  
13  
14 • Body mass index (BMI), calculated as body weight (kg) divided by height  
15 (m) squared, in kg/m<sup>2</sup>.  
16  
17 • Percentage of body fat (%BF), calculated according to the Deurenberg  
18 equation: %BF = 1.2x(BMI) + 0.23x(Age in years) - 10.8x(Gender) - 5.4.  
19  
20 Gender: females (0), males (1)  
21  
22 • Waist-to-height ratio (WHtR), calculated as waist circumference divided by  
23 height, both in cm.  
24  
25 • Body shape index (ABSI), calculated as  $WC/[(BMI)^{2/3}(height)^{1/2}]$ .  
26  
27 c) Blood measurements:  
28  
29 • Systolic blood pressure (SBP) in mmHg.  
30  
31 • Diastolic blood pressure (DBP) in mmHg.  
32  
33 • Total Cholesterol (mg/dL), LDL-Cholesterol (mg/dL), HDL-Cholesterol  
34 (mg/dL), glucose (mg/dL) and triglycerides (mg/dL).  
35  
36  
37  
38

39 Body weight was measured to the nearest 0.1 kg with an electronic scale (Seca  
40 700 scale, Seca GmbH, Hamburg). Height was measured to the nearest 0.5 cm with  
41 a stadiometer (Seca 220 (CM) Telescopic Height Rod for Column Scales, Seca  
42 GmbH, Hamburg). Waist circumference was measured half-way between the lower  
43 costal border and the iliac crest. The measurement was taken at the end of a  
44 normal expiration with the subject standing up, with their feet together and their  
45 arms hanging down by their sides.  
46  
47  
48  
49  
50  
51

52 Venous blood samples were taken from the antecubital vein in suitable  
53 vacutainers without anticoagulant in order to obtain serum. The blood samples  
54 were taken after a 12 h overnight fast. Participants sat and rested for at least 15  
55  
56  
57

1  
2  
3 minutes before the blood samples were taken. Serum was obtained after  
4 centrifugation (15 min, 1,000xg, 4°C) of the blood samples. The serum was stored  
5 at -20°C and analyses were performed within 3 days. Concentrations of glucose,  
6 cholesterol and triglycerides were measured in serum following the standard  
7 procedures used in clinical biochemistry laboratories with an autoanalyser  
8 (SYNCHRON CXH9 PRO, Beckman Coulter, Brea, CA, USA).  
9

10  
11  
12  
13  
14 Blood pressure was determined after the subjects had rested in the supine  
15 position for 10 minutes, using an automatic and calibrated sphygmomanometer  
16 (OMRON M3, OMRON Healthcare Europe, Spain). As in the case of the  
17 anthropometrical measurements, blood pressure was measured three times,  
18 leaving a one-minute gap between each measurement, and the average value was  
19 then calculated.  
20  
21  
22  
23  
24

25  
26 Presence of MetS was ascertained by using the criterion suggested by the  
27 NCEP-ATP III definition (when 3 of 5 of the following characteristics are present, a  
28 diagnosis of metabolic syndrome can be made):  
29  
30

- 31 • Abdominal obesity (WC $\geq$ 102 cm in males and WC  $\geq$ 88 cm in females).
- 32 • Triglycerides  $\geq$ 150 mg/dL.
- 33 • HDL-cholesterol <40 mg/dL in males and <50 mg/dL in females.
- 34 • Blood pressure  $\geq$ 130/85 mmHg.
- 35 • Fasting glucose  $\geq$ 100 mg/dL.
- 36
- 37
- 38
- 39
- 40
- 41
- 42
- 43
- 44

#### 45 *Non-invasive method for the early detection of Mets (NIM-MetS)*

46 NIM-Mets is a new tool for screening for MetS based on the following  
47 anthropometric variables and cut-off values: WHtR $\geq$ 0.55 and BP $\geq$ 128/85 mmHg.

48 This method classifies the population into two groups with different levels of risk:

- 49 • Workers with high risk of MetS (probability>61.7%): this group would  
50 contain those subjects with both positive variables, i.e. WHtR $\geq$ 0.55 and  
51 BP $\geq$ 128/85 mmHg.  
52  
53  
54  
55  
56  
57  
58  
59  
60

- Workers with low risk of MetS (probability of 0.5-16.9%): this group would contain those subjects who have any of the other possible combinations between the two variables considered.

## Statistical Analysis

Statistical analysis was carried out using the IBM SPSS Statistics 22.0 software (SPSS / IBM, Chicago, IL, USA) and the Epidat version 4.2. (Department of Sanidade, Xunta de Galicia, Galicia, Spain). Continuous data are presented as mean values, standard deviation, and confidence interval at 95%. Categorical data are shown as frequency counts and percentages. All the data were tested for their normal distribution (Kolmogorov–Smirnov test with the Lilliefors adjustment).

Student's t-test and U Mann-Whitney test were used in the bivariate analyses for normal and non-normal distributed variables respectively. ANOVA tests with the post-hoc Bonferroni contrast method were carried out when more than two groups were considered in the analysis. The Levene test was used to determine the variance equality. The  $\chi^2$  test was applied to assess differences between groups in categorical variables.

Receiver Operator Characteristic (ROC) curves were performed and the Area Under the Curve (AUC) was calculated to find which explanatory variables best predict the onset of MetS. We obtained the cut-off value for each explanatory variable through the Youden index (JI) as  $JI = \text{Sensitivity} + \text{Specificity} - 1$ .

To measure the accuracy of the diagnostic test, sensitivity (S), specificity (SP), positive and negative predictive values (PPV and NPV), likelihood ratios (LH+ and LH-), validity index (VI) and JI were analysed. Validity index was calculated as the quotient between the sum of true positives and true negatives, divided by the total number of subjects, therefore representing the percentage of subjects properly classified by the test.

The modification of NIM-MetS was obtained from a clinical decision tree (classification) using the CHAID (Chi-squared Automatic Interaction Detection)



1  
2  
3 technique as a growth method. The statistical significance level for splitting nodes  
4 and merging categories was  $p < 0.05$ , and significance values were corrected by the  
5 Bonferroni method, with a maximum number of iterations of 2,000.  
6  
7

8 The level of statistical significance was fixed in all the contrasts for an alpha  
9 error below 5%, and the confidence intervals were calculated with a 95% level of  
10 confidence.  
11  
12  
13

#### 14 Patient and public involvement

15  
16  
17  
18 Patients were not involved in setting the research question and in the study design.  
19 All patients were randomly selected during their work health periodic assessments  
20 to participate in the study and they were interviewed face-to-face by trained  
21 researchers for detailed explanation of the purpose of this research and informed  
22 consent at the beginning. No patients were involved in data analysis or in the  
23 manuscript writing. Results of the research will not be disseminated to the patients.  
24  
25  
26  
27  
28  
29  
30  
31

## 32 **RESULTS**

### 33 *Characteristics of the study sample*

34  
35  
36 Of the 60,799 workers, 34,827 were male (57.3%). The overall mean age was  
37 40 years (39.9-40.1) (Table 1). Among anthropometrical and blood parameters  
38 shown in Table 1, women showed higher %BF and HDL-Cholesterol values  
39 ( $p < 0.001$ ), while men showed significant higher values for the rest of the  
40 parameters shown in this table. The prevalence of smokers was 34.8% (36.6% in  
41 men and 32.5% in women), and 17.6% of participants were obese (20% in men  
42 and 14.4% women). With regard to drug treatments, 6.6% of participants were  
43 undergoing antihypertensive treatment, 3.2% lipid lowering treatments and 1.7%  
44 antidiabetic treatments. Finally, the overall prevalence of MetS was 9.0%, with  
45 11.8% in men and 5.4% in women ( $p < 0.001$ ).  
46  
47  
48  
49  
50  
51  
52  
53  
54  
55  
56  
57  
58  
59  
60

### *NIM-MetS validation*

Table 2 shows the results of diagnostic tests after applying the NIM-Mets method compared with NCEP-ATP III as a control test. Overall, the indicators of the NIM-MetS method validation were as follows: S = 54.7% (53.4-56.0), SP = 94.9% (94.7-95.0), and VI = 91.2% (91.0-91.5). The sensitivity was higher in men (59.4%) than in women (40.9%).

As regards the NIM-MetS safety indicators, results in the total sample were: PPV = 51.3% (50.0-52.6) and NPV = 95.5 (95.3-95.7). By gender, PPV was higher in men (51.4%) than in women (50.8%), while NPV was higher in women (96.7%) than in men (94.5%). Finally, the overall JI was 0.5 (0.48 to 0.51), higher in men (0.52) than in women (0.39).

A second question to be dealt with in this research was to compare the cut-off value for WHtR proposed by NIM-MetS with that obtained in the study sample, and thus determine its variability according to the gender variable and in different age groups (Table 3). In the whole sample ( $n = 60,799$ ), a cut-off value of 0.54 was obtained for WHtR. In the group of men ( $n = 34,827$ ), the resulting threshold was 0.56, while for women ( $n = 25,972$ ) it was 0.53.

It can be seen how the cut-off point increases with age. For men, it ranged from 0.55 (20-30 years old) to 0.56 ( $\geq 51$  years), whereas for women it was between 0.51 (20-30 years) and 0.55 ( $\geq 51$  years). The differences between the cut-off values for men and women become narrower as the age increased.

Figure 1 shows the results for the anthropometric variables' ROC curves. WHtR achieved the highest AUC 0.85 (95% CI: 0.84 to 0.86), with a cut-off value of 0.54, reaching top values of S = 68.5%, SP = 87.0% and JI = 0.56. The second variable with the highest AUC was WC, with 0.83 (95% CI: 0.82 to 0.84), a cut-off value of 89.1 cm and S = 72.5, SP = 77.6% and JI = 0.5. BMI with an AUC = 0.8 BMI and SBP with AUC = 0.79 also stood out.

1  
2  
3 **Figure 1.** Anthropometric variables. ROC curves, area under the curve, cut-off  
4 points and efficacy indicators.  
5  
6  
7

8  
9  
10 After that, different clinical decision trees were made with a range of cut-off  
11 values for WHtR and BP (Table 4). Thus, the range of cut-offs for WHtR was defined  
12 by 8 thresholds between 0.54 and 0.57, and included, among others, the cut-off  
13 value proposed by NIM-MetS ( $\text{WHtR} \geq 0.55$ ) and the cut-off value for the total  
14 sample ( $\text{WHtR} \geq 0.54$ ). In addition, three models were established for BP:  
15  $\text{BP} \geq 128/80$  mmHg (cut-off values obtained for SBP and DBP as ROC curves, shown  
16 in Figure 2);  $\text{BP} \geq 128/85$  mmHg (BP cut-off values proposed by NIM-MetS); and  
17 finally, only  $\text{SBP} \geq 128$  mmHg (second covariate with the highest adjusted OR in the  
18 multiple logistic regression). In this way, 24 clinical decision trees were set up using  
19 CHAID methodology. Each tree comprised of a parent node (Node 0), two primary  
20 subsidiary nodes (Nodes 1 and 2) and four secondary subsidiary nodes (Nodes 3, 4,  
21 5 and 6). Each of the last four nodes denoted the probability of having MetS. Thus,  
22 Node 3 corresponds to the probability that a worker has MetS when both  
23 anthropometric variables are negative (below cut-off values). Node 4 indicates the  
24 probability that a worker has MetS when BP is above the cut-off value and WHtR  
25 below. Node 5 represents the probability that a worker has MetS when BP is lower  
26 than the cut-off value and WHtR is above. Finally, Node 6 shows the probability  
27 that a worker suffers from MetS when both variables are positive (above the cut-off  
28 values). The model  $\text{BP} \geq 128/80$  mmHg was chosen because it had the highest  
29 Youden index value (greatest sensitivity and specificity combined) at each of the  
30 WHtR cut-off points (Table 4).  
31  
32  
33  
34  
35  
36  
37  
38  
39  
40  
41  
42  
43  
44  
45  
46  
47  
48  
49

50 **Figure 2.** WHtR cut-off point resolution.  
51  
52  
53

54 The next step was to select the final cut-off value for WHtR. To do this, the  
55 method's probability of detection (Node 6 value) and the Youden index for the BP  
56  
57

1  
2  
3 model chosen ( $BP \geq 128 / 80$  mmHg) were plotted for each WHtR cut-off value  
4  
5 (Figure 2).

6  
7 It was noted that the probability of detection of MetS in each tree (Node 6  
8 value) and the WHtR threshold, as well as the Youden index and the WHtR  
9 threshold, follow linear functions, in which the equations of its lines are as follows:

- 10  
11 • Probability MetS (Node 6) =  $5.534 * WHtR - 2.58$
- 12  
13 • Youden index =  $-1.758 * WHtR + 1.486$

14  
15  
16 Thus, the final threshold value for WHtR was determined by the cut-off point of  
17 both lines:  $WHtR = 0.56$  (Figure 2).

18  
19 The resulting new method for the early detection of MetS (new NIM-MetS)  
20 includes these conditions:  $WHtR \geq 0.56$  and  $BP \geq 128/80$  mmHg. Figure 3 shows the  
21 decision tree created from these variables and cut-off points. The sensitivity of the  
22 proposed method was 56.4%, specificity was 94.5%, validity index was 91.1% and  
23 the Youden index 0.51.  
24  
25  
26  
27  
28  
29  
30

31 **Figure 3.** Definitive decision tree, new NIM-Mets proposed.  
32  
33  
34

35 Finally, from the probabilities obtained in Nodes 3, 4, 5 and 6, a risk gradient  
36 for MetS was developed, according to the WHtR and BP covariates and the  
37 proposed cut-off values. Thus, those subjects with lower WHtR and BP values than  
38 the cut-off point have a very low probability of suffering from MetS ( $p_{MetS} =$   
39  $0.4\%$ ). Low risk ( $p_{MetS} = 8.3\%$ ) would be found only in those individuals with BP  
40 values over  $128/80$  mmHg but low WHtR. A moderate level of risk ( $p_{MetS} =$   
41  $16.3\%$ ) would include normotensive subjects who had a  $WHtR \geq 0.558$ . Finally,  
42 subjects with  $WHtR \geq 0.56$  and  $BP \geq 128/80$  mmHg, would have a 50.5% risk of  
43 having MetS.  
44  
45  
46  
47  
48  
49  
50  
51  
52  
53

## 54 **DISCUSSION**

55  
56  
57  
58  
59  
60

1  
2  
3 The validation of a non-invasive method for the early detection of MetS (NIM-  
4 MetS) has been determined. The validation was carried out from a study of  
5 diagnostic tests conducted in Spanish Caucasian adult workers and using, as a  
6 reference test, the NCEP-ATP III criteria for the diagnosis of MetS. The early  
7 detection of MetS is the key to improving the quality of life of our population, since  
8 it prevents the appearance of associated complications such as CVD, type 2  
9 Diabetes Mellitus and, even, cancer.<sup>17-20</sup>

10  
11  
12  
13  
14  
15  
16 NIM-MetS has shown a high validity index both in men (88.6%) and in women  
17 (94.7%). Overall, for every 100 workers, the method classified properly 91 cases.  
18 Similarly, NIM-MetS has proved to be highly specific, reaching an overall specificity  
19 of 94.9% (92.5% in men and 97.8% in women). Both VI and the SP recorded  
20 values above those achieved by this method in another Spanish population,<sup>15</sup> where  
21 it obtained an IV = 89.5% and 91.5% specificity. For sensitivity, the overall figure  
22 was 56.4% (59.4% for men and 40.9% for women), while in the original  
23 population, the overall sensitivity was 77.9%. Because it supposes a simple, easy  
24 to apply even in large populations and non-invasive method, it could be defined as  
25 a useful method in spite of the sensitivity found in the present study could be  
26 considered as moderate. The high specificity together with the high validity index  
27 shown for the screening of the cardiometabolic risk are characteristics that increase  
28 the acceptability of the method.

29  
30  
31  
32  
33  
34  
35  
36  
37  
38  
39  
40  
41 Although the indicators of validation and accuracy of a screening test  
42 (sensitivity and specificity) are intrinsic properties of the test itself and do not  
43 depend on the prevalence of the disease considered, this does not prevent these  
44 indicators from being affected by characteristics of the population they are applied  
45 to.<sup>21</sup> In fact, the most common observation is that a test for early detection or  
46 diagnosis alters its sensitivity and specificity depending on these characteristic  
47 features of the population. Therefore, the main differences between the two  
48 populations (the Balearic and the one considered in the previous study developed in  
49 Cordoba<sup>15</sup>) were analysed, highlighting those features of the Balearic population

1  
2  
3 which contributed to a decreased sensitivity: a younger population (40.0 vs. 45.1  
4 years), more females (42.7% vs. 32.1%), more smokers (34.8% vs. 28.6%) and  
5 lower values for WC (82.9 vs. 87.8 cm), WHtR (0.49 vs. 0.52) and BMI (26.1 vs.  
6 26.5 kg/m<sup>2</sup>).  
7  
8  
9

10 As regards the safety indicators of the test, the positive and negative predictive  
11 values, they are definitely affected by the prevalence of the population, lowering  
12 the PPV when the prevalence of MetS is lower. In this way, although we found a  
13 lower prevalence of MetS in the Balearic Islands than in Cordoba (9% vs. 13.9%),  
14 the NIM-Mets produced a lower PPV in the Balearic Islands (51.3% vs. 61.7%),  
15 while the negative predictive value remained very similar (95.5% vs. 95.9%).  
16  
17  
18  
19  
20  
21

22 Screening tests are often used in clinical practice. However, there are very few  
23 methods for the early detection of MetS other than the currently known diagnostic  
24 criteria, and there are even fewer non-invasive screening tests. A study in the  
25 Republic of Korea examined the validity of a test for the early detection of MetS  
26 based on the muscle-to-fat ratio.<sup>22</sup> The study was conducted on 6,256 participants,  
27 with a sensitivity of 68.6% in men and 76% in women, and a specificity of 63.8%  
28 in men and 53.8% in women. Miller et al.<sup>23</sup> proposed a screening method for MetS  
29 in 745 young adults (18-29 years old) in the United States, based on making  
30 decision trees with the CHAID methodology and using all the criteria for MetS. The  
31 method had a validity rate of 89.4% and a sensitivity rate of 61.7%. Finally, De  
32 Kroon et al.<sup>24</sup> conducted a screening test for MetS in 642 young people (aged 17-  
33 28) in the Netherlands using anthropometric variables (BMI, WC and BP). The  
34 sensitivity of the method was 68.75% and the validity index was 95.6%.  
35  
36  
37  
38  
39  
40  
41  
42  
43  
44  
45

46 Another hypothesis put forward in this research was to test whether the cut-off  
47 value proposed by NIM-MetS for WHtR ( $\geq 0.55$ ) would be reproduced in a large  
48 sample (60,799 workers from the Balearic Islands), and if it was also valid for both  
49 men and women and also for different age groups. WHtR had a cut-off value of  
50 0.54 for the total sample, with 0.56 men and 0.53 for women. As regards age  
51  
52  
53  
54  
55  
56  
57  
58  
59  
60

1  
2  
3 groups, the WHtR threshold increased with age, with 0.55-0.56 for men and 0.51-  
4 0.55 for women. These differences were reduced in the total sample (0.53-0.56).

5  
6 It is noteworthy that several authors have proposed a universal 0.50 cut-off  
7 point for WHtR, both to detect MetS and to predict cardiometabolic risk and overall  
8 cardiovascular mortality.<sup>25-28</sup> However, in Spain, a cross-sectional study in the  
9 general population (n = 6,279, mean age = 43 years) showed that WHtR was the  
10 best anthropometric predictor of MetS (NCEP-ATP III), and the authors proposed a  
11 cut-off value of 0.55, with which they obtained a sensitivity of 91% and a specificity  
12 of 64%.<sup>28</sup> This cut-off value is very similar to the one proposed from the results  
13 obtained in the present study.

14  
15 In Chile, two important child population studies were conducted by Arnaiz et  
16 al., showing results which match the value of the cut-off point proposed in the  
17 present study. Thus, in the first study, conducted on 209 schoolchildren (mean age  
18 of 11.5), the authors obtained a cut-off value of 0.55 WHtR for MetS,<sup>29</sup> while in the  
19 second study, performed in 2,980 children aged 6-14 (mean age of 9.9), the  
20 authors concluded that the WHtR did not change with age and gender and,  
21 therefore, a universal cut-off value could be agreed for both children and adults.<sup>30</sup>

22  
23 The prospective study by Koch et al.<sup>31</sup> carried out in Chile on about 6,714 men  
24 and 6,340 women, evaluating the relationship between various anthropometric  
25 indices of adiposity, cardiovascular risk factors and mortality for a cut-off value of  
26 0.55 obtained a sensitivity of 75.8 % and a specificity of 73.3% for men, and a  
27 sensitivity of 77.6% and specificity of 56.3% for women.

28  
29 In addition, several investigations conducted in non-European and non-Hispanic  
30 populations also concur on this threshold of WHtR for MetS. Thus, Obeidat et al.<sup>32</sup> in  
31 a study on a Jordanian population (n=630, aged 20-70 years) reported a cut-off  
32 value of 0.56 in men and 0.52 in women; in India, Rajput et al.,<sup>33</sup> achieved a  
33 threshold of 0.52 for men and women (n = 3,042) in all locations (rural or urban  
34 areas); and in China, He et al.,<sup>34</sup> in a descriptive study of 1,068 adult subjects,  
35 reported a cut-off value for WHtR of 0.5 for men and women alike.

1  
2  
3 When the NIM-MetS method was applied in this new larger sample of 60,799  
4 workers from the Balearic Islands, the method has showed again the same  
5 variables obtained in the original study performed in Cordoba.<sup>15</sup> In the multiple  
6 logistic regression, WHtR and BP achieved the highest adjusted OR values. Thus,  
7 WHtR was the anthropometric index that best discriminated MetS presence, with an  
8 adjusted OR value of 4.4 (3.9-4.9), while SBP obtained an adjusted OR value of 3.8  
9 (3.5-4.1). In addition, the cut-off values obtained for WHtR and for BP are very  
10 similar to those of the original method.  
11  
12  
13  
14  
15  
16  
17

18 Several investigations have confirmed the high predictive ability of WHtR for  
19 MetS and CVD. In the systematic review conducted by Ashwell et al.,<sup>35</sup> in which 10  
20 out of the 31 studies analysed the association between anthropometric  
21 measurements of central obesity and MetS, WHtR had the highest AUC value 0.76  
22 (men) and 0.75 (women). This contrasted with WC, which obtained an AUC value of  
23 0.75 (equal for men and women) and BMI, with an AUC value of 0.72 (men and  
24 women). Similarly, a meta-analysis conducted by Savva et al.,<sup>36</sup> in which 8 out of  
25 the 24 studies included compared WHtR (cut-off point 0.5) with BMI (cut-off point  
26 of 23 for the Asian population and 25 for the rest) for cardiometabolic risk in an  
27 Asian and non-Asian population, and concluded that WHtR showed a stronger  
28 association with MetS than with BMI.  
29  
30  
31  
32  
33  
34  
35  
36  
37  
38

39 Through the present study, the NIM-MetS method has been reproduced, and  
40 definitive cut-off values have been proposed for WHtR (0.56) and BP (128-80  
41 mmHg), from which a sensitivity rate of 56.4%, a specificity rate of 94.5%, a  
42 validity index of 91.1% and a Youden index of 0.51 are obtained. On the other  
43 hand, finally, the long-term ability of MetS to predict CVD has shown to be limited  
44 by the dichotomous (binary) and qualitative nature of the classic diagnostic criteria  
45 for MetS. An innovative aspect that NIM-MetS brings is to provide a gradient or  
46 scale of risk of developing MetS which is divided into four risk levels: Very low risk  
47 (probability = 0.4%), low risk (probability = 8.3%), moderate risk (probability =  
48 16.4%) and high risk (probability = 50.5%). In this way, health professionals can  
49  
50  
51  
52  
53  
54  
55  
56  
57



1  
2  
3 take certain steps depending on the level of risk of MetS and promote a more  
4 accurate and early detection of the possible complications associated with CVD and  
5 MetS. Along the same lines, there have been several studies using methods based  
6 on scores to quantify the amount of risk accumulated by the presence of the  
7 components that define the metabolic syndrome (Metabolic Syndrome Severity  
8 Score).<sup>37,38</sup>  
9  
10  
11  
12  
13  
14  
15

### 16 *Limitations*

17  
18 This study presents some limitations that must be acknowledged. First, we  
19 must bear in mind that there are different definitions and criteria to determine the  
20 presence of MetS. In this study, presence of MetS was ascertained using the NCEP-  
21 ATP III definition as a gold standard, which supposes one of the definitions most  
22 used and widely accepted by the international community and the WHO. In  
23 addition, the study data refers to Caucasian population. Thus, results could not  
24 have great applicability to other populations.  
25  
26  
27  
28  
29  
30

31 Although in the present study NIM-MetS methodology has been tested in a very  
32 large sample of workers, the sensitivity found was lower than that obtained in the  
33 original study leading to the proposal of the method.<sup>15</sup> This could be related to  
34 differences in the study samples, with the workers from the Balearic Islands  
35 showing lower prevalence of SMet and obesity and being younger. Although the  
36 prevalence of MetS does not affect sensitivity and specificity, this lower prevalence  
37 influences PPV and NPV.  
38  
39  
40  
41  
42  
43  
44

45 In spite of the percentage of participation is high (87.4%), we should take into  
46 account that it is not the total target population and, therefore, a bias could have  
47 been introduced in the results. Furthermore, participants highly concerned about  
48 their health, and thus probably healthier, along with those with a diagnosed  
49 disease, could represent the greater proportion of workers attending health  
50 examinations because these were not compulsory. This causes bias in the  
51 recruitment procedure as, in addition, it is not well-known whether the healthier  
52  
53  
54  
55  
56  
57  
58  
59  
60

1  
2  
3 workers or the ones with a diagnosed disease are the ones with the greatest  
4 interest in the checks. Nor can we ignore the bias of the healthy worker, since  
5 those workers with serious illnesses would not be currently active. In addition, it is  
6 not well known if the healthiest workers or those with a diagnosed illness have the  
7 greatest interest in checks.  
8  
9  
10  
11  
12

### 13 **Conclusions**

14  
15  
16 The NIM-MetS has proved to be a valid method for the early detection of MetS  
17 in a healthy worker population. It is a simple, economical and quick non-invasive  
18 test which is easy to apply and interpret in any health care setting (primary health  
19 care, hospitals, occupational health) as well as in other settings (education, sport,  
20 etc.). WHtR is the best predictor of MetS and its cut-off point can be used for both  
21 genders and for different age groups. The clinical decision tree that produces the  
22 NIM-MetS uses WHtR (0.56) and BP (128/80 mmHg), and obtains high specificity  
23 and diagnostic validity. The NIM-MetS provides a gradient or risk scale which allows  
24 a more accurate and earlier detection of CVD in subjects with risk of MetS.  
25  
26  
27  
28  
29  
30  
31  
32  
33  
34

### 35 **Contributor ship statement**

36  
37 Manuel Romero-Saldana contributed to the conception, design, acquisition and  
38 analysis/interpretation of data, drafted the manuscript, critically revised the  
39 manuscript and gave his final approval to the text, while also agreeing to be  
40 accountable for the integrity and accuracy of all aspects of the work.  
41  
42  
43

44 Pedro Tauler contributed to the data collection, analysis, critically revised the  
45 manuscript, gave his final approval, and agrees to be accountable for the integrity  
46 and accuracy of all aspects of the work.  
47  
48  
49

50 Manuel Vaquero-Abellán contributed to the analysis and interpretation, critically  
51 revised the manuscript, gave his final approval, and agrees to be accountable for  
52 the integrity and accuracy of all aspects of the work.  
53  
54  
55  
56  
57

1  
2  
3 Angel A. Lopez-Gonzalez contributed to the data collection, analysis, critically  
4 revised the manuscript, gave his final approval, and agrees to be accountable for  
5 the integrity and accuracy of all aspects of the work.  
6  
7

8 Francisco J. Fuentes-Jimenez contributed to the analysis, critically revised the  
9 manuscript, gave his final approval, and agrees to be accountable for the integrity  
10 and accuracy of all aspects of the work.  
11  
12

13 Antoni Aguilo contributed to the conception, critically revised the manuscript, gave  
14 his final approval, and agrees to be accountable for the integrity and accuracy of all  
15 aspects of the work.  
16  
17

18 Carlos Alvarez-Fernandez contributed to the conception, critically revised the  
19 manuscript, gave his final approval, and agrees to be accountable for the integrity  
20 and accuracy of all aspects of the work.  
21  
22

23 Guillermo Molina-Recio contributed to the analysis and interpretation, critically  
24 revised the manuscript, gave her final approval and agrees to be accountable for  
25 the integrity and accuracy of all aspects of the work.  
26  
27

28 Miquel Bennasar-Veny contributed to the design, acquisition and  
29 analysis/interpretation of data, critically revised the manuscript, gave his final  
30 approval, and agrees to be accountable for the integrity and accuracy of all aspects  
31 of the work.  
32  
33

### 34 **Competing interests**

35 None declared.  
36  
37  
38  
39  
40

### 41 **Funding**

42 This research received no specific grant from any funding agency in the public,  
43 commercial, or not-for-profit sectors.  
44  
45  
46

### 47 **Data sharing statement**

48 All data is fully available under request to the corresponding author.  
49  
50  
51  
52  
53

1  
2  
3  
4  
5  
6  
7  
8  
9  
10  
11  
12  
13  
14  
15  
16  
17  
18  
19  
20  
21  
22  
23  
24  
25  
26  
27  
28  
29  
30  
31  
32  
33  
34  
35  
36  
37  
38  
39  
40  
41  
42  
43  
44  
45  
46  
47  
48  
49  
50  
51  
52  
53  
54  
55  
56  
57  
58  
59  
60

For peer review only

**REFERENCES**

1. Swinburn BA, Sacks G, Hall KD, *et al.* The global obesity pandemic: shaped by global drivers and local environments. *Lancet* 2011;**378**:804-14.doi: 10.1016/S0140-6736(11)60813-1
2. Tauler P, Bennasar-Veny M, Morales-Asencio JM, *et al.* Prevalence of premorbid metabolic syndrome in Spanish adult workers using IDF and ATPIII diagnostic criteria: relationship with cardiovascular risk factors. *PLoS One* 2014;**9**:e89281.doi: 10.1371/journal.pone.0089281
3. Yamaoka K, Tango T. Effects of lifestyle modification on metabolic syndrome: a systematic review and meta-analysis. *BMC Med* 2012;**10**:138.doi: 10.1186/1741-7015-10-138
4. Guh DP, Zhang W, Bansback N, Amarsi Z, Birmingham CL, Anis AH. The incidence of co-morbidities related to obesity and overweight: a systematic review and meta-analysis. *BMC Pub Health* 2009;**9**:88.doi: 10.1186/1471-2458-9-88. PubMed PMID: 19320986
5. Schneider HJ, Klotsche J, Silber S, Stalla GK, Wittchen HU. Measuring abdominal obesity: effects of height on distribution of cardiometabolic risk factors risk using waist circumference and waist-to-height ratio. *Diab Care* 2011;**34**:e7.doi: 10.2337/dc10-1794
6. Zimmet PZ, Alberti KG, Shaw JE. Mainstreaming the metabolic syndrome: a definitive definition. *Med J Aust* 2005;**183**:175-6.
7. Bennasar-Veny M, Lopez-Gonzalez AA, Tauler P, *et al.* Body adiposity index and cardiovascular health risk factors in Caucasians: a comparison with the body mass index and others. *PLoS One* 2013;**8**:e63999. doi: 10.1371/journal.pone.0063999
8. Rosales M. Antropometría en el diagnóstico de pacientes obesos: una revisión. *Nutr Hosp* 2012;**27**:1803-9.

- 1  
2  
3 9. Despres JP, Prud'homme D, Pouliot MC, Tremblay A, Bouchard C. Estimation  
4 of deep abdominal adipose-tissue accumulation from simple anthropometric  
5 measurements in men. *Am J Clin Nutr* 1991;**54**:471-7.  
6  
7
- 8 10. Kodama S, Horikawa C, Fujihara K, et al. Comparisons of the strength of  
9 associations with future type 2 diabetes risk among anthropometric obesity  
10 indicators, including waist-to-height ratio: a meta-analysis. *Am J Epidemiol*  
11 2012;**176**:959-69. doi: 10.1093/aje/kws172  
12  
13
- 14 11. Petursson H, Sigurdsson JA, Bengtsson C, Nilsen TI, Getz L. Body  
15 configuration as a predictor of mortality: comparison of five anthropometric  
16 measures in a 12 year follow-up of the Norwegian HUNT 2 study. *PLoS One*  
17 2011;**6**:e26621. doi: 10.1371/journal.pone.0026621  
18  
19
- 20 12. Taylor AE, Ebrahim S, Ben-Shlomo Y, et al. Comparison of the associations  
21 of body mass index and measures of central adiposity and fat mass with coronary  
22 heart disease, diabetes, and all-cause mortality: a study using data from 4 UK  
23 cohorts. *Am J Clin Nutr* 2010;**91**:547-56. doi: 10.3945/ajcn.2009.28757. PubMed  
24 PMID: 20089729  
25  
26
- 27 13. Lam BC, Koh GC, Chen C, Wong MT, Fallows SJ. Comparison of Body Mass  
28 Index (BMI), Body Adiposity Index (BAI), Waist Circumference (WC), Waist-To-Hip  
29 Ratio (WHR) and Waist-To-Height Ratio (WHtR) as predictors of cardiovascular  
30 disease risk factors in an adult population in Singapore. *PLoS One*  
31 2015;**10**:e0122985. doi: 10.1371/journal.pone.0122985  
32  
33
- 34 14. Hsieh SD, Yoshinaga H. Waist/height ratio as a simple and useful predictor  
35 of coronary heart disease risk factors in women. *Intern Med* 1995;**34**:1147-52.  
36  
37
- 38 15. Romero-Saldana M, Fuentes-Jimenez FJ, Vaquero-Abellan M, Alvarez-  
39 Fernandez C, Molina-Recio G, Lopez-Miranda J. New non-invasive method for early  
40 detection of metabolic syndrome in the working population. *Eur J Cardiovasc Nurs*  
41 2016;**15**:549-558. doi: 10.1177/1474515115626622  
42  
43
- 44 16. Stewart A, Marfell-Jones M, Olds T, de Ridder H. *International standards for*  
45 *anthropometric assessment*. Lower Hutt, New Zealand: ISAK; 2011.  
46  
47  
48  
49  
50  
51  
52  
53  
54  
55  
56  
57

- 1  
2  
3 17. Braun S, Bitton-Worms K, LeRoith D. The link between the metabolic  
4 syndrome and cancer. *Int J Biol Sci* 2011;**7**:1003-15.
- 5  
6 18. Devers MC, Campbell S, Simmons D. Influence of age on the prevalence and  
7 components of the metabolic syndrome and the association with cardiovascular  
8 disease. *BMJ Open Diab Res Care* 2016;**4**:e000195. doi: 10.1136/bmjdr-2016-  
9 000195
- 10  
11 19. Ford ES, Li C, Sattar N. Metabolic syndrome and incident diabetes: current  
12 state of the evidence. *Diab Care* 2008;**31**:1898-904. doi: 10.2337/dc08-0423
- 13  
14 20. Gami AS, Witt BJ, Howard DE, et al. Metabolic syndrome and risk of incident  
15 cardiovascular events and death: a systematic review and meta-analysis of  
16 longitudinal studies. *J Am Coll Cardiol* 2007;**49**:403-14. doi:  
17 10.1016/j.jacc.2006.09.032
- 18  
19 21. Diamond GA. Clinical epistemology of sensitivity and specificity. *J Clin*  
20 *Epidemiol* 1992;**45**:9-13.
- 21  
22 22. Park J, Kim S. Validity of muscle-to-fat ratio as a predictor of adult metabolic  
23 syndrome. *J Phys Ther Sci* 2016;**28**:1036-45.
- 24  
25 23. Miller B, Fridline M, Liu PY, Marino D. Use of CHAID decision trees to  
26 formulate pathways for the early detection of metabolic syndrome in young adults.  
27 *Comput Math Methods Med* 2014;**2014**:242717. doi: 10.1155/2014/242717
- 28  
29 24. de Kroon ML, Renders CM, Kuipers EC, et al. Identifying metabolic syndrome  
30 without blood tests in young adults--the Terneuzen Birth Cohort. *Eur J Public Health*  
31 2008;**18**:656-60. doi: 10.1093/eurpub/ckn056
- 32  
33 25. Ashwell M, Hsieh SD. Six reasons why the waist-to-height ratio is a rapid  
34 and effective global indicator for health risks of obesity and how its use could  
35 simplify the international public health message on obesity. *Int J Food Sci Nutr*  
36 2005;**56**:303-7. doi: 10.1080/09637480500195066
- 37  
38 26. Bellido D, Lopez de la Torre M, Carreira J, et al. [Anthropometric measures  
39 of central abdominal fat and discriminant capacity for metabolic syndrome in a  
40  
41  
42  
43  
44  
45  
46  
47  
48  
49  
50  
51  
52  
53  
54  
55  
56  
57  
58  
59  
60

- 1  
2  
3 Spanish population]. *Clin Investig Arterioscler* 2013;**25**:105-9.doi:  
4 10.1016/j.arteri.2013.05.007  
5  
6 27. Browning LM, Hsieh SD, Ashwell M. A systematic review of waist-to-height  
7 ratio as a screening tool for the prediction of cardiovascular disease and diabetes:  
8 0.5 could be a suitable global boundary value. *Nutr Res Rev* 2010;**23**:247-69. doi:  
9 10.1017/S0954422410000144  
10  
11 28. Cristo Rodriguez Perez MD, Cabrera De Leon A, Aguirre-Jaime A, et al. [The  
12 waist to height ratio as an index of cardiovascular risk and diabetes]. *Med Clin*  
13 (*Barc*) 2010;**134**:386-91.doi: 10.1016/j.medcli.2009.09.047  
14  
15 29. Arnaiz P, Marin A, Pino F, et al. [Waist height ratio, ultrasensitive c reactive  
16 protein and metabolic syndrome in children]. *Rev Med Chil* 2010;**138**:1378-85.doi:  
17 /S0034-98872010001200006  
18  
19 30. Arnaiz P, Grob F, Cavada G, et al. [Waist-to-height ratio does not change  
20 with gender, age and pubertal stage in elementary school children]. *Rev Med Chil*  
21 2014;**142**:574-8.doi: 10.4067/S0034-98872014000500004  
22  
23 31. Koch E, Romero T, Manríquez L, Taylor A, Román C, Paredes M. Razón  
24 cintura-estatura: Un mejor predictor antropométrico de riesgo cardiovascular y  
25 mortalidad en adultos chilenos. Nomograma diagnóstico utilizado en el Proyecto  
26 San Francisco. *Rev Chil de Cardiol* 2008;**27**:23-35.  
27  
28 32. Obeidat AA, Ahmad MN, Haddad FH, Azzeh FS. Evaluation of Several  
29 Anthropometric Indices of Obesity as Predictors of Metabolic Syndrome in Jordanian  
30 Adults. *Nutr Hosp* 2015;**32**:667-77.doi: 10.3305/nh.2015.32.2.9063  
31  
32 33. Rajput R, Rajput M, Bairwa M, Singh J, Saini O, Shankar V. Waist height  
33 ratio: A universal screening tool for prediction of metabolic syndrome in urban and  
34 rural population of Haryana. *Indian J Endocrinol Metab* 2014;**18**:394-9. doi:  
35 10.4103/2230-8210.131201  
36  
37 34. He YH, Chen YC, Jiang GX, et al. Evaluation of anthropometric indices for  
38 metabolic syndrome in Chinese adults aged 40 years and over. *Eur J Nutr*  
39 2012;**51**:81-7.doi: 10.1007/s00394-011-0195-2  
40  
41  
42  
43  
44  
45  
46  
47  
48  
49  
50  
51  
52  
53  
54  
55  
56  
57  
58  
59  
60



- 1  
2  
3 35. Ashwell M, Gunn P, Gibson S. Waist-to-height ratio is a better screening tool  
4 than waist circumference and BMI for adult cardiometabolic risk factors: systematic  
5 review and meta-analysis. *Obes Rev* 2012;**13**:275-86.doi: 10.1111/j.1467-  
6 789X.2011.00952.x  
7  
8  
9  
10 36. Savva SC, Lamniso D, Kafatos AG. Predicting cardiometabolic risk: waist-  
11 to-height ratio or BMI. A meta-analysis. *Diab Metab Syndr Obes* 2013;**6**:403-19.  
12 doi: 10.2147/DMSO.S34220  
13  
14 37. Mark D, De Boer MD, Gurka MJ, Woo JG, Morrison JA. Severity of the  
15 metabolic syndrome as a predictor of type 2 diabetes between childhood and  
16 adulthood: the Princeton Lipid Research Cohort Study. *Diabetologia* 2015;**58**:2745-  
17 52.  
18  
19 38. Wiley JF, Carrington MJ. A metabolic syndrome severity score: A tool to  
20 quantify cardio-metabolic risk factors. *Prev Med* 2016;**88**:189-95.doi:  
21 10.1016/j.ypped.2016.04.006  
22  
23  
24  
25  
26  
27  
28  
29  
30  
31  
32  
33  
34  
35  
36  
37  
38  
39  
40  
41  
42  
43  
44  
45  
46  
47  
48  
49  
50  
51  
52  
53  
54  
55  
56  
57  
58  
59  
60

**Table 1. Characteristics of the sample according to gender**

| Variable                          | Total<br>n=60,799      | Men<br>n= 34,827       | Women<br>n= 25,972     | p      |
|-----------------------------------|------------------------|------------------------|------------------------|--------|
|                                   | Mean (95% CI) or n (%) | Mean (95% CI) or n (%) | Mean (95% CI) or n (%) |        |
| <b>Age</b> (years)                | 40 (39.9 – 40.1)       | 40.4 (40.3 – 40.5)     | 39.5 (39.3 – 39.6)     | <0.001 |
| <b>Smoker</b> (yes)               | 21,177 (34.8%)         | 12,746 (36.6%)         | 8,431 (32.5%)          | <0.001 |
| <b>BMI</b> (kg/m <sup>2</sup> )   | 26.1 (26 – 26.1)       | 26.9 (26.8 – 26.9)     | 25.0 (25 – 25.1)       | <0.001 |
| <b>WC</b> (cm)                    | 82.9 (82.9 – 83)       | 88.6 (88.5 – 88.7)     | 75.4 (75.3 – 75.5)     | <0.001 |
| <b>WHR</b>                        | 0.49 (0.49 – 0.49)     | 0.51 (0.50 – 0.51)     | 0.47 (0.46 – 0.47)     | <0.001 |
| <b>ABSI</b>                       | 0.0735 (0.07 – 0.07)   | 0.0735 (0.07 – 0.07)   | 0.07 (0.07 – 0.07)     | <0.001 |
| <b>BF</b> (%)                     | 28.9 (28.9 – 29)       | 25.3 (25.3 – 25.4)     | 33.7 (33.6 – 37.8)     | <0.001 |
| <b>SBP</b> (mmHg)                 | 120.8 (120.6 – 120.9)  | 125.4 (125.2 – 125.6)  | 114.6 (114.4 – 114.8)  | <0.001 |
| <b>DBP</b> (mmHg)                 | 73.6 (73.5 – 73.7)     | 76.0 (75.9 – 76.1)     | 70.4 (70.3 – 70.5)     | <0.001 |
| <b>Glucose</b> (mg/dL)            | 88.3 (88.1 – 88.5)     | 90.6 (90.4 – 90.8)     | 85.2 (85 – 85.4)       | <0.001 |
| <b>Cholesterol</b> (mg/dL)        | 195.2 (194.9 – 195.5)  | 196.9 (196.5 – 197.3)  | 193.0 (192.6 – 193.4)  | <0.001 |
| <b>HDL-Cholesterol</b><br>(mg/dL) | 52.4 (52.3 – 52.5)     | 50.5 (50.4 – 50.6)     | 55.0 (54.9 – 55.1)     | <0.001 |
| <b>LDL-Cholesterol</b><br>(mg/dL) | 121.2 (120.9 – 121.5)  | 121.8 (121.4 – 126.2)  | 120.5 (120 – 120.9)    | <0.001 |
| <b>Triglycerides</b><br>(mg/dL)   | 109.3 (108.7 – 109.9)  | 125.3 (124.4 – 126.2)  | 88.8 (88.2 – 89.4)     | <0.001 |
| <b>MetS</b> (yes)                 | 5,587 (9.0%)           | 4,097 (11.8%)          | 1,390 (5.4%)           | <0.001 |

BMI: Body Mass Index; WC: Waist circumference; WHtR: Waist to Height Ratio; ABSI: A body Shape Index; BF (%): Body Fat percentage calculated according to the Deurenberg equation; SBP: Systolic Blood Pressure; DBP: Diastolic Blood Pressure; MetS: Metabolic syndrome. P<0.05 indicates significant differences between genders

**Table 2. Diagnostic test accuracy of NIM-MetS against NCEP-ATP III  
STANDARD REFERENCE NCEP APTIII**

|                                    |              | TOTAL              |        |        | MEN                |        |        | WOMEN              |        |        |
|------------------------------------|--------------|--------------------|--------|--------|--------------------|--------|--------|--------------------|--------|--------|
|                                    |              | Yes                | No     | Total  | Yes                | No     | Total  | Yes                | No     | Total  |
| <b>NIM – MetS</b><br>(n)           | <b>Yes</b>   | 3,001              | 2,850  | 5,851  | 2,433              | 2,300  | 4,733  | 568                | 550    | 1,118  |
|                                    | <b>No</b>    | 2,486              | 52,462 | 54,948 | 1,664              | 28,430 | 30,094 | 822                | 24,032 | 24,854 |
|                                    | <b>Total</b> | 5,487              | 55,312 | 60,799 | 4,097              | 30,730 | 34,827 | 1,390              | 24,582 | 25,972 |
| <b>Efficacy indicators, 95% CI</b> |              |                    |        |        |                    |        |        |                    |        |        |
| <b>Sensitivity</b>                 |              | 54.7 (53.4 – 56)   |        |        | 59.4 (57.9 – 60.9) |        |        | 40.9 (38.2 – 43.5) |        |        |
| <b>Specificity</b>                 |              | 94.9 (94.7 – 95)   |        |        | 92.5 (92.2 – 92.8) |        |        | 97.8 (97.6 – 98)   |        |        |
| <b>PPV</b>                         |              | 51.3 (50 – 52.6)   |        |        | 51.4 (50 – 52.8)   |        |        | 50.8 (47.8 – 53.8) |        |        |
| <b>NPV</b>                         |              | 95.5 (95 – 95.7)   |        |        | 94.5 (94.2 – 94.7) |        |        | 96.7 (96.5 – 96.9) |        |        |
| <b>VI</b>                          |              | 91.2 (91 – 91.5)   |        |        | 88.6 (88.3 – 89)   |        |        | 94.7 (94.4 – 95)   |        |        |
| <b>LH +</b>                        |              | 10.6 (10.2 – 11.1) |        |        | 7.9 (7.6 – 8.3)    |        |        | 18.3 (16.5 – 20.3) |        |        |
| <b>LH -</b>                        |              | 0.48 (0.46 – 0.49) |        |        | 0.44 (0.42 – 0.46) |        |        | 0.6 (0.58 – 0.63)  |        |        |
| <b>JI</b>                          |              | 0.50 (0.48 – 0.51) |        |        | 0.52 (0.5 – 0.53)  |        |        | 0.39 (0.36 – 0.41) |        |        |

PPV: Positive Predictive Value; NPV: Negative Predictive Value; VI: Validity Index; LH +: Likelihood ratio positive; LH -: Likelihood ratio negative; JI: Youden Index.

**Table 3. Area under the curve (AUC) and cut-off values for WHtR according to gender and age groups**

| Age group (years) | n      | Prevalence of MetS (%) <sup>a</sup> | AUC 95% CI         | Cut-off value | Sensitivity (%) | Specificity (%) | JI   |
|-------------------|--------|-------------------------------------|--------------------|---------------|-----------------|-----------------|------|
| <b>MEN</b>        |        |                                     |                    |               |                 |                 |      |
| <b>20-30</b>      | 6,825  | 3.1                                 | 0.92 (0.9 – 0.95)  | 0.55          | 80.3            | 93.4            | 0.74 |
| <b>31-40</b>      | 11,623 | 7.5                                 | 0.88 (0.86 – 0.89) | 0.55          | 77.4            | 88.1            | 0.65 |
| <b>41-50</b>      | 10,080 | 14.9                                | 0.82 (0.81 – 0.83) | 0.56          | 66.4            | 87.7            | 0.54 |
| <b>≥51</b>        | 6,659  | 23.1                                | 0.75 (0.74 – 0.77) | 0.56          | 58.9            | 83.0            | 0.42 |
| <b>Total</b>      | 34,827 | 11.8                                | 0.84 (0.83 – 0.85) | 0.56          | 66.7            | 88.8            | 0.56 |
| <b>WOMEN</b>      |        |                                     |                    |               |                 |                 |      |
| <b>20-30</b>      | 5,715  | 1.1                                 | 0.90 (0.85 – 0.95) | 0.51          | 82.0            | 84.0            | 0.74 |
| <b>31-40</b>      | 8,529  | 2.7                                 | 0.91 (0.89 – 0.93) | 0.53          | 80.3            | 90.8            | 0.71 |
| <b>41-50</b>      | 7,641  | 6.6                                 | 0.91 (0.89 – 0.93) | 0.53          | 80.3            | 90.8            | 0.71 |
| <b>≥51</b>        | 4,087  | 14.4                                | 0.75 (0.73 – 0.77) | 0.55          | 48.4            | 90.5            | 0.39 |
| <b>Total</b>      | 25,972 | 5.4                                 | 0.85 (0.84 – 0.86) | 0.53          | 65.1            | 88.7            | 0.54 |
| <b>TOTAL</b>      |        |                                     |                    |               |                 |                 |      |
| <b>20-30</b>      | 12,540 | 2.1                                 | 0.92 (0.9 – 0.94)  | 0.53          | 84.4            | 90.1            | 0.75 |
| <b>31-40</b>      | 19,792 | 5.5                                 | 0.90 (0.89 – 0.91) | 0.54          | 78.2            | 88.5            | 0.67 |
| <b>41-50</b>      | 17,721 | 11.3                                | 0.83 (0.82 – 0.84) | 0.54          | 69.6            | 84.3            | 0.54 |
| <b>≥51</b>        | 10,746 | 19.8                                | 0.76 (0.75 – 0.77) | 0.56          | 57.0            | 85.3            | 0.42 |
| <b>Total</b>      | 60,799 | 9.0                                 | 0.85 (0.84 – 0.86) | 0.54          | 68.5            | 87.0            | 0.56 |

a: MetS according to NCEP ATP III criterion; AUC: area under the curve; JI: Youden Index

**Table 4. Probabilities of MetS (%) for nodes 3, 4, 5 and 6 in decision trees according to cut-off values of WtHR**

| WHtR range               | BP model        | Probabilities of MetS for nodes in the decision tree |        |        |        | Efficacy indicators for diagnostic test accuracy |                 |        |      |
|--------------------------|-----------------|------------------------------------------------------|--------|--------|--------|--------------------------------------------------|-----------------|--------|------|
|                          |                 | Node 3                                               | Node 4 | Node 5 | Node 6 | Sensitivity (%)                                  | Specificity (%) | VI (%) | JI   |
| <b>0.535</b>             | BP <sup>1</sup> | 0.3                                                  | 7.4    | 10.3   | 38.4   | 63.9                                             | 89.7            | 87.5   | 0.54 |
|                          | BP <sup>2</sup> | 0.5                                                  | 10.4   | 12.2   | 43.3   | 59.3                                             | 92.3            | 89.3   | 0.52 |
|                          | SBP             | 0.6                                                  | 10.5   | 13.7   | 43.3   | 57.0                                             | 92.6            | 89.4   | 0.5  |
| <b>0.54</b>              | BP <sup>1</sup> | 0.3                                                  | 7.6    | 11.5   | 40.7   | 62.7                                             | 90.9            | 88.4   | 0.54 |
|                          | BP <sup>2</sup> | 0.5                                                  | 10.5   | 13.5   | 45.7   | 57.8                                             | 93.2            | 90.0   | 0.51 |
|                          | SBP             | 0.6                                                  | 10.7   | 15.2   | 45.7   | 55.6                                             | 93.5            | 90.0   | 0.49 |
| <b>0.544<sup>a</sup></b> | BP <sup>1</sup> | 0.4                                                  | 7.7    | 12.5   | 42.8   | 61.6                                             | 91.8            | 89.1   | 0.53 |
|                          | BP <sup>2</sup> | 0.5                                                  | 10.9   | 14.6   | 48.0   | 56.7                                             | 93.9            | 90.5   | 0.51 |
|                          | SBP             | 0.6                                                  | 10.8   | 16.4   | 48.0   | 54.5                                             | 94.1            | 90.6   | 0.49 |
| <b>0.550<sup>b</sup></b> | BP <sup>1</sup> | 0.4                                                  | 7.9    | 14.2   | 46.1   | 59.6                                             | 93.1            | 90.1   | 0.53 |
|                          | BP <sup>2</sup> | 0.5                                                  | 10.9   | 16.6   | 51.3   | 54.7                                             | 94.8            | 91.2   | 0.46 |
|                          | SBP             | 0.7                                                  | 11.0   | 18.5   | 51.4   | 52.6                                             | 95.1            | 91.2   | 0.48 |
| <b>0.555</b>             | BP <sup>1</sup> | 0.4                                                  | 8.2    | 15.7   | 49.1   | 57.8                                             | 94.1            | 90.8   | 0.52 |
|                          | BP <sup>2</sup> | 0.6                                                  | 11.1   | 18.3   | 54.4   | 53.0                                             | 95.6            | 91.7   | 0.49 |
|                          | SBP             | 0.7                                                  | 11.3   | 20.3   | 54.5   | 51.0                                             | 95.8            | 91.7   | 0.47 |
| <b>0.560</b>             | BP <sup>1</sup> | 0.5                                                  | 8.5    | 17.0   | 51.8   | 55.7                                             | 94.9            | 91.3   | 0.51 |
|                          | BP <sup>2</sup> | 0.6                                                  | 11.5   | 19.9   | 57.1   | 51.0                                             | 96.2            | 92.1   | 0.47 |
|                          | SBP             | 0.8                                                  | 11.6   | 21.9   | 57.2   | 49.1                                             | 96.4            | 92.1   | 0.46 |
| <b>0.565</b>             | BP <sup>1</sup> | 0.5                                                  | 8.8    | 18.6   | 54.9   | 53.4                                             | 95.6            | 91.8   | 0.49 |
|                          | BP <sup>2</sup> | 0.6                                                  | 11.9   | 21.8   | 60.3   | 48.8                                             | 96.8            | 92.5   | 0.46 |
|                          | SBP             | 0.8                                                  | 12.0   | 23.9   | 60.4   | 47.0                                             | 96.9            | 92.4   | 0.44 |
| <b>0.570</b>             | BP <sup>1</sup> | 0.5                                                  | 9.1    | 19.9   | 57.4   | 51.4                                             | 96.2            | 92.2   | 0.48 |
|                          | BP <sup>2</sup> | 0.7                                                  | 12.3   | 23.3   | 62.8   | 46.9                                             | 97.2            | 92.7   | 0.44 |
|                          | SBP             | 0.9                                                  | 12.4   | 25.5   | 63.0   | 45.2                                             | 97.4            | 92.7   | 0.43 |

BP: Blood Pressure; BP<sup>1</sup>: Blood pressure ≥128/80 mmHg; BP<sup>2</sup>: Blood pressure ≥128/85 mmHg; SBP: Systolic blood pressure ≥128 mmHg; VI: Validity index; JI: Youden Index; a: Cut-off point for WHtR obtained in the total simple (n=60,799); b: Cut-off point proposed by NIM-MetS

1  
2  
3  
4  
5  
6  
7  
8  
9  
10  
11  
12  
13  
14  
15  
16  
17  
18  
19  
20  
21  
22  
23  
24  
25  
26  
27  
28  
29  
30  
31  
32  
33  
34  
35  
36  
37  
38  
39  
40  
41  
42  
43  
44  
45  
46  
47  
48  
49  
50  
51  
52  
53  
54  
55  
56  
57  
58  
59  
60

For peer review only

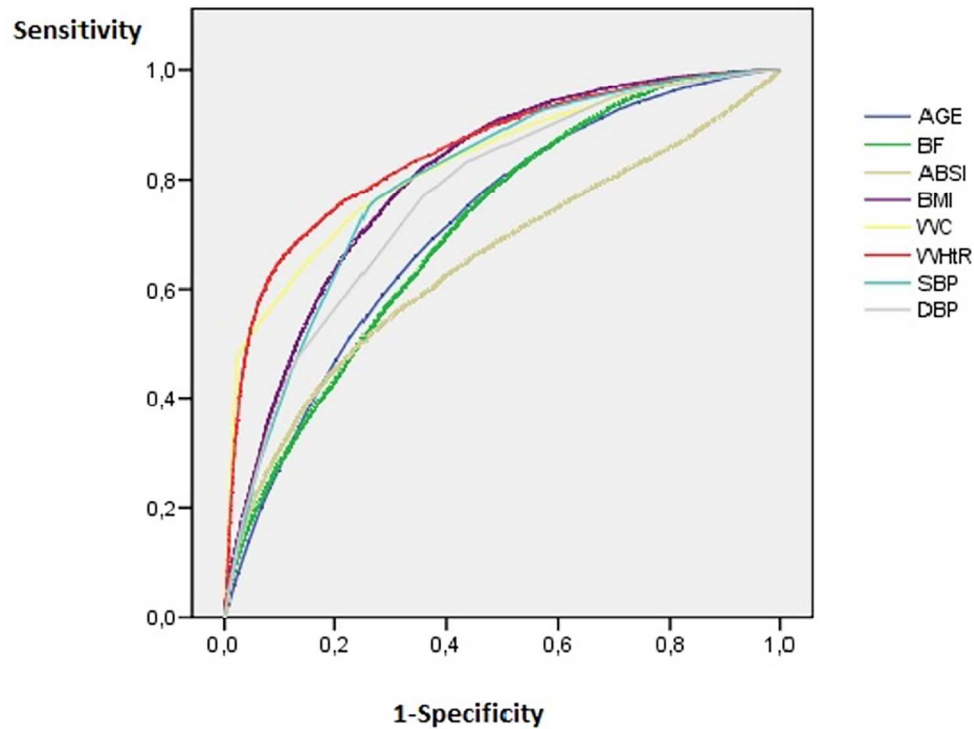

|             | AUC (95% CI)       | CP    | Sensitivity (%) | Specificity (%) | JI   |
|-------------|--------------------|-------|-----------------|-----------------|------|
| <b>Age</b>  | 0.71 (0.71 - 0.72) | 42.5  | 69.2            | 62.5            | 0.32 |
| <b>WHtR</b> | 0.85 (0.84 - 0.86) | 0.54  | 68.5            | 87.0            | 0.56 |
| <b>WC</b>   | 0.83 (0.82 - 0.84) | 89.1  | 72.5            | 77.6            | 0.50 |
| <b>BMI</b>  | 0.8 (0.8 - 0.81)   | 27.1  | 78.4            | 68.3            | 0.47 |
| <b>ABSI</b> | 0.65 (0.64 - 0.66) | 0.07  | 50.4            | 75.2            | 0.26 |
| <b>BF%</b>  | 0.71 (0.7 - 0.72)  | 29.4  | 70.9            | 58.1            | 0.3  |
| <b>SBP</b>  | 0.79 (0.79 - 0.8)  | 127.5 | 75.8            | 73.5            | 0.49 |
| <b>DBP</b>  | 0.77 (0.76 - 0.78) | 78.5  | 77.3            | 63.9            | 0.41 |

AUC: Area under curve CP: Cut-off point; JI: Youden Index; BMI: Body mass index; WC: Waist circumference; WHtR: Waist to height ratio; ABSI: A Body Shape Index; BF (%): Body Fat calculated according to the Deurenberg equation; SBP: Systolic Blood Pressure; DBP: Diastolic Blood Pressure.

Figure 1

403x470mm (72 x 72 DPI)

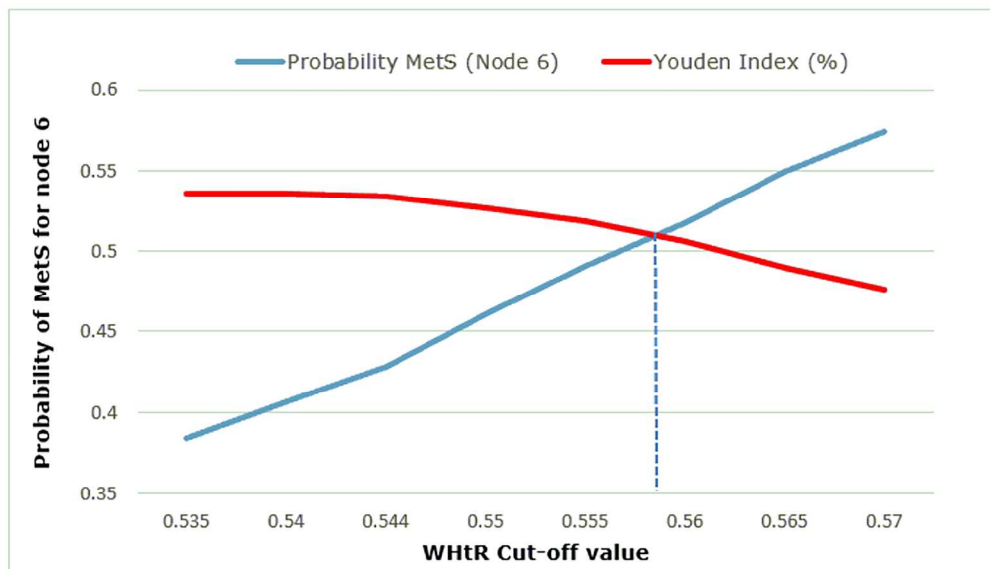

Figure 2

170x98mm (300 x 300 DPI)

Review only



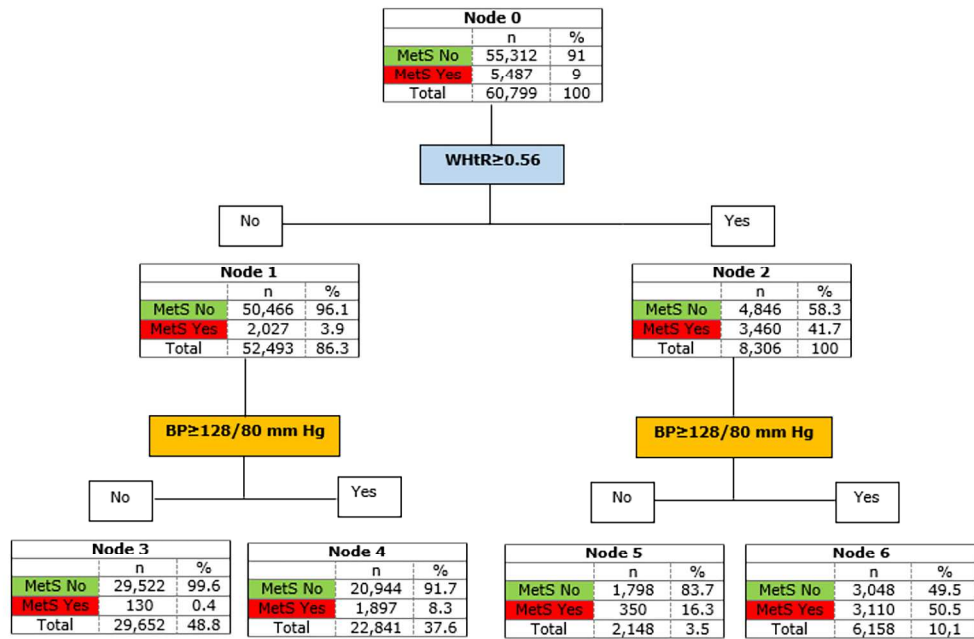

Figure 3

274x183mm (300 x 300 DPI)

STROBE Statement—Checklist of items that should be included in reports of *cross-sectional studies*

|                              | Item No | Recommendation                                                                                                                                                                                    | Checked in page |
|------------------------------|---------|---------------------------------------------------------------------------------------------------------------------------------------------------------------------------------------------------|-----------------|
| <b>Title and abstract</b>    | 1       | (a) Indicate the study's design with a commonly used term in the title or the abstract                                                                                                            | 2               |
|                              |         | (b) Provide in the abstract an informative and balanced summary of what was done and what was found                                                                                               | 2               |
| <b>Introduction</b>          |         |                                                                                                                                                                                                   |                 |
| Background/rationale         | 2       | Explain the scientific background and rationale for the investigation being reported                                                                                                              | 4               |
| Objectives                   | 3       | State specific objectives, including any prespecified hypotheses                                                                                                                                  | 5               |
| <b>Methods</b>               |         |                                                                                                                                                                                                   |                 |
| Study design                 | 4       | Present key elements of study design early in the paper                                                                                                                                           | 6               |
| Setting                      | 5       | Describe the setting, locations, and relevant dates, including periods of recruitment, exposure, follow-up, and data collection                                                                   | 6               |
| Participants                 | 6       | (a) Give the eligibility criteria, and the sources and methods of selection of participants                                                                                                       | 6-7-8           |
| Variables                    | 7       | Clearly define all outcomes, exposures, predictors, potential confounders, and effect modifiers. Give diagnostic criteria, if applicable                                                          | 7-8             |
| Data sources/<br>measurement | 8*      | For each variable of interest, give sources of data and details of methods of assessment (measurement). Describe comparability of assessment methods if there is more than one group              | 7               |
| Bias                         | 9       | Describe any efforts to address potential sources of bias                                                                                                                                         | 7-8             |
| Study size                   | 10      | Explain how the study size was arrived at                                                                                                                                                         | 6               |
| Quantitative<br>variables    | 11      | Explain how quantitative variables were handled in the analyses. If applicable, describe which groupings were chosen and why                                                                      | 6-7-8           |
| Statistical methods          | 12      | (a) Describe all statistical methods, including those used to control for confounding                                                                                                             | 9               |
|                              |         | (b) Describe any methods used to examine subgroups and interactions                                                                                                                               | 9               |
|                              |         | (c) Explain how missing data were addressed                                                                                                                                                       |                 |
|                              |         | (d) If applicable, describe analytical methods taking account of sampling strategy                                                                                                                | 9               |
|                              |         | (e) Describe any sensitivity analyses                                                                                                                                                             | 9               |
| <b>Results</b>               |         |                                                                                                                                                                                                   |                 |
| Participants                 | 13*     | (a) Report numbers of individuals at each stage of study—eg numbers potentially eligible, examined for eligibility, confirmed eligible, included in the study, completing follow-up, and analysed | 11              |
|                              |         | (b) Give reasons for non-participation at each stage                                                                                                                                              | 11              |
|                              |         | (c) Consider use of a flow diagram                                                                                                                                                                | Not necessary   |
| Descriptive data             | 14*     | (a) Give characteristics of study participants (eg demographic, clinical, social) and information on exposures and potential confounders                                                          | 11-12           |
|                              |         | (b) Indicate number of participants with missing data for each variable of interest                                                                                                               | none            |
| Outcome data                 | 15*     | Report numbers of outcome events or summary measures                                                                                                                                              | 11-12-13        |
| Main results                 | 16      | (a) Give unadjusted estimates and, if applicable, confounder-adjusted                                                                                                                             | 12-13-14        |

|                          |    |                                                                                                                                                                            |               |
|--------------------------|----|----------------------------------------------------------------------------------------------------------------------------------------------------------------------------|---------------|
|                          |    | estimates and their precision (eg, 95% confidence interval). Make clear which confounders were adjusted for and why they were included                                     |               |
|                          |    | (b) Report category boundaries when continuous variables were categorized                                                                                                  | 13-14         |
|                          |    | (c) If relevant, consider translating estimates of relative risk into absolute risk for a meaningful time period                                                           | Not indicated |
| Other analyses           | 17 | Report other analyses done—eg analyses of subgroups and interactions, and sensitivity analyses                                                                             | 11-14         |
| <b>Discussion</b>        |    |                                                                                                                                                                            |               |
| Key results              | 18 | Summarise key results with reference to study objectives                                                                                                                   | 16-17-18      |
| Limitations              | 19 | Discuss limitations of the study, taking into account sources of potential bias or imprecision. Discuss both direction and magnitude of any potential bias                 | 18            |
| Interpretation           | 20 | Give a cautious overall interpretation of results considering objectives, limitations, multiplicity of analyses, results from similar studies, and other relevant evidence | 16-17         |
| Generalisability         | 21 | Discuss the generalisability (external validity) of the study results                                                                                                      | 17-18         |
| <b>Other information</b> |    |                                                                                                                                                                            |               |
| Funding                  | 22 | Give the source of funding and the role of the funders for the present study and, if applicable, for the original study on which the present article is based              | 20            |

\*Give information separately for exposed and unexposed groups.

**Note:** An Explanation and Elaboration article discusses each checklist item and gives methodological background and published examples of transparent reporting. The STROBE checklist is best used in conjunction with this article (freely available on the Web sites of PLoS Medicine at <http://www.plosmedicine.org/>, Annals of Internal Medicine at <http://www.annals.org/>, and Epidemiology at <http://www.epidem.com/>). Information on the STROBE Initiative is available at [www.strobe-statement.org](http://www.strobe-statement.org).

| Section & Topic          | No  | Item                                                                                                                                                   | Checked in page |
|--------------------------|-----|--------------------------------------------------------------------------------------------------------------------------------------------------------|-----------------|
| <b>TITLE OR ABSTRACT</b> |     |                                                                                                                                                        |                 |
|                          | 1   | Identification as a study of diagnostic accuracy using at least one measure of accuracy (such as sensitivity, specificity, predictive values, or AUC)  | 2               |
| <b>ABSTRACT</b>          |     |                                                                                                                                                        |                 |
|                          | 2   | Structured summary of study design, methods, results, and conclusions (for specific guidance, see STARD for Abstracts)                                 | 2               |
| <b>INTRODUCTION</b>      |     |                                                                                                                                                        |                 |
|                          | 3   | Scientific and clinical background, including the intended use and clinical role of the index test                                                     | 4               |
|                          | 4   | Study objectives and hypotheses                                                                                                                        | 4-5             |
| <b>METHODS</b>           |     |                                                                                                                                                        |                 |
| <i>Study design</i>      | 5   | Whether data collection was planned before the index test and reference standard were performed (prospective study) or after (retrospective study)     | 6               |
| <i>Participants</i>      | 6   | Eligibility criteria                                                                                                                                   | 6               |
|                          | 7   | On what basis potentially eligible participants were identified (such as symptoms, results from previous tests, inclusion in registry)                 | 6               |
|                          | 8   | Where and when potentially eligible participants were identified (setting, location and dates)                                                         | 6               |
|                          | 9   | Whether participants formed a consecutive, random or convenience series                                                                                | 6               |
| <i>Test methods</i>      | 10a | Index test, in sufficient detail to allow replication                                                                                                  | 7               |
|                          | 10b | Reference standard, in sufficient detail to allow replication                                                                                          | 7               |
|                          | 11  | Rationale for choosing the reference standard (if alternatives exist)                                                                                  |                 |
|                          | 12a | Definition of and rationale for test positivity cut-offs or result categories of the index test, distinguishing pre-specified from exploratory         | 8               |
|                          | 12b | Definition of and rationale for test positivity cut-offs or result categories of the reference standard, distinguishing pre-specified from exploratory | 8               |
|                          | 13a | Whether clinical information and reference standard results were available to the performers/readers of the index test                                 | 8-9             |
|                          | 13b | Whether clinical information and index test results were available to the assessors of the reference standard                                          | 8-9             |
| <i>Analysis</i>          | 14  | Methods for estimating or comparing measures of diagnostic accuracy                                                                                    | 9-10            |
|                          | 15  | How indeterminate index test or reference standard results were handled                                                                                | 9-10            |
|                          | 16  | How missing data on the index test and reference standard were handled                                                                                 | 9-10            |
|                          | 17  | Any analyses of variability in diagnostic accuracy, distinguishing pre-specified from exploratory                                                      |                 |
|                          | 18  | Intended sample size and how it was determined                                                                                                         | 6               |
| <b>RESULTS</b>           |     |                                                                                                                                                        |                 |
| <i>Participants</i>      | 19  | Flow of participants, using a diagram                                                                                                                  | Not indicated   |
|                          | 20  | Baseline demographic and clinical characteristics of participants                                                                                      | 11              |
|                          | 21a | Distribution of severity of disease in those with the target condition                                                                                 | 11-12           |
|                          | 21b | Distribution of alternative diagnoses in those without the target condition                                                                            | 11-12           |
|                          | 22  | Time interval and any clinical interventions between index test and reference standard                                                                 | Not necessary   |
| <i>Test results</i>      | 23  | Cross tabulation of the index test results (or their distribution) by the results of the reference standard                                            | 12              |
|                          | 24  | Estimates of diagnostic accuracy and their precision (such as 95% confidence intervals)                                                                | 12              |
|                          | 25  | Any adverse events from performing the index test or the reference standard                                                                            | None            |
| <b>DISCUSSION</b>        |     |                                                                                                                                                        |                 |
|                          | 26  | Study limitations, including sources of potential bias, statistical uncertainty, and generalisability                                                  | 17-18           |
|                          | 27  | Implications for practice, including the intended use and clinical role of the index test                                                              | 17-18-19        |
| <b>OTHER INFORMATION</b> |     |                                                                                                                                                        |                 |
|                          | 28  | Registration number and name of registry                                                                                                               |                 |
|                          | 29  | Where the full study protocol can be accessed                                                                                                          |                 |
|                          | 30  | Sources of funding and other support; role of funders                                                                                                  | 20              |

# STARD 2015

---

## AIM

STARD stands for “Standards for Reporting Diagnostic accuracy studies”. This list of items was developed to contribute to the completeness and transparency of reporting of diagnostic accuracy studies. Authors can use the list to write informative study reports. Editors and peer-reviewers can use it to evaluate whether the information has been included in manuscripts submitted for publication.

---

## EXPLANATION

A **diagnostic accuracy study** evaluates the ability of one or more medical tests to correctly classify study participants as having a **target condition**. This can be a disease, a disease stage, response or benefit from therapy, or an event or condition in the future. A medical test can be an imaging procedure, a laboratory test, elements from history and physical examination, a combination of these, or any other method for collecting information about the current health status of a patient.

The test whose accuracy is evaluated is called **index test**. A study can evaluate the accuracy of one or more index tests. Evaluating the ability of a medical test to correctly classify patients is typically done by comparing the distribution of the index test results with those of the **reference standard**. The reference standard is the best available method for establishing the presence or absence of the target condition. An accuracy study can rely on one or more reference standards.

If test results are categorized as either positive or negative, the cross tabulation of the index test results against those of the reference standard can be used to estimate the **sensitivity** of the index test (the proportion of participants *with* the target condition who have a positive index test), and its **specificity** (the proportion *without* the target condition who have a negative index test). From this cross tabulation (sometimes referred to as the contingency or “2x2” table), several other accuracy statistics can be estimated, such as the positive and negative **predictive values** of the test. Confidence intervals around estimates of accuracy can then be calculated to quantify the statistical **precision** of the measurements.

If the index test results can take more than two values, categorization of test results as positive or negative requires a **test positivity cut-off**. When multiple such cut-offs can be defined, authors can report a receiver operating characteristic (ROC) curve which graphically represents the combination of sensitivity and specificity for each possible test positivity cut-off. The **area under the ROC curve** informs in a single numerical value about the overall diagnostic accuracy of the index test.

The **intended use** of a medical test can be diagnosis, screening, staging, monitoring, surveillance, prediction or prognosis. The **clinical role** of a test explains its position relative to existing tests in the clinical pathway. A replacement test, for example, replaces an existing test. A triage test is used before an existing test; an add-on test is used after an existing test.

Besides diagnostic accuracy, several other outcomes and statistics may be relevant in the evaluation of medical tests. Medical tests can also be used to classify patients for purposes other than diagnosis, such as staging or prognosis. The STARD list was not explicitly developed for these other outcomes, statistics, and study types, although most STARD items would still apply.

---

## DEVELOPMENT

This STARD list was released in 2015. The 30 items were identified by an international expert group of methodologists, researchers, and editors. The guiding principle in the development of STARD was to select items that, when reported, would help readers to judge the potential for bias in the study, to appraise the applicability of the study findings and the validity of conclusions and recommendations. The list represents an update of the first version, which was published in 2003.

More information can be found on <http://www.equator-network.org/reporting-guidelines/stard>.

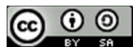

# BMJ Open

## Validation of a non-invasive method for the early detection of metabolic syndrome: a diagnostic accuracy test in a working population

|                                 |                                                                                                                                                                                                                                                                                                                                                                                                                                                                                                                                                                                                                                                                                                                                                                                                                                                                                               |
|---------------------------------|-----------------------------------------------------------------------------------------------------------------------------------------------------------------------------------------------------------------------------------------------------------------------------------------------------------------------------------------------------------------------------------------------------------------------------------------------------------------------------------------------------------------------------------------------------------------------------------------------------------------------------------------------------------------------------------------------------------------------------------------------------------------------------------------------------------------------------------------------------------------------------------------------|
| Journal:                        | <i>BMJ Open</i>                                                                                                                                                                                                                                                                                                                                                                                                                                                                                                                                                                                                                                                                                                                                                                                                                                                                               |
| Manuscript ID                   | bmjopen-2017-020476.R2                                                                                                                                                                                                                                                                                                                                                                                                                                                                                                                                                                                                                                                                                                                                                                                                                                                                        |
| Article Type:                   | Research                                                                                                                                                                                                                                                                                                                                                                                                                                                                                                                                                                                                                                                                                                                                                                                                                                                                                      |
| Date Submitted by the Author:   | 30-Aug-2018                                                                                                                                                                                                                                                                                                                                                                                                                                                                                                                                                                                                                                                                                                                                                                                                                                                                                   |
| Complete List of Authors:       | ROMERO-SALDAÑA, MANUEL; Safety and Occupational Health Tauler, Pedro; Univ Balearic Isl, Fundamental Biology and Health Sciences Vaquero-Abellán, Manuel; University of Córdoba, Department of Occupational Risk Prevention and Environmental Protection López-González, Angel-Arturo; Balearic Islands Health Service, Prevention of Occupational Risks in Health Services Fuentes-Jiménez, Francisco-José; Instituto Maimonides de Investigacion Biomedica de Cordoba, Unid of Lipids Aguiló, Antoni; University of the Balearic Islands, Research Group on Evidence, Lifestyles & Health Álvarez-Fernández, Carlos; City Hall, Córdoba, Department of Occupational Safety and Health Molina-Recio, Guillermo; Univeristy of Córdoba, Department of Nursing, School of Medicine and Nursing Bannasar-Veny, Miquel; University of the Balearic Islands, Nursing and Physiotherapy Department |
| <b>Primary Subject Heading</b>: | Occupational and environmental medicine                                                                                                                                                                                                                                                                                                                                                                                                                                                                                                                                                                                                                                                                                                                                                                                                                                                       |
| Secondary Subject Heading:      | Cardiovascular medicine, Diagnostics, Epidemiology, Public health                                                                                                                                                                                                                                                                                                                                                                                                                                                                                                                                                                                                                                                                                                                                                                                                                             |
| Keywords:                       | metabolic syndrome, early detection, non invasive method, cardiovascular risk, working population                                                                                                                                                                                                                                                                                                                                                                                                                                                                                                                                                                                                                                                                                                                                                                                             |
|                                 |                                                                                                                                                                                                                                                                                                                                                                                                                                                                                                                                                                                                                                                                                                                                                                                                                                                                                               |

SCHOLARONE™  
Manuscripts

1  
2  
3 **Validation of a non-invasive method for the early detection of metabolic**  
4 **syndrome: a diagnostic accuracy test in a working population**  
5  
6  
7

8  
9 **Authors**

10 Manuel Romero-Saldaña<sup>1</sup>, Pedro Tauler<sup>2,3\*</sup>, Manuel Vaquero-Abellán<sup>4</sup>, Angel A.  
11 Lopez-Gonzalez<sup>5</sup>, Francisco José Fuentes-Jiménez<sup>6,7</sup>, Antoni Aguiló<sup>3,8</sup>, Carlos  
12 Álvarez-Fernández<sup>1</sup>, Guillermo Molina-Recio<sup>9</sup>, Miquel Bennasar-Veny<sup>3,7</sup>  
13  
14  
15

16 <sup>1</sup>Department of Occupational Safety and Health, Córdoba City Hall, Córdoba, Spain

17 <sup>2</sup>Department of Fundamental Biology and Health Sciences, University of the Balearic  
18 Islands, Palma, Spain

19 <sup>3</sup>Research Group on Evidence, Lifestyles & Health, Research Institute on Health  
20 Sciences (IUNICS), University of the Balearic Islands, Palma, Spain

21 <sup>4</sup>Department of Occupational Risk Prevention and Environmental Protection,  
22 University of Córdoba, Spain

23 <sup>5</sup>Prevention of Occupational Risks in Health Services, Balearic Islands Health  
24 Service, Palma, Spain

25 <sup>6</sup>IMIBIC, Reina Sofía University Hospital, University of Córdoba, Córdoba, Spain

26 <sup>7</sup>CIBER Physiopathology of Obesity and Nutrition CIBEROBN, ISCIII, Madrid, Spain

27 <sup>8</sup>Nursing and Physiotherapy Department, University of the Balearic Islands, Palma,  
28 Spain

29 <sup>9</sup>Department of Nursing, School of Medicine and Nursing, University of Córdoba,  
30 Spain  
31  
32  
33  
34  
35  
36  
37  
38  
39

40 **\*Corresponding author:** E-mail: pedro.tauler@uib.es Phone: +34971 259960  
41  
42  
43  
44

45 **Keywords:** metabolic syndrome; early detection; non-invasive method;  
46 cardiovascular risk; working population  
47  
48  
49

50 **Word count** (excluding title page, abstract, references, figures and tables): 4,453  
51  
52  
53  
54  
55  
56  
57  
58  
59  
60

## ABSTRACT

**Objectives.** A non-invasive method for the early detection of Metabolic Syndrome (NIM-MetS) using only Waist to Height Ratio (WHtR) and Blood Pressure (BP) has recently been published, with fixed cut-off values for gender and age. The aim of this study was to validate this method in a large sample of Spanish workers.

**Design.** A diagnostic test accuracy to assess the validity of the method was performed.

**Setting.** Occupational Health Services.

**Participants.** The studies were conducted in 2012-2016 on a sample of 60,799 workers from the Balearic Islands (Spain).

**Interventions.** The NCEP-ATP III criteria were used as the gold standard. NIM-MetS has been devised using classification trees (the CHAID, Chi-squared Automatic Interaction Detection method).

**Main outcome measures.** Anthropometric and biochemical variables to diagnose MetS. Sensitivity, specificity, validity index and Youden Index were determined to analyse the accuracy of the diagnostic test (NIM-MetS).

**Results.** Regarding the validation of the method, sensitivity was 54.7%, specificity 94.9% and validity index 91.2%. The cut-off value for WHtR was 0.54, ranging from 0.51 (lower age group) to 0.56 (higher) in the age groups. Variables more closely associated with MetS were WHtR (AUC=0.85; 95% CI: 0.84-0.86) and Systolic Blood Pressure (AUC=0.79; 95% CI: 0.78-0.80). The final cut-off values for the non-invasive method were  $WHtR \geq 0.56$  and  $BP \geq 128/80$  mmHg, which includes four levels of MetS risk (very low, low, moderate and high).

**Conclusions.** The analysed method has shown a high validity index (higher than 91%) for the early detection of MetS. It is a non-invasive method easy to apply and interpret in any health care setting. This method provides a scale of MetS risk which allows a more accurate detection and a more effective intervention.



**Strengths and limitations of this study**

- This is the first study assessing the validation of a non-invasive method for the early detection of metabolic syndrome (NIM-MetS).
- A diagnostic test study has been carried out in a large sample of healthy workers.
- MetS was ascertained by using the NCEP-ATP III definition, but there is a lack of consensus regarding MetS definition.
- A new procedure to measure MetS using variables with universal cut-off points (waist to height ratio and blood pressure) is suggested.
- The NIM-MetS method has shown high specificity, but low sensitivity.

## INTRODUCTION

The obesity epidemic which currently affects the world population has resulted in a general increase in the prevalence of metabolic syndrome (MetS).<sup>1-3</sup> Overweight and obesity are factors related to the onset of type 2 diabetes, hypertension, dyslipidemia and cardiovascular diseases (CVD). In particular, central obesity, which is defined as an excessive accumulation of abdominal fat, is an important predictor of cardiovascular risk and MetS.<sup>4,5</sup> Metabolic syndrome is defined as a pluripathological state characterized by the joint presence of several cardiovascular risk factors such as abdominal obesity, high blood pressure and altered glucose and lipid metabolism (low HDL-cholesterol and high triglycerides).<sup>6</sup>

Although there are several analytical/instrumental techniques for measuring the amount and distribution of body fat, there is no consensus about which the ideal method to calculate central adiposity is, nor how to decide which cut-off points provide greater accuracy, efficiency, sensitivity and specificity in all cases.<sup>7,8</sup>

A simple and inexpensive alternative to these instruments as a way of quantifying abdominal fat is to make anthropometric measurements of central obesity<sup>9</sup>. Waist circumference (WC), body mass index (BMI), waist to height ratio (WHtR), waist to hip ratio (WHR), hip to height ratio (HHR), body adiposity index (BAI), visceral adiposity index (VAI), body shape index (ABSI) and percentage of body fat (%BF) are some examples that can be found in numerous epidemiological studies, in which they try to relate indirectly intra-abdominal (visceral) fat with parameters such as morbidity and mortality, and also with prevalence of hypertension, diabetes, MetS, etc.<sup>10-13</sup>

Since the mid-1990s, the WHtR has been the most widely used anthropometric indicator and the one which has obtained the best predictive results for cardiovascular risk.<sup>14</sup> In a previous publication, a non-invasive method for early detection of MetS (NIM-MetS) using only two anthropometric variables (WHtR and blood pressure (BP)) has been proposed and validated.<sup>15</sup> This method suggests

1  
2  
3 WHtR $\geq$ 0.55 as the predictive threshold for the early detection of MetS for both men  
4 and women and, also, for any age stratum.  
5

6 The aim of this study is to validate the NIM-Mets method in a large  
7 representative sample of Spanish workers, to determine its predictive ability and to  
8 find out the stability of the cut-off value of WHtR $\geq$ 0.55 by gender and age.  
9  
10  
11  
12  
13

## 14 **MATERIAL AND METHODS**

### 15 *Design and sample*

16 A diagnostic test using a cross-sectional study was carried out on a working  
17 population from the Balearic Islands (Spain) between 2012 and 2016. Subjects  
18 participating in the study were randomly selected during their work health periodic  
19 assessments. Every day, each worker was assigned a number and half of the  
20 examined workers were randomly selected using a random number table. A total of  
21 69,581 workers were invited to participate in the study. However, 8,782 (12.6%)  
22 refused to participate and, thus, the final number of participants was 60,799  
23 workers (10.2% of the active population) belonging to different economic sectors  
24 (public administration, health services, etc.), aged 20 to 70 years old, and with  
25 57.3% of males and 42.7% of females.  
26  
27  
28  
29  
30  
31  
32  
33  
34  
35  
36

37 Participants were informed of the purpose of the study before they provided  
38 written informed consent to participate. The study protocol complied with the  
39 Declaration of Helsinki for conducting medical research involving human subjects,  
40 and was approved by the Institutional Review Board of the Mallorca Health  
41 Management Ethical Review Committee of GESMA.  
42  
43  
44  
45  
46  
47  
48

### 49 *Data collection and definition of variables*

50 To carry out the anthropometric measurements, recommendations contained in  
51 the manual "International Standards for Anthropometric Assessment (ISAK)" were  
52 followed.<sup>16</sup> All the measurements were made by specifically trained staff in order to  
53  
54  
55  
56  
57  
58  
59  
60

1  
2  
3 minimize the variation coefficients. Each measurement was performed three times,  
4 taking the average as the final value.  
5

6 The independent variables were classified into the following categories:

- 7  
8 a) Personal and health habits: gender, age and tobacco consumption.  
9  
10 b) Anthropometric measurements:  
11  
12 • Waist circumference (WC) in cm.  
13  
14 • Body mass index (BMI), calculated as body weight (kg) divided by height  
15 (m) squared, in kg/m<sup>2</sup>.  
16  
17 • Percentage of body fat (%BF), calculated according to the Deurenberg  
18 equation: %BF = 1.2x(BMI) + 0.23x(Age in years) - 10.8x(Gender) - 5.4.  
19  
20 Gender: females (0), males (1)  
21  
22 • Waist-to-height ratio (WHtR), calculated as waist circumference divided by  
23 height, both in cm.  
24  
25 • Body shape index (ABSI), calculated as  $WC/[(BMI)^{2/3}(height)^{1/2}]$ .  
26  
27 c) Blood measurements:  
28  
29 • Systolic blood pressure (SBP) in mmHg.  
30  
31 • Diastolic blood pressure (DBP) in mmHg.  
32  
33 • Total Cholesterol (mg/dL), LDL-Cholesterol (mg/dL), HDL-Cholesterol  
34 (mg/dL), glucose (mg/dL) and triglycerides (mg/dL).  
35  
36  
37  
38

39 Body weight was measured to the nearest 0.1 kg with an electronic scale (Seca  
40 700 scale, Seca GmbH, Hamburg). Height was measured to the nearest 0.5 cm with  
41 a stadiometer (Seca 220 (CM) Telescopic Height Rod for Column Scales, Seca  
42 GmbH, Hamburg). Waist circumference was measured half-way between the lower  
43 costal border and the iliac crest. The measurement was taken at the end of a  
44 normal expiration with the subject standing up, with their feet together and their  
45 arms hanging down by their sides.  
46  
47  
48  
49  
50  
51

52 Venous blood samples were taken from the antecubital vein in suitable  
53 vacutainers without anticoagulant in order to obtain serum. The blood samples  
54 were taken after a 12 h overnight fast. Participants sat and rested for at least 15  
55  
56  
57

1  
2  
3 minutes before the blood samples were taken. Serum was obtained after  
4 centrifugation (15 min, 1,000xg, 4°C) of the blood samples. The serum was stored  
5 at -20°C and analyses were performed within 3 days. Concentrations of glucose,  
6 cholesterol and triglycerides were measured in serum following the standard  
7 procedures used in clinical biochemistry laboratories with an autoanalyser  
8 (SYNCHRON CXH9 PRO, Beckman Coulter, Brea, CA, USA).  
9

10  
11  
12  
13  
14 Blood pressure was determined after the subjects had rested in the supine  
15 position for 10 minutes, using an automatic and calibrated sphygmomanometer  
16 (OMRON M3, OMRON Healthcare Europe, Spain). As in the case of the  
17 anthropometrical measurements, blood pressure was measured three times,  
18 leaving a one-minute gap between each measurement, and the average value was  
19 then calculated.  
20  
21  
22  
23  
24

25  
26 Presence of MetS was ascertained by using the criterion suggested by the  
27 NCEP-ATP III definition (when 3 of 5 of the following characteristics are present, a  
28 diagnosis of metabolic syndrome can be made):  
29  
30

- 31 • Abdominal obesity (WC $\geq$ 102 cm in males and WC  $\geq$ 88 cm in females).
- 32 • Triglycerides  $\geq$ 150 mg/dL.
- 33 • HDL-cholesterol <40 mg/dL in males and <50 mg/dL in females.
- 34 • Blood pressure  $\geq$ 130/85 mmHg.
- 35 • Fasting glucose  $\geq$ 100 mg/dL.
- 36
- 37
- 38
- 39
- 40
- 41
- 42

#### 43 *Non-invasive method for the early detection of Mets (NIM-MetS)*

44  
45 NIM-Mets is a new tool for screening for MetS based on the following  
46 anthropometric variables and cut-off values: WHtR $\geq$ 0.55 and BP $\geq$ 128/85 mmHg.

47  
48 This method classifies the population into two groups with different levels of risk:

- 49 • Workers with high risk of MetS (probability>61.7%): this group would  
50 contain those subjects with both positive variables, i.e. WHtR $\geq$ 0.55 and  
51 BP $\geq$ 128/85 mmHg.  
52  
53  
54  
55  
56  
57

- Workers with low risk of MetS (probability of 0.5-16.9%): this group would contain those subjects who have any of the other possible combinations between the two variables considered.

## Statistical Analysis

Statistical analysis was carried out using the IBM SPSS Statistics 22.0 software (SPSS / IBM, Chicago, IL, USA) and the Epidat version 4.2. (Department of Sanidade, Xunta de Galicia, Galicia, Spain). Continuous data are presented as mean values, standard deviation, and confidence interval at 95%. Categorical data are shown as frequency counts and percentages. All the data were tested for their normal distribution (Kolmogorov–Smirnov test with the Lilliefors adjustment).

Student's t-test and U Mann-Whitney test were used in the bivariate analyses for normal and non-normal distributed variables respectively. ANOVA tests with the post-hoc Bonferroni contrast method were carried out when more than two groups were considered in the analysis. The Levene test was used to determine the variance equality. The  $\chi^2$  test was applied to assess differences between groups in categorical variables.

Receiver Operator Characteristic (ROC) curves were performed and the Area Under the Curve (AUC) was calculated to find which explanatory variables best predict the onset of MetS. We obtained the cut-off value for each explanatory variable through the Youden index (JI) as  $JI = \text{Sensitivity} + \text{Specificity} - 1$ .

To measure the accuracy of the diagnostic test, sensitivity (S), specificity (SP), positive and negative predictive values (PPV and NPV), likelihood ratios (LH+ and LH-), validity index (VI) and JI were analysed. Validity index was calculated as the quotient between the sum of true positives and true negatives, divided by the total number of subjects, therefore representing the percentage of subjects properly classified by the test.

The modification of NIM-MetS was obtained from a clinical decision tree (classification) using the CHAID (Chi-squared Automatic Interaction Detection)

1  
2  
3 technique as a growth method. The statistical significance level for splitting nodes  
4 and merging categories was  $p < 0.05$ , and significance values were corrected by the  
5 Bonferroni method, with a maximum number of iterations of 2,000.  
6  
7

8 The level of statistical significance was fixed in all the contrasts for an alpha  
9 error below 5%, and the confidence intervals were calculated with a 95% level of  
10 confidence.  
11  
12  
13

#### 14 Patient and public involvement

15  
16  
17  
18 Patients were not involved in setting the research question and in the study design.  
19 All patients were randomly selected during their work health periodic assessments  
20 to participate in the study and they were interviewed face-to-face by trained  
21 researchers for detailed explanation of the purpose of this research and informed  
22 consent at the beginning. No patients were involved in data analysis or in the  
23 manuscript writing. Results of the research will not be disseminated to the patients.  
24  
25  
26  
27  
28  
29  
30  
31

## 32 **RESULTS**

### 33 *Characteristics of the study sample*

34  
35  
36 Of the 60,799 workers, 34,827 were male (57.3%). The overall mean age was  
37 40 years (39.9-40.1) (Table 1). Among anthropometrical and blood parameters  
38 shown in Table 1, women showed higher %BF and HDL-Cholesterol values  
39 ( $p < 0.001$ ), while men showed significant higher values for the rest of the  
40 parameters shown in this table. The prevalence of smokers was 34.8% (36.6% in  
41 men and 32.5% in women), and 17.6% of participants were obese (20.0% in men  
42 and 14.4% women). With regard to drug treatments, 6.6% of participants were  
43 undergoing antihypertensive treatment, 3.2% lipid lowering treatments and 1.7%  
44 antidiabetic treatments. Finally, the overall prevalence of MetS was 9.0%, with  
45 11.8% in men and 5.4% in women ( $p < 0.001$ ).  
46  
47  
48  
49  
50  
51  
52  
53  
54  
55  
56  
57  
58  
59  
60

### *NIM-MetS validation*

Table 2 shows the results of diagnostic tests after applying the NIM-Mets method compared with NCEP-ATP III as a control test. Overall, the indicators of the NIM-MetS method validation were as follows: S = 54.7% (53.4-56.0), SP = 94.9% (94.7-95.0), and VI = 91.2% (91.0-91.5). The sensitivity was higher in men (59.4%) than in women (40.9%).

As regards the NIM-MetS safety indicators, results in the total sample were: PPV = 51.3% (50.0-52.6) and NPV = 95.5 (95.3-95.7). By gender, PPV was higher in men (51.4%) than in women (50.8%), while NPV was higher in women (96.7%) than in men (94.5%). Finally, the overall JI was 0.50 (0.48 to 0.51), higher in men (0.52) than in women (0.39).

A second question to be dealt with in this research was to compare the cut-off value for WHtR proposed by NIM-MetS with that obtained in the study sample, and thus determine its variability according to the gender variable and in different age groups (Table 3). In the whole sample (n = 60,799), a cut-off value of 0.54 was obtained for WHtR. In the group of men (n = 34,827), the resulting threshold was 0.56, while for women (n = 25,972) it was 0.53.

It can be seen how the cut-off point increases with age. For men, it ranged from 0.55 (20-30 years old) to 0.56 ( $\geq 51$  years), whereas for women it was between 0.51 (20-30 years) and 0.55 ( $\geq 51$  years). The differences between the cut-off values for men and women become narrower as the age increased.

Figure 1 shows the results for the anthropometric variables' ROC curves. WHtR achieved the highest AUC 0.85 (95% CI: 0.84 to 0.86), with a cut-off value of 0.54, reaching top values of S = 68.5%, SP = 87.0% and JI = 0.56. The second variable with the highest AUC was WC, with 0.83 (95% CI: 0.82 to 0.84), a cut-off value of 89.1 cm and S = 72.5, SP = 77.6% and JI = 0.5. BMI with an AUC = 0.80 BMI and SBP with AUC = 0.79 also stood out.



1  
2  
3 **Figure 1.** Anthropometric variables. ROC curves, area under the curve, cut-off  
4 points and efficacy indicators.  
5  
6  
7

8  
9  
10 After that, different clinical decision trees were made with a range of cut-off  
11 values for WHtR and BP (Table 4). Thus, the range of cut-offs for WHtR was defined  
12 by 8 thresholds between 0.54 and 0.57, and included, among others, the cut-off  
13 value proposed by NIM-MetS ( $WHtR \geq 0.55$ ) and the cut-off value for the total  
14 sample ( $WHtR \geq 0.54$ ). In addition, three models were established for BP:  
15  $BP \geq 128/80$  mmHg (cut-off values obtained for SBP and DBP as ROC curves, shown  
16 in Figure 2);  $BP \geq 128/85$  mmHg (BP cut-off values proposed by NIM-MetS); and  
17 finally, only  $SBP \geq 128$  mmHg (second covariate with the highest adjusted OR in the  
18 multiple logistic regression). In this way, 24 clinical decision trees were set up using  
19 CHAID methodology. Each tree comprised of a parent node (Node 0), two primary  
20 subsidiary nodes (Nodes 1 and 2) and four secondary subsidiary nodes (Nodes 3, 4,  
21 5 and 6). Each of the last four nodes denoted the probability of having MetS. Thus,  
22 Node 3 corresponds to the probability that a worker has MetS when both  
23 anthropometric variables are negative (below cut-off values). Node 4 indicates the  
24 probability that a worker has MetS when BP is above the cut-off value and WHtR  
25 below. Node 5 represents the probability that a worker has MetS when BP is lower  
26 than the cut-off value and WHtR is above. Finally, Node 6 shows the probability  
27 that a worker suffers from MetS when both variables are positive (above the cut-off  
28 values). The model  $BP \geq 128/80$  mmHg was chosen because it had the highest  
29 Youden index value (greatest sensitivity and specificity combined) at each of the  
30 WHtR cut-off points (Table 4).  
31  
32  
33  
34  
35  
36  
37  
38  
39  
40  
41  
42  
43  
44  
45  
46  
47  
48  
49

50 **Figure 2.** WHtR cut-off point resolution.  
51  
52  
53

54 The next step was to select the final cut-off value for WHtR. To do this, the  
55 method's probability of detection (Node 6 value) and the Youden index for the BP  
56  
57

1  
2  
3 model chosen ( $BP \geq 128 / 80$  mmHg) were plotted for each WHtR cut-off value  
4  
5 (Figure 2).

6  
7 It was noted that the probability of detection of MetS in each tree (Node 6  
8 value) and the WHtR threshold, as well as the Youden index and the WHtR  
9 threshold, follow linear functions, in which the equations of its lines are as follows:

- 10  
11 • Probability MetS (Node 6) =  $5.534 * WHtR - 2.58$
- 12  
13 • Youden index =  $-1.758 * WHtR + 1.486$

14  
15 Thus, the final threshold value for WHtR was determined by the cut-off point of  
16 both lines:  $WHtR = 0.56$  (Figure 2).

17  
18 The resulting new method for the early detection of MetS (new NIM-MetS)  
19 includes these conditions:  $WHtR \geq 0.56$  and  $BP \geq 128/80$  mmHg. Figure 3 shows the  
20 decision tree created from these variables and cut-off points. The sensitivity of the  
21 proposed method was 56.4%, specificity was 94.5%, validity index was 91.1% and  
22 the Youden index 0.51.  
23  
24  
25  
26  
27  
28  
29  
30

31 **Figure 3.** Definitive decision tree, new NIM-Mets proposed.  
32  
33  
34

35 Finally, from the probabilities obtained in Nodes 3, 4, 5 and 6, a risk gradient  
36 for MetS was developed, according to the WHtR and BP covariates and the  
37 proposed cut-off values. Thus, those subjects with lower WHtR and BP values than  
38 the cut-off point have a very low probability of suffering from MetS ( $p_{MetS} =$   
39  $0.4\%$ ). Low risk ( $p_{MetS} = 8.3\%$ ) would be found only in those individuals with BP  
40 values over  $128/80$  mmHg but low WHtR. A moderate level of risk ( $p_{MetS} =$   
41  $16.3\%$ ) would include normotensive subjects who had a  $WHtR \geq 0.558$ . Finally,  
42 subjects with  $WHtR \geq 0.56$  and  $BP \geq 128/80$  mmHg, would have a 50.5% risk of  
43 having MetS.  
44  
45  
46  
47  
48  
49  
50  
51  
52  
53

## 54 **DISCUSSION**

55  
56  
57  
58  
59  
60

1  
2  
3 The validation of a non-invasive method for the early detection of MetS (NIM-  
4 MetS) has been determined. The validation was carried out from a study of  
5 diagnostic tests conducted in Spanish Caucasian adult workers and using, as a  
6 reference test, the NCEP-ATP III criteria for the diagnosis of MetS. The early  
7 detection of MetS is the key to improving the quality of life of our population, since  
8 it prevents the appearance of associated complications such as CVD, type 2  
9 Diabetes Mellitus and, even, cancer.<sup>17-20</sup>

10  
11  
12  
13  
14  
15  
16 NIM-MetS has shown a high validity index both in men (88.6%) and in women  
17 (94.7%). Overall, for every 100 workers, the method classified properly 91 cases.  
18 Similarly, NIM-MetS has proved to be highly specific, reaching an overall specificity  
19 of 94.9% (92.5% in men and 97.8% in women). Both VI and the SP recorded  
20 values above those achieved by this method in another Spanish population,<sup>15</sup> where  
21 it obtained an IV = 89.5% and 91.5% specificity. For sensitivity, the overall figure  
22 was 56.4% (59.4% for men and 40.9% for women), while in the original  
23 population, the overall sensitivity was 77.9%. Because it supposes a simple, easy  
24 to apply even in large populations and non-invasive method, it could be defined as  
25 a useful method in spite of the sensitivity found in the present study could be  
26 considered as moderate. The high specificity together with the high validity index  
27 shown for the screening of the cardiometabolic risk are characteristics that increase  
28 the acceptability of the method.

29  
30  
31  
32  
33  
34  
35  
36  
37  
38  
39  
40  
41 Although the indicators of validation and accuracy of a screening test  
42 (sensitivity and specificity) are intrinsic properties of the test itself and do not  
43 depend on the prevalence of the disease considered, this does not prevent these  
44 indicators from being affected by characteristics of the population they are applied  
45 to.<sup>21</sup> In fact, the most common observation is that a test for early detection or  
46 diagnosis alters its sensitivity and specificity depending on these characteristic  
47 features of the population. Therefore, the main differences between the two  
48 populations (the Balearic and the one considered in the previous study developed in  
49 Cordoba<sup>15</sup>) were analysed, highlighting those features of the Balearic population

1  
2  
3 which contributed to a decreased sensitivity: a younger population (40.0 vs. 45.1  
4 years), more females (42.7% vs. 32.1%), more smokers (34.8% vs. 28.6%) and  
5 lower values for WC (82.9 vs. 87.8 cm), WHtR (0.49 vs. 0.52) and BMI (26.1 vs.  
6 26.5 kg/m<sup>2</sup>).  
7  
8  
9

10 As regards the safety indicators of the test, the positive and negative predictive  
11 values, they are definitely affected by the prevalence of the population, lowering  
12 the PPV when the prevalence of MetS is lower. In this way, although we found a  
13 lower prevalence of MetS in the Balearic Islands than in Cordoba (9.0% vs. 13.9%),  
14 the NIM-Mets produced a lower PPV in the Balearic Islands (51.3% vs. 61.7%),  
15 while the negative predictive value remained very similar (95.5% vs. 95.9%).  
16  
17  
18  
19  
20  
21

22 Screening tests are often used in clinical practice. However, there are very few  
23 methods for the early detection of MetS other than the currently known diagnostic  
24 criteria, and there are even fewer non-invasive screening tests. A study in the  
25 Republic of Korea examined the validity of a test for the early detection of MetS  
26 based on the muscle-to-fat ratio.<sup>22</sup> The study was conducted on 6,256 participants,  
27 with a sensitivity of 68.6% in men and 76.0% in women, and a specificity of 63.8%  
28 in men and 53.8% in women. Miller et al.<sup>23</sup> proposed a screening method for MetS  
29 in 745 young adults (18-29 years old) in the United States, based on making  
30 decision trees with the CHAID methodology and using all the criteria for MetS. The  
31 method had a validity rate of 89.4% and a sensitivity rate of 61.7%. Finally, De  
32 Kroon et al.<sup>24</sup> conducted a screening test for MetS in 642 young people (aged 17-  
33 28) in the Netherlands using anthropometric variables (BMI, WC and BP). The  
34 sensitivity of the method was 68.7% and the validity index was 95.6%.  
35  
36  
37  
38  
39  
40  
41  
42  
43  
44  
45

46 Another hypothesis put forward in this research was to test whether the cut-off  
47 value proposed by NIM-MetS for WHtR ( $\geq 0.55$ ) would be reproduced in a large  
48 sample (60,799 workers from the Balearic Islands), and if it was also valid for both  
49 men and women and also for different age groups. WHtR had a cut-off value of  
50 0.54 for the total sample, with 0.56 men and 0.53 for women. As regards age  
51  
52  
53  
54  
55  
56  
57  
58  
59  
60

1  
2  
3 groups, the WHtR threshold increased with age, with 0.55-0.56 for men and 0.51-  
4 0.55 for women. These differences were reduced in the total sample (0.53-0.56).

5  
6 It is noteworthy that several authors have proposed a universal 0.50 cut-off  
7 point for WHtR, both to detect MetS and to predict cardiometabolic risk and overall  
8 cardiovascular mortality.<sup>25-28</sup> However, in Spain, a cross-sectional study in the  
9 general population (n = 6,279, mean age = 43 years) showed that WHtR was the  
10 best anthropometric predictor of MetS (NCEP-ATP III), and the authors proposed a  
11 cut-off value of 0.55, with which they obtained a sensitivity of 91.0% and a  
12 specificity of 64.0%.<sup>28</sup> This cut-off value is very similar to the one proposed from  
13 the results obtained in the present study.

14  
15 In Chile, two important child population studies were conducted by Arnaiz et  
16 al., showing results which match the value of the cut-off point proposed in the  
17 present study. Thus, in the first study, conducted on 209 schoolchildren (mean age  
18 of 11.5), the authors obtained a cut-off value of 0.55 WHtR for MetS,<sup>29</sup> while in the  
19 second study, performed in 2,980 children aged 6-14 (mean age of 9.9), the  
20 authors concluded that the WHtR did not change with age and gender and,  
21 therefore, a universal cut-off value could be agreed for both children and adults.<sup>30</sup>

22  
23 The prospective study by Koch et al.<sup>31</sup> carried out in Chile on about 6,714 men  
24 and 6,340 women, evaluating the relationship between various anthropometric  
25 indices of adiposity, cardiovascular risk factors and mortality for a cut-off value of  
26 0.55 obtained a sensitivity of 75.8% and a specificity of 73.3% for men, and a  
27 sensitivity of 77.6% and specificity of 56.3% for women.

28  
29 In addition, several investigations conducted in non-European and non-Hispanic  
30 populations also concur on this threshold of WHtR for MetS. Thus, Obeidat et al.<sup>32</sup> in  
31 a study on a Jordanian population (n=630, aged 20-70 years) reported a cut-off  
32 value of 0.56 in men and 0.52 in women; in India, Rajput et al.,<sup>33</sup> achieved a  
33 threshold of 0.52 for men and women (n = 3,042) in all locations (rural or urban  
34 areas); and in China, He et al.,<sup>34</sup> in a descriptive study of 1,068 adult subjects,  
35 reported a cut-off value for WHtR of 0.5 for men and women alike.

1  
2  
3 When the NIM-MetS method was applied in this new larger sample of 60,799  
4 workers from the Balearic Islands, the method has showed again the same  
5 variables obtained in the original study performed in Cordoba.<sup>15</sup> In the multiple  
6 logistic regression, WHtR and BP achieved the highest adjusted OR values. Thus,  
7 WHtR was the anthropometric index that best discriminated MetS presence, with an  
8 adjusted OR value of 4.4 (3.9-4.9), while SBP obtained an adjusted OR value of 3.8  
9 (3.5-4.1). In addition, the cut-off values obtained for WHtR and for BP are very  
10 similar to those of the original method.  
11  
12  
13  
14  
15  
16  
17

18 Several investigations have confirmed the high predictive ability of WHtR for  
19 MetS and CVD. In the systematic review conducted by Ashwell et al.,<sup>35</sup> in which 10  
20 out of the 31 studies analysed the association between anthropometric  
21 measurements of central obesity and MetS, WHtR had the highest AUC value 0.76  
22 (men) and 0.75 (women). This contrasted with WC, which obtained an AUC value of  
23 0.75 (equal for men and women) and BMI, with an AUC value of 0.72 (men and  
24 women). Similarly, a meta-analysis conducted by Savva et al.,<sup>36</sup> in which 8 out of  
25 the 24 studies included compared WHtR (cut-off point 0.5) with BMI (cut-off point  
26 of 23 for the Asian population and 25 for the rest) for cardiometabolic risk in an  
27 Asian and non-Asian population, and concluded that WHtR showed a stronger  
28 association with MetS than with BMI.  
29  
30  
31  
32  
33  
34  
35  
36  
37  
38

39 Through the present study, the NIM-MetS method has been reproduced, and  
40 definitive cut-off values have been proposed for WHtR (0.56) and BP (128-80  
41 mmHg), from which a sensitivity rate of 56.4%, a specificity rate of 94.5%, a  
42 validity index of 91.1% and a Youden index of 0.51 are obtained. On the other  
43 hand, finally, the long-term ability of MetS to predict CVD has shown to be limited  
44 by the dichotomous (binary) and qualitative nature of the classic diagnostic criteria  
45 for MetS. An innovative aspect that NIM-MetS brings is to provide a gradient or  
46 scale of risk of developing MetS which is divided into four risk levels: Very low risk  
47 (probability = 0.4%), low risk (probability = 8.3%), moderate risk (probability =  
48 16.4%) and high risk (probability = 50.5%). In this way, health professionals can  
49  
50  
51  
52  
53  
54  
55  
56  
57

1  
2  
3 take certain steps depending on the level of risk of MetS and promote a more  
4 accurate and early detection of the possible complications associated with CVD and  
5 MetS. Along the same lines, there have been several studies using methods based  
6 on scores to quantify the amount of risk accumulated by the presence of the  
7 components that define the metabolic syndrome (Metabolic Syndrome Severity  
8 Score).<sup>37,38</sup>  
9  
10  
11  
12  
13  
14  
15

### 16 *Limitations*

17  
18 This study presents some limitations that must be acknowledged. First, we  
19 must bear in mind that there are different definitions and criteria to determine the  
20 presence of MetS. In this study, presence of MetS was ascertained using the NCEP-  
21 ATP III definition as a gold standard, which supposes one of the definitions most  
22 used and widely accepted by the international community and the WHO. In  
23 addition, the study data refers to Caucasian population. Thus, results could not  
24 have great applicability to other populations.  
25  
26  
27  
28  
29  
30

31 Although in the present study NIM-MetS methodology has been tested in a very  
32 large sample of workers, the sensitivity found was lower than that obtained in the  
33 original study leading to the proposal of the method.<sup>15</sup> This could be related to  
34 differences in the study samples, with the workers from the Balearic Islands  
35 showing lower prevalence of SMet and obesity and being younger. Although the  
36 prevalence of MetS does not affect sensitivity and specificity, this lower prevalence  
37 influences PPV and NPV.  
38  
39  
40  
41  
42  
43  
44

45 In spite of the percentage of participation is high (87.4%), we should take into  
46 account that it is not the total target population and, therefore, a bias could have  
47 been introduced in the results. Furthermore, participants highly concerned about  
48 their health, and thus probably healthier, along with those with a diagnosed  
49 disease, could represent the greater proportion of workers attending health  
50 examinations because these were not compulsory. This causes bias in the  
51 recruitment procedure as, in addition, it is not well-known whether the healthier  
52  
53  
54  
55  
56  
57  
58  
59  
60

1  
2  
3 workers or the ones with a diagnosed disease are the ones with the greatest  
4 interest in the checks. Nor can we ignore the bias of the healthy worker, since  
5 those workers with serious illnesses would not be currently active. In addition, it is  
6 not well known if the healthiest workers or those with a diagnosed illness have the  
7 greatest interest in checks.  
8  
9  
10  
11  
12

### 13 **Conclusions**

14  
15  
16 The NIM-MetS has proved to be a valid method for the early detection of MetS  
17 in a healthy worker population. It is a simple, economical and quick non-invasive  
18 test which is easy to apply and interpret in any health care setting (primary health  
19 care, hospitals, occupational health) as well as in other settings (education, sport,  
20 etc.). WHtR is the best predictor of MetS and its cut-off point can be used for both  
21 genders and for different age groups. The clinical decision tree that produces the  
22 NIM-MetS uses WHtR (0.56) and BP (128/80 mmHg), and obtains high specificity  
23 and diagnostic validity. The NIM-MetS provides a gradient or risk scale which allows  
24 a more accurate and earlier detection of CVD in subjects with risk of MetS.  
25  
26  
27  
28  
29  
30  
31  
32  
33  
34

### 35 **Contributor ship statement**

36  
37 Manuel Romero-Saldana contributed to the conception, design, acquisition and  
38 analysis/interpretation of data, drafted the manuscript, critically revised the  
39 manuscript and gave his final approval to the text, while also agreeing to be  
40 accountable for the integrity and accuracy of all aspects of the work.  
41  
42  
43

44 Pedro Tauler contributed to the data collection, analysis, critically revised the  
45 manuscript, gave his final approval, and agrees to be accountable for the integrity  
46 and accuracy of all aspects of the work.  
47  
48  
49

50 Manuel Vaquero-Abellán contributed to the analysis and interpretation, critically  
51 revised the manuscript, gave his final approval, and agrees to be accountable for  
52 the integrity and accuracy of all aspects of the work.  
53  
54  
55  
56  
57



1  
2  
3 Angel A. Lopez-Gonzalez contributed to the data collection, analysis, critically  
4 revised the manuscript, gave his final approval, and agrees to be accountable for  
5 the integrity and accuracy of all aspects of the work.  
6  
7

8 Francisco J. Fuentes-Jimenez contributed to the analysis, critically revised the  
9 manuscript, gave his final approval, and agrees to be accountable for the integrity  
10 and accuracy of all aspects of the work.  
11  
12

13 Antoni Aguilo contributed to the conception, critically revised the manuscript, gave  
14 his final approval, and agrees to be accountable for the integrity and accuracy of all  
15 aspects of the work.  
16  
17

18 Carlos Alvarez-Fernandez contributed to the conception, critically revised the  
19 manuscript, gave his final approval, and agrees to be accountable for the integrity  
20 and accuracy of all aspects of the work.  
21  
22

23 Guillermo Molina-Recio contributed to the analysis and interpretation, critically  
24 revised the manuscript, gave her final approval and agrees to be accountable for  
25 the integrity and accuracy of all aspects of the work.  
26  
27

28 Miquel Bennasar-Veny contributed to the design, acquisition and  
29 analysis/interpretation of data, critically revised the manuscript, gave his final  
30 approval, and agrees to be accountable for the integrity and accuracy of all aspects  
31 of the work.  
32  
33

### 34 **Competing interests**

35 None declared.  
36  
37  
38  
39

### 40 **Funding**

41 This research received no specific grant from any funding agency in the public,  
42 commercial, or not-for-profit sectors.  
43  
44  
45

### 46 **Data sharing statement**

47  
48  
49  
50  
51  
52  
53

1  
2  
3 Extra data can be accessed via the Dryad data repository at <http://datadryad.org/>  
4 with the doi:10.5061/dryad.cb51t54  
5  
6  
7  
8  
9  
10  
11  
12  
13  
14  
15  
16  
17  
18  
19  
20  
21  
22  
23  
24  
25  
26  
27  
28  
29  
30  
31  
32  
33  
34  
35  
36  
37  
38  
39  
40  
41  
42  
43  
44  
45  
46  
47  
48  
49  
50  
51  
52  
53  
54  
55  
56  
57  
58  
59  
60

For peer review only

**REFERENCES**

1. Swinburn BA, Sacks G, Hall KD, *et al.* The global obesity pandemic: shaped by global drivers and local environments. *Lancet* 2011;**378**:804-14. doi: 10.1016/S0140-6736(11)60813-1
2. Tauler P, Bennasar-Veny M, Morales-Asencio JM, *et al.* Prevalence of premorbid metabolic syndrome in Spanish adult workers using IDF and ATPIII diagnostic criteria: relationship with cardiovascular risk factors. *PLoS One* 2014;**9**:e89281. doi: 10.1371/journal.pone.0089281
3. Yamaoka K, Tango T. Effects of lifestyle modification on metabolic syndrome: a systematic review and meta-analysis. *BMC Med* 2012;**10**:138. doi: 10.1186/1741-7015-10-138
4. Guh DP, Zhang W, Bansback N, Amarsi Z, Birmingham CL, Anis AH. The incidence of co-morbidities related to obesity and overweight: a systematic review and meta-analysis. *BMC Pub Health* 2009;**9**:88. doi: 10.1186/1471-2458-9-88. PubMed PMID: 19320986
5. Schneider HJ, Klotsche J, Silber S, Stalla GK, Wittchen HU. Measuring abdominal obesity: effects of height on distribution of cardiometabolic risk factors risk using waist circumference and waist-to-height ratio. *Diab Care* 2011;**34**:e7. doi: 10.2337/dc10-1794
6. Zimmet PZ, Alberti KG, Shaw JE. Mainstreaming the metabolic syndrome: a definitive definition. *Med J Aust* 2005;**183**:175-6.
7. Bennasar-Veny M, Lopez-Gonzalez AA, Tauler P, *et al.* Body adiposity index and cardiovascular health risk factors in Caucasians: a comparison with the body mass index and others. *PLoS One* 2013;**8**:e63999. doi: 10.1371/journal.pone.0063999
8. Rosales M. Antropometría en el diagnóstico de pacientes obesos: una revisión. *Nutr Hosp* 2012;**27**:1803-9.

- 1  
2  
3 9. Edston E. A correlation between the weight of visceral adipose tissue and  
4 selected anthropometric indices: an autopsy study. *Clin Obes* 2013;**3**(3-4):84-9.  
5 doi: 10.1111/cob.12021  
6
- 7  
8 10. Kodama S, Horikawa C, Fujihara K, et al. Comparisons of the strength of  
9 associations with future type 2 diabetes risk among anthropometric obesity  
10 indicators, including waist-to-height ratio: a meta-analysis. *Am J Epidemiol*  
11 2012;**176**:959-69. doi: 10.1093/aje/kws172  
12
- 13  
14 11. Petursson H, Sigurdsson JA, Bengtsson C, Nilsen TI, Getz L. Body  
15 configuration as a predictor of mortality: comparison of five anthropometric  
16 measures in a 12 year follow-up of the Norwegian HUNT 2 study. *PLoS One*  
17 2011;**6**:e26621. doi: 10.1371/journal.pone.0026621  
18
- 19  
20 12. Taylor AE, Ebrahim S, Ben-Shlomo Y, et al. Comparison of the associations  
21 of body mass index and measures of central adiposity and fat mass with coronary  
22 heart disease, diabetes, and all-cause mortality: a study using data from 4 UK  
23 cohorts. *Am J Clin Nutr* 2010;**91**:547-56. doi: 10.3945/ajcn.2009.28757.  
24
- 25  
26 13. Lam BC, Koh GC, Chen C, Wong MT, Fallows SJ. Comparison of Body Mass  
27 Index (BMI), Body Adiposity Index (BAI), Waist Circumference (WC), Waist-To-Hip  
28 Ratio (WHR) and Waist-To-Height Ratio (WHtR) as predictors of cardiovascular  
29 disease risk factors in an adult population in Singapore. *PLoS One*  
30 2015;**10**:e0122985. doi: 10.1371/journal.pone.0122985  
31
- 32  
33 14. Hsieh SD, Yoshinaga H. Waist/height ratio as a simple and useful predictor  
34 of coronary heart disease risk factors in women. *Intern Med* 1995;**34**:1147-52.  
35
- 36  
37 15. Romero-Saldana M, Fuentes-Jimenez FJ, Vaquero-Abellan M, Alvarez-  
38 Fernandez C, Molina-Recio G, Lopez-Miranda J. New non-invasive method for early  
39 detection of metabolic syndrome in the working population. *Eur J Cardiovasc Nurs*  
40 2016;**15**:549-558. doi: 10.1177/1474515115626622  
41
- 42  
43 16. Stewart A, Marfell-Jones M, Olds T, de Ridder H. *International standards for*  
44 *anthropometric assessment*. Lower Hutt, New Zealand: ISAK; 2011.  
45  
46  
47  
48  
49  
50  
51  
52  
53  
54  
55  
56  
57  
58  
59  
60

17. Braun S, Bitton-Worms K, LeRoith D. The link between the metabolic syndrome and cancer. *Int J Biol Sci* 2011;**7**:1003-15.
18. Devers MC, Campbell S, Simmons D. Influence of age on the prevalence and components of the metabolic syndrome and the association with cardiovascular disease. *BMJ Open Diab Res Care* 2016;**4**:e000195. doi: 10.1136/bmjdr-2016-000195
19. Guo Y, Musani SK, Sims M, et al. Assessing the added predictive ability of a metabolic syndrome severity score in predicting incident cardiovascular disease and type 2 diabetes: the Atherosclerosis Risk in Communities Study and Jackson Heart Study. *Diabetol Metab Syndr* 2018;**10**:42. doi: 10.1186/s13098-018-0344-3
20. Gami AS, Witt BJ, Howard DE, et al. Metabolic syndrome and risk of incident cardiovascular events and death: a systematic review and meta-analysis of longitudinal studies. *J Am Coll Cardiol* 2007;**49**:403-14. doi: 10.1016/j.jacc.2006.09.032
21. Brenner H, Gefeller O. Variation of sensitivity, specificity, likelihood ratios and predictive values with disease prevalence. *Stat Med* 1997;**16**(9):981-91.
22. Park J, Kim S. Validity of muscle-to-fat ratio as a predictor of adult metabolic syndrome. *J Phys Ther Sci* 2016;**28**:1036-45.
23. Miller B, Fridline M, Liu PY, Marino D. Use of CHAID decision trees to formulate pathways for the early detection of metabolic syndrome in young adults. *Comput Math Methods Med* 2014;**2014**:242717. doi: 10.1155/2014/242717
24. de Kroon ML, Renders CM, Kuipers EC, et al. Identifying metabolic syndrome without blood tests in young adults--the Terneuzen Birth Cohort. *Eur J Public Health* 2008;**18**:656-60. doi: 10.1093/eurpub/ckn056
25. Ashwell M, Hsieh SD. Six reasons why the waist-to-height ratio is a rapid and effective global indicator for health risks of obesity and how its use could simplify the international public health message on obesity. *Int J Food Sci Nutr* 2005;**56**:303-7. doi: 10.1080/09637480500195066

- 1  
2  
3 26. Bellido D, Lopez de la Torre M, Carreira J, et al. [Anthropometric measures  
4 of central abdominal fat and discriminant capacity for metabolic syndrome in a  
5 Spanish population]. *Clin Investig Arterioscler* 2013;**25**:105-9. doi:  
6 10.1016/j.arteri.2013.05.007  
7  
8  
9  
10 27. Browning LM, Hsieh SD, Ashwell M. A systematic review of waist-to-height  
11 ratio as a screening tool for the prediction of cardiovascular disease and diabetes:  
12 0.5 could be a suitable global boundary value. *Nutr Res Rev* 2010;**23**:247-69. doi:  
13 10.1017/S0954422410000144  
14  
15  
16 28. Cristo Rodriguez Perez MD, Cabrera De Leon A, Aguirre-Jaime A, et al. [The  
17 waist to height ratio as an index of cardiovascular risk and diabetes]. *Med Clin*  
18 *(Barc)* 2010;**134**:386-91. doi: 10.1016/j.medcli.2009.09.047  
19  
20  
21 29. Arnaiz P, Marin A, Pino F, et al. [Waist height ratio, ultrasensitive c reactive  
22 protein and metabolic syndrome in children]. *Rev Med Chil* 2010;**138**:1378-85. doi:  
23 /S0034-98872010001200006  
24  
25  
26 30. Arnaiz P, Grob F, Cavada G, et al. [Waist-to-height ratio does not change  
27 with gender, age and pubertal stage in elementary school children]. *Rev Med Chil*  
28 2014;**142**:574-8. doi: 10.4067/S0034-98872014000500004  
29  
30  
31 31. Koch E, Romero T, Manríquez L, Taylor A, Román C, Paredes M. Razón  
32 cintura-estatura: Un mejor predictor antropométrico de riesgo cardiovascular y  
33 mortalidad en adultos chilenos. Nomograma diagnóstico utilizado en el Proyecto  
34 San Francisco. *Rev Chil de Cardiol* 2008;**27**:23-35.  
35  
36  
37 32. Obeidat AA, Ahmad MN, Haddad FH, Azzeh FS. Evaluation of Several  
38 Anthropometric Indices of Obesity as Predictors of Metabolic Syndrome in Jordanian  
39 Adults. *Nutr Hosp* 2015;**32**:667-77. doi: 10.3305/nh.2015.32.2.9063  
40  
41  
42 33. Rajput R, Rajput M, Bairwa M, Singh J, Saini O, Shankar V. Waist height  
43 ratio: A universal screening tool for prediction of metabolic syndrome in urban and  
44 rural population of Haryana. *Indian J Endocrinol Metab* 2014;**18**:394-9. doi:  
45 10.4103/2230-8210.131201  
46  
47  
48  
49  
50  
51  
52  
53  
54  
55  
56  
57  
58  
59  
60

- 1  
2  
3 34. He YH, Chen YC, Jiang GX, et al. Evaluation of anthropometric indices for  
4 metabolic syndrome in Chinese adults aged 40 years and over. *Eur J Nutr*  
5 2012;**51**:81-7. doi: 10.1007/s00394-011-0195-2  
6  
7  
8 35. Ashwell M, Gunn P, Gibson S. Waist-to-height ratio is a better screening tool  
9 than waist circumference and BMI for adult cardiometabolic risk factors: systematic  
10 review and meta-analysis. *Obes Rev* 2012;**13**:275-86. doi: 10.1111/j.1467-  
11 789X.2011.00952.x  
12  
13  
14 36. Savva SC, Lamnisis D, Kafatos AG. Predicting cardiometabolic risk: waist-  
15 to-height ratio or BMI. A meta-analysis. *Diab Metab Syndr Obes* 2013;**6**:403-19.  
16 doi: 10.2147/DMSO.S34220  
17  
18  
19 37. Mark D, De Boer MD, Gurka MJ, Woo JG, Morrison JA. Severity of the  
20 metabolic syndrome as a predictor of type 2 diabetes between childhood and  
21 adulthood: the Princeton Lipid Research Cohort Study. *Diabetologia* 2015;**58**:2745-  
22 52  
23  
24  
25 38. Wiley JF, Carrington MJ. A metabolic syndrome severity score: A tool to  
26 quantify cardio-metabolic risk factors. *Prev Med* 2016;**88**:189-95. doi:  
27 10.1016/j.ypmed.2016.04.006  
28  
29  
30  
31  
32  
33  
34  
35  
36  
37  
38  
39  
40  
41  
42  
43  
44  
45  
46  
47  
48  
49  
50  
51  
52  
53  
54  
55  
56  
57  
58  
59  
60

**Table 1. Characteristics of the sample according to gender**

| Variable                          | Total<br>n=60,799      | Men<br>n= 34,827       | Women<br>n= 25,972     | p      |
|-----------------------------------|------------------------|------------------------|------------------------|--------|
|                                   | Mean (95% CI) or n (%) | Mean (95% CI) or n (%) | Mean (95% CI) or n (%) |        |
| <b>Age</b> (years)                | 40.0 (39.9 – 40.1)     | 40.4 (40.3 – 40.5)     | 39.5 (39.3 – 39.6)     | <0.001 |
| <b>Smoker</b> (yes)               | 21,177 (34.8%)         | 12,746 (36.6%)         | 8,431 (32.5%)          | <0.001 |
| <b>BMI</b> (kg/m <sup>2</sup> )   | 26.1 (26 – 26.1)       | 26.9 (26.8 – 26.9)     | 25.0 (25 – 25.1)       | <0.001 |
| <b>WC</b> (cm)                    | 82.9 (82.9 – 83.0)     | 88.6 (88.5 – 88.7)     | 75.4 (75.3 – 75.5)     | <0.001 |
| <b>WHtR</b>                       | 0.49 (0.49 – 0.49)     | 0.51 (0.50 – 0.51)     | 0.47 (0.46 – 0.47)     | <0.001 |
| <b>ABSI</b>                       | 0.07 (0.07 -0.07)      | 0.07 (0.07 -0.07)      | 0.07 (0.07 -0.07)      | <0.001 |
| <b>BF</b> (%)                     | 28.9 (28.9 – 29.0)     | 25.3 (25.3 – 25.4)     | 33.7 (33.6 – 37.8)     | <0.001 |
| <b>SBP</b> (mmHg)                 | 120.8 (120.6 -120.9)   | 125.4 (125.2 – 125.6)  | 114.6 (114.4 – 114.8)  | <0.001 |
| <b>DBP</b> (mmHg)                 | 73.6 (73.5 – 73.7)     | 76.0 (75.9 -76.1)      | 70.4 (70.3 – 70.5)     | <0.001 |
| <b>Glucose</b> (mg/dL)            | 88.3 (88.1- 88.5)      | 90.6 (90.4 – 90.8)     | 85.2 (85 – 85.4)       | <0.001 |
| <b>Cholesterol</b> (mg/dL)        | 195.2 (194.9 - 195.5)  | 196.9 (196.5 -197.3)   | 193.0 (192.6 – 193.4)  | <0.001 |
| <b>HDL-Cholesterol</b><br>(mg/dL) | 52.4 (52.3 - 52.5)     | 50.5 (50.4 – 50.6)     | 55.0 (54.9 – 55.1)     | <0.001 |
| <b>LDL-Cholesterol</b><br>(mg/dL) | 121.2 (120.9 - 121.5)  | 121.8 (121.4 – 126.2)  | 120.5 (120 – 120.9)    | <0.001 |
| <b>Triglycerides</b><br>(mg/dL)   | 109.3 (108.7 – 109.9)  | 125.3 (124.4 – 126.2)  | 88.8 (88.2 – 89.4)     | <0.001 |
| <b>MetS</b> (yes)                 | 5,587 (9.0%)           | 4,097 (11.8%)          | 1,390 (5.4%)           | <0.001 |

BMI: Body Mass Index; WC: Waist circumference; WHtR: Waist to Height Ratio; ABSI: A body Shape Index; BF (%): Body Fat percentage calculated according to the Deurenberg equation; SBP: Systolic Blood Pressure; DBP: Diastolic Blood Pressure; MetS: Metabolic syndrome. P<0.05 indicates significant differences between genders



**Table 2. Diagnostic test accuracy of NIM-MetS against NCEP-ATP III  
STANDARD REFERENCE NCEP APTIII**

|                                    |              | TOTAL              |        |        | MEN                |        |        | WOMEN              |        |        |
|------------------------------------|--------------|--------------------|--------|--------|--------------------|--------|--------|--------------------|--------|--------|
|                                    |              | Yes                | No     | Total  | Yes                | No     | Total  | Yes                | No     | Total  |
| <b>NIM – MetS</b><br>(n)           | <b>Yes</b>   | 3,001              | 2,850  | 5,851  | 2,433              | 2,300  | 4,733  | 568                | 550    | 1,118  |
|                                    | <b>No</b>    | 2,486              | 52,462 | 54,948 | 1,664              | 28,430 | 30,094 | 822                | 24,032 | 24,854 |
|                                    | <b>Total</b> | 5,487              | 55,312 | 60,799 | 4,097              | 30,730 | 34,827 | 1,390              | 24,582 | 25,972 |
| <b>Efficacy indicators, 95% CI</b> |              |                    |        |        |                    |        |        |                    |        |        |
| <b>Sensitivity</b>                 |              | 54.7 (53.4 – 56.0) |        |        | 59.4 (57.9 – 60.9) |        |        | 40.9 (38.2 – 43.5) |        |        |
| <b>Specificity</b>                 |              | 94.9 (94.7 – 95.0) |        |        | 92.5 (92.2 – 92.8) |        |        | 97.8 (97.6 – 98.0) |        |        |
| <b>PPV</b>                         |              | 51.3 (50 – 52.6)   |        |        | 51.4 (50.0 – 52.8) |        |        | 50.8 (47.8 – 53.8) |        |        |
| <b>NPV</b>                         |              | 95.5 (95 – 95.7)   |        |        | 94.5 (94.2 – 94.7) |        |        | 96.7 (96.5 – 96.9) |        |        |
| <b>VI</b>                          |              | 91.2 (91.0 – 91.5) |        |        | 88.6 (88.3 – 89.0) |        |        | 94.7 (94.4 – 95.0) |        |        |
| <b>LH +</b>                        |              | 10.6 (10.2 – 11.1) |        |        | 7.9 (7.6 – 8.3)    |        |        | 18.3 (16.5 – 20.3) |        |        |
| <b>LH -</b>                        |              | 0.48 (0.46 – 0.49) |        |        | 0.44 (0.42 – 0.46) |        |        | 0.60 (0.58 – 0.63) |        |        |
| <b>JI</b>                          |              | 0.50 (0.48 – 0.51) |        |        | 0.52 (0.50 – 0.53) |        |        | 0.39 (0.36 – 0.41) |        |        |

PPV: Positive Predictive Value; NPV: Negative Predictive Value; VI: Validity Index; LH +: Likelihood ratio positive; LH -: Likelihood ratio negative; JI: Youden Index.

**Table 3. Area under the curve (AUC) and cut-off values for WHtR according to gender and age groups**

| Age group (years) | n      | Prevalence of MetS (%) <sup>a</sup> | AUC 95% CI         | Cut-off value | Sensitivity (%) | Specificity (%) | JI   |
|-------------------|--------|-------------------------------------|--------------------|---------------|-----------------|-----------------|------|
| <b>MEN</b>        |        |                                     |                    |               |                 |                 |      |
| <b>20-30</b>      | 6,825  | 3.1                                 | 0.92 (0.9 – 0.95)  | 0.55          | 80.3            | 93.4            | 0.74 |
| <b>31-40</b>      | 11,623 | 7.5                                 | 0.88 (0.86 – 0.89) | 0.55          | 77.4            | 88.1            | 0.65 |
| <b>41-50</b>      | 10,080 | 14.9                                | 0.82 (0.81 – 0.83) | 0.56          | 66.4            | 87.7            | 0.54 |
| <b>≥51</b>        | 6,659  | 23.1                                | 0.75 (0.74 – 0.77) | 0.56          | 58.9            | 83.0            | 0.42 |
| <b>Total</b>      | 34,827 | 11.8                                | 0.84 (0.83 – 0.85) | 0.56          | 66.7            | 88.8            | 0.56 |
| <b>WOMEN</b>      |        |                                     |                    |               |                 |                 |      |
| <b>20-30</b>      | 5,715  | 1.1                                 | 0.90 (0.85 – 0.95) | 0.51          | 82.0            | 84.0            | 0.74 |
| <b>31-40</b>      | 8,529  | 2.7                                 | 0.91 (0.89 – 0.93) | 0.53          | 80.3            | 90.8            | 0.71 |
| <b>41-50</b>      | 7,641  | 6.6                                 | 0.91 (0.89 – 0.93) | 0.53          | 80.3            | 90.8            | 0.71 |
| <b>≥51</b>        | 4,087  | 14.4                                | 0.75 (0.73 – 0.77) | 0.55          | 48.4            | 90.5            | 0.39 |
| <b>Total</b>      | 25,972 | 5.4                                 | 0.85 (0.84 – 0.86) | 0.53          | 65.1            | 88.7            | 0.54 |
| <b>TOTAL</b>      |        |                                     |                    |               |                 |                 |      |
| <b>20-30</b>      | 12,540 | 2.1                                 | 0.92 (0.9 – 0.94)  | 0.53          | 84.4            | 90.1            | 0.75 |
| <b>31-40</b>      | 19,792 | 5.5                                 | 0.90 (0.89 – 0.91) | 0.54          | 78.2            | 88.5            | 0.67 |
| <b>41-50</b>      | 17,721 | 11.3                                | 0.83 (0.82 – 0.84) | 0.54          | 69.6            | 84.3            | 0.54 |
| <b>≥51</b>        | 10,746 | 19.8                                | 0.76 (0.75 – 0.77) | 0.56          | 57.0            | 85.3            | 0.42 |
| <b>Total</b>      | 60,799 | 9.0                                 | 0.85 (0.84 – 0.86) | 0.54          | 68.5            | 87.0            | 0.56 |

a: MetS according to NCEP ATP III criterion; AUC: area under the curve; JI: Youden Index

**Table 4. Probabilities of MetS (%) for nodes 3, 4, 5 and 6 in decision trees according to cut-off values of WtHR**

| WHtR range               | BP model        | Probabilities of MetS for nodes in the decision tree |        |        |        | Efficacy indicators for diagnostic test accuracy |                 |        |      |
|--------------------------|-----------------|------------------------------------------------------|--------|--------|--------|--------------------------------------------------|-----------------|--------|------|
|                          |                 | Node 3                                               | Node 4 | Node 5 | Node 6 | Sensitivity (%)                                  | Specificity (%) | VI (%) | JI   |
| <b>0.535</b>             | BP <sup>1</sup> | 0.3                                                  | 7.4    | 10.3   | 38.4   | 63.9                                             | 89.7            | 87.5   | 0.54 |
|                          | BP <sup>2</sup> | 0.5                                                  | 10.4   | 12.2   | 43.3   | 59.3                                             | 92.3            | 89.3   | 0.52 |
|                          | SBP             | 0.6                                                  | 10.5   | 13.7   | 43.3   | 57.0                                             | 92.6            | 89.4   | 0.5  |
| <b>0.540</b>             | BP <sup>1</sup> | 0.3                                                  | 7.6    | 11.5   | 40.7   | 62.7                                             | 90.9            | 88.4   | 0.54 |
|                          | BP <sup>2</sup> | 0.5                                                  | 10.5   | 13.5   | 45.7   | 57.8                                             | 93.2            | 90.0   | 0.51 |
|                          | SBP             | 0.6                                                  | 10.7   | 15.2   | 45.7   | 55.6                                             | 93.5            | 90.0   | 0.49 |
| <b>0.544<sup>a</sup></b> | BP <sup>1</sup> | 0.4                                                  | 7.7    | 12.5   | 42.8   | 61.6                                             | 91.8            | 89.1   | 0.53 |
|                          | BP <sup>2</sup> | 0.5                                                  | 10.9   | 14.6   | 48.0   | 56.7                                             | 93.9            | 90.5   | 0.51 |
|                          | SBP             | 0.6                                                  | 10.8   | 16.4   | 48.0   | 54.5                                             | 94.1            | 90.6   | 0.49 |
| <b>0.550<sup>b</sup></b> | BP <sup>1</sup> | 0.4                                                  | 7.9    | 14.2   | 46.1   | 59.6                                             | 93.1            | 90.1   | 0.53 |
|                          | BP <sup>2</sup> | 0.5                                                  | 10.9   | 16.6   | 51.3   | 54.7                                             | 94.8            | 91.2   | 0.46 |
|                          | SBP             | 0.7                                                  | 11.0   | 18.5   | 51.4   | 52.6                                             | 95.1            | 91.2   | 0.48 |
| <b>0.555</b>             | BP <sup>1</sup> | 0.4                                                  | 8.2    | 15.7   | 49.1   | 57.8                                             | 94.1            | 90.8   | 0.52 |
|                          | BP <sup>2</sup> | 0.6                                                  | 11.1   | 18.3   | 54.4   | 53.0                                             | 95.6            | 91.7   | 0.49 |
|                          | SBP             | 0.7                                                  | 11.3   | 20.3   | 54.5   | 51.0                                             | 95.8            | 91.7   | 0.47 |
| <b>0.560</b>             | BP <sup>1</sup> | 0.5                                                  | 8.5    | 17.0   | 51.8   | 55.7                                             | 94.9            | 91.3   | 0.51 |
|                          | BP <sup>2</sup> | 0.6                                                  | 11.5   | 19.9   | 57.1   | 51.0                                             | 96.2            | 92.1   | 0.47 |
|                          | SBP             | 0.8                                                  | 11.6   | 21.9   | 57.2   | 49.1                                             | 96.4            | 92.1   | 0.46 |
| <b>0.565</b>             | BP <sup>1</sup> | 0.5                                                  | 8.8    | 18.6   | 54.9   | 53.4                                             | 95.6            | 91.8   | 0.49 |
|                          | BP <sup>2</sup> | 0.6                                                  | 11.9   | 21.8   | 60.3   | 48.8                                             | 96.8            | 92.5   | 0.46 |
|                          | SBP             | 0.8                                                  | 12.0   | 23.9   | 60.4   | 47.0                                             | 96.9            | 92.4   | 0.44 |
| <b>0.570</b>             | BP <sup>1</sup> | 0.5                                                  | 9.1    | 19.9   | 57.4   | 51.4                                             | 96.2            | 92.2   | 0.48 |
|                          | BP <sup>2</sup> | 0.7                                                  | 12.3   | 23.3   | 62.8   | 46.9                                             | 97.2            | 92.7   | 0.44 |
|                          | SBP             | 0.9                                                  | 12.4   | 25.5   | 63.0   | 45.2                                             | 97.4            | 92.7   | 0.43 |

BP: Blood Pressure; BP<sup>1</sup>: Blood pressure ≥128/80 mmHg; BP<sup>2</sup>: Blood pressure ≥128/85 mmHg; SBP: Systolic blood pressure ≥128 mmHg; VI: Validity index; JI: Youden Index; a: Cut-off point for WHtR obtained in the total simple (n=60,799); b: Cut-off point proposed by NIM-MetS

1  
2  
3  
4  
5  
6  
7  
8  
9  
10  
11  
12  
13  
14  
15  
16  
17  
18  
19  
20  
21  
22  
23  
24  
25  
26  
27  
28  
29  
30  
31  
32  
33  
34  
35  
36  
37  
38  
39  
40  
41  
42  
43  
44  
45  
46  
47  
48  
49  
50  
51  
52  
53  
54  
55  
56  
57  
58  
59  
60

For peer review only

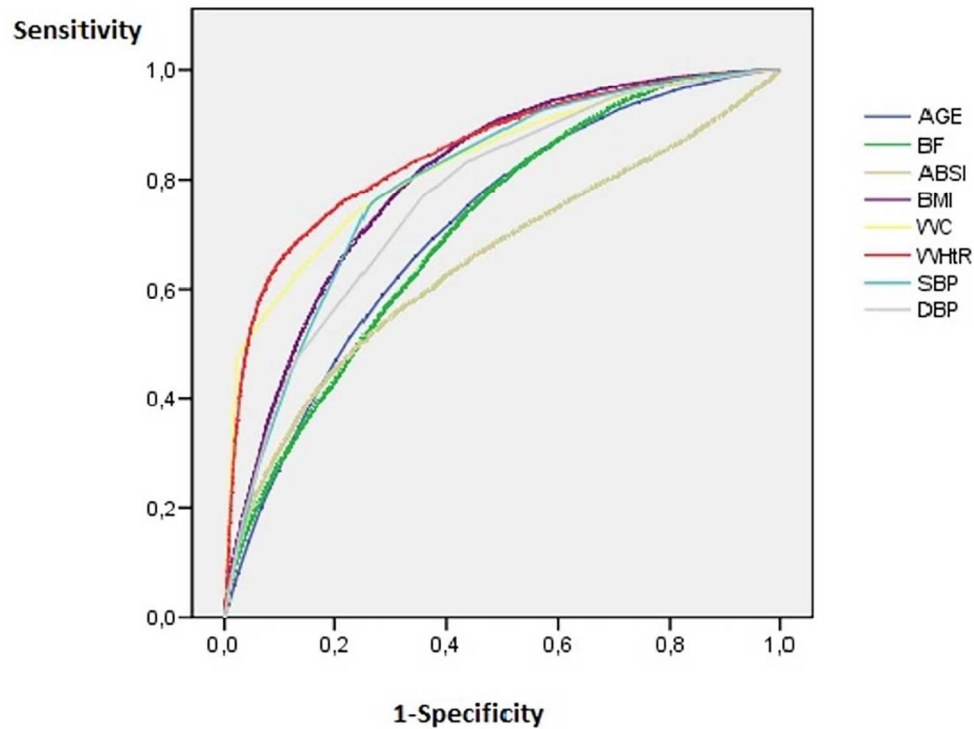

|             | AUC (95% CI)       | CP    | Sensitivity (%) | Specificity (%) | JI   |
|-------------|--------------------|-------|-----------------|-----------------|------|
| <b>Age</b>  | 0.71 (0.71 - 0.72) | 42.5  | 69.2            | 62.5            | 0.32 |
| <b>WHtR</b> | 0.85 (0.84 - 0.86) | 0.54  | 68.5            | 87.0            | 0.56 |
| <b>WC</b>   | 0.83 (0.82 - 0.84) | 89.1  | 72.5            | 77.6            | 0.50 |
| <b>BMI</b>  | 0.8 (0.8 - 0.81)   | 27.1  | 78.4            | 68.3            | 0.47 |
| <b>ABSI</b> | 0.65 (0.64 - 0.66) | 0.07  | 50.4            | 75.2            | 0.26 |
| <b>BF%</b>  | 0.71 (0.7 - 0.72)  | 29.4  | 70.9            | 58.1            | 0.3  |
| <b>SBP</b>  | 0.79 (0.79 - 0.8)  | 127.5 | 75.8            | 73.5            | 0.49 |
| <b>DBP</b>  | 0.77 (0.76 - 0.78) | 78.5  | 77.3            | 63.9            | 0.41 |

AUC: Area under curve CP: Cut-off point; JI: Youden Index; BMI: Body mass index; WC: Waist circumference; WHtR: Waist to height ratio; ABSI: A Body Shape Index; BF (%): Body Fat calculated according to the Deurenberg equation; SBP: Systolic Blood Pressure; DBP: Diastolic Blood Pressure.

Figure 1

96x112mm (300 x 300 DPI)



Figure 2

170x98mm (300 x 300 DPI)

Review only



Figure 3

274x183mm (300 x 300 DPI)

STROBE Statement—Checklist of items that should be included in reports of *cross-sectional studies*

|                              | Item No | Recommendation                                                                                                                                                                                    | Checked in page |
|------------------------------|---------|---------------------------------------------------------------------------------------------------------------------------------------------------------------------------------------------------|-----------------|
| <b>Title and abstract</b>    | 1       | (a) Indicate the study's design with a commonly used term in the title or the abstract                                                                                                            | 2               |
|                              |         | (b) Provide in the abstract an informative and balanced summary of what was done and what was found                                                                                               | 2               |
| <b>Introduction</b>          |         |                                                                                                                                                                                                   |                 |
| Background/rationale         | 2       | Explain the scientific background and rationale for the investigation being reported                                                                                                              | 4               |
| Objectives                   | 3       | State specific objectives, including any prespecified hypotheses                                                                                                                                  | 5               |
| <b>Methods</b>               |         |                                                                                                                                                                                                   |                 |
| Study design                 | 4       | Present key elements of study design early in the paper                                                                                                                                           | 6               |
| Setting                      | 5       | Describe the setting, locations, and relevant dates, including periods of recruitment, exposure, follow-up, and data collection                                                                   | 6               |
| Participants                 | 6       | (a) Give the eligibility criteria, and the sources and methods of selection of participants                                                                                                       | 6-7-8           |
| Variables                    | 7       | Clearly define all outcomes, exposures, predictors, potential confounders, and effect modifiers. Give diagnostic criteria, if applicable                                                          | 7-8             |
| Data sources/<br>measurement | 8*      | For each variable of interest, give sources of data and details of methods of assessment (measurement). Describe comparability of assessment methods if there is more than one group              | 7               |
| Bias                         | 9       | Describe any efforts to address potential sources of bias                                                                                                                                         | 7-8             |
| Study size                   | 10      | Explain how the study size was arrived at                                                                                                                                                         | 6               |
| Quantitative<br>variables    | 11      | Explain how quantitative variables were handled in the analyses. If applicable, describe which groupings were chosen and why                                                                      | 6-7-8           |
| Statistical methods          | 12      | (a) Describe all statistical methods, including those used to control for confounding                                                                                                             | 9               |
|                              |         | (b) Describe any methods used to examine subgroups and interactions                                                                                                                               | 9               |
|                              |         | (c) Explain how missing data were addressed                                                                                                                                                       |                 |
|                              |         | (d) If applicable, describe analytical methods taking account of sampling strategy                                                                                                                | 9               |
|                              |         | (e) Describe any sensitivity analyses                                                                                                                                                             | 9               |
| <b>Results</b>               |         |                                                                                                                                                                                                   |                 |
| Participants                 | 13*     | (a) Report numbers of individuals at each stage of study—eg numbers potentially eligible, examined for eligibility, confirmed eligible, included in the study, completing follow-up, and analysed | 11              |
|                              |         | (b) Give reasons for non-participation at each stage                                                                                                                                              | 11              |
|                              |         | (c) Consider use of a flow diagram                                                                                                                                                                | Not necessary   |
| Descriptive data             | 14*     | (a) Give characteristics of study participants (eg demographic, clinical, social) and information on exposures and potential confounders                                                          | 11-12           |
|                              |         | (b) Indicate number of participants with missing data for each variable of interest                                                                                                               | none            |
| Outcome data                 | 15*     | Report numbers of outcome events or summary measures                                                                                                                                              | 11-12-13        |
| Main results                 | 16      | (a) Give unadjusted estimates and, if applicable, confounder-adjusted                                                                                                                             | 12-13-14        |



|                          |    |                                                                                                                                                                            |               |
|--------------------------|----|----------------------------------------------------------------------------------------------------------------------------------------------------------------------------|---------------|
|                          |    | estimates and their precision (eg, 95% confidence interval). Make clear which confounders were adjusted for and why they were included                                     |               |
|                          |    | (b) Report category boundaries when continuous variables were categorized                                                                                                  | 13-14         |
|                          |    | (c) If relevant, consider translating estimates of relative risk into absolute risk for a meaningful time period                                                           | Not indicated |
| Other analyses           | 17 | Report other analyses done—eg analyses of subgroups and interactions, and sensitivity analyses                                                                             | 11-14         |
| <b>Discussion</b>        |    |                                                                                                                                                                            |               |
| Key results              | 18 | Summarise key results with reference to study objectives                                                                                                                   | 16-17-18      |
| Limitations              | 19 | Discuss limitations of the study, taking into account sources of potential bias or imprecision. Discuss both direction and magnitude of any potential bias                 | 18            |
| Interpretation           | 20 | Give a cautious overall interpretation of results considering objectives, limitations, multiplicity of analyses, results from similar studies, and other relevant evidence | 16-17         |
| Generalisability         | 21 | Discuss the generalisability (external validity) of the study results                                                                                                      | 17-18         |
| <b>Other information</b> |    |                                                                                                                                                                            |               |
| Funding                  | 22 | Give the source of funding and the role of the funders for the present study and, if applicable, for the original study on which the present article is based              | 20            |

\*Give information separately for exposed and unexposed groups.

**Note:** An Explanation and Elaboration article discusses each checklist item and gives methodological background and published examples of transparent reporting. The STROBE checklist is best used in conjunction with this article (freely available on the Web sites of PLoS Medicine at <http://www.plosmedicine.org/>, Annals of Internal Medicine at <http://www.annals.org/>, and Epidemiology at <http://www.epidem.com/>). Information on the STROBE Initiative is available at [www.strobe-statement.org](http://www.strobe-statement.org).

| Section & Topic          | No  | Item                                                                                                                                                   | Checked in page |
|--------------------------|-----|--------------------------------------------------------------------------------------------------------------------------------------------------------|-----------------|
| <b>TITLE OR ABSTRACT</b> |     |                                                                                                                                                        |                 |
|                          | 1   | Identification as a study of diagnostic accuracy using at least one measure of accuracy (such as sensitivity, specificity, predictive values, or AUC)  | 2               |
| <b>ABSTRACT</b>          |     |                                                                                                                                                        |                 |
|                          | 2   | Structured summary of study design, methods, results, and conclusions (for specific guidance, see STARD for Abstracts)                                 | 2               |
| <b>INTRODUCTION</b>      |     |                                                                                                                                                        |                 |
|                          | 3   | Scientific and clinical background, including the intended use and clinical role of the index test                                                     | 4               |
|                          | 4   | Study objectives and hypotheses                                                                                                                        | 4-5             |
| <b>METHODS</b>           |     |                                                                                                                                                        |                 |
| <i>Study design</i>      | 5   | Whether data collection was planned before the index test and reference standard were performed (prospective study) or after (retrospective study)     | 6               |
| <i>Participants</i>      | 6   | Eligibility criteria                                                                                                                                   | 6               |
|                          | 7   | On what basis potentially eligible participants were identified (such as symptoms, results from previous tests, inclusion in registry)                 | 6               |
|                          | 8   | Where and when potentially eligible participants were identified (setting, location and dates)                                                         | 6               |
|                          | 9   | Whether participants formed a consecutive, random or convenience series                                                                                | 6               |
| <i>Test methods</i>      | 10a | Index test, in sufficient detail to allow replication                                                                                                  | 7               |
|                          | 10b | Reference standard, in sufficient detail to allow replication                                                                                          | 7               |
|                          | 11  | Rationale for choosing the reference standard (if alternatives exist)                                                                                  |                 |
|                          | 12a | Definition of and rationale for test positivity cut-offs or result categories of the index test, distinguishing pre-specified from exploratory         | 8               |
|                          | 12b | Definition of and rationale for test positivity cut-offs or result categories of the reference standard, distinguishing pre-specified from exploratory | 8               |
|                          | 13a | Whether clinical information and reference standard results were available to the performers/readers of the index test                                 | 8-9             |
|                          | 13b | Whether clinical information and index test results were available to the assessors of the reference standard                                          | 8-9             |
| <i>Analysis</i>          | 14  | Methods for estimating or comparing measures of diagnostic accuracy                                                                                    | 9-10            |
|                          | 15  | How indeterminate index test or reference standard results were handled                                                                                | 9-10            |
|                          | 16  | How missing data on the index test and reference standard were handled                                                                                 | 9-10            |
|                          | 17  | Any analyses of variability in diagnostic accuracy, distinguishing pre-specified from exploratory                                                      |                 |
|                          | 18  | Intended sample size and how it was determined                                                                                                         | 6               |
| <b>RESULTS</b>           |     |                                                                                                                                                        |                 |
| <i>Participants</i>      | 19  | Flow of participants, using a diagram                                                                                                                  | Not indicated   |
|                          | 20  | Baseline demographic and clinical characteristics of participants                                                                                      | 11              |
|                          | 21a | Distribution of severity of disease in those with the target condition                                                                                 | 11-12           |
|                          | 21b | Distribution of alternative diagnoses in those without the target condition                                                                            | 11-12           |
|                          | 22  | Time interval and any clinical interventions between index test and reference standard                                                                 | Not necessary   |
| <i>Test results</i>      | 23  | Cross tabulation of the index test results (or their distribution) by the results of the reference standard                                            | 12              |
|                          | 24  | Estimates of diagnostic accuracy and their precision (such as 95% confidence intervals)                                                                | 12              |
|                          | 25  | Any adverse events from performing the index test or the reference standard                                                                            | None            |
| <b>DISCUSSION</b>        |     |                                                                                                                                                        |                 |
|                          | 26  | Study limitations, including sources of potential bias, statistical uncertainty, and generalisability                                                  | 17-18           |
|                          | 27  | Implications for practice, including the intended use and clinical role of the index test                                                              | 17-18-19        |
| <b>OTHER INFORMATION</b> |     |                                                                                                                                                        |                 |
|                          | 28  | Registration number and name of registry                                                                                                               |                 |
|                          | 29  | Where the full study protocol can be accessed                                                                                                          |                 |
|                          | 30  | Sources of funding and other support; role of funders                                                                                                  | 20              |

# STARD 2015

---

## AIM

STARD stands for “Standards for Reporting Diagnostic accuracy studies”. This list of items was developed to contribute to the completeness and transparency of reporting of diagnostic accuracy studies. Authors can use the list to write informative study reports. Editors and peer-reviewers can use it to evaluate whether the information has been included in manuscripts submitted for publication.

---

## EXPLANATION

A **diagnostic accuracy study** evaluates the ability of one or more medical tests to correctly classify study participants as having a **target condition**. This can be a disease, a disease stage, response or benefit from therapy, or an event or condition in the future. A medical test can be an imaging procedure, a laboratory test, elements from history and physical examination, a combination of these, or any other method for collecting information about the current health status of a patient.

The test whose accuracy is evaluated is called **index test**. A study can evaluate the accuracy of one or more index tests. Evaluating the ability of a medical test to correctly classify patients is typically done by comparing the distribution of the index test results with those of the **reference standard**. The reference standard is the best available method for establishing the presence or absence of the target condition. An accuracy study can rely on one or more reference standards.

If test results are categorized as either positive or negative, the cross tabulation of the index test results against those of the reference standard can be used to estimate the **sensitivity** of the index test (the proportion of participants *with* the target condition who have a positive index test), and its **specificity** (the proportion *without* the target condition who have a negative index test). From this cross tabulation (sometimes referred to as the contingency or “2x2” table), several other accuracy statistics can be estimated, such as the positive and negative **predictive values** of the test. Confidence intervals around estimates of accuracy can then be calculated to quantify the statistical **precision** of the measurements.

If the index test results can take more than two values, categorization of test results as positive or negative requires a **test positivity cut-off**. When multiple such cut-offs can be defined, authors can report a receiver operating characteristic (ROC) curve which graphically represents the combination of sensitivity and specificity for each possible test positivity cut-off. The **area under the ROC curve** informs in a single numerical value about the overall diagnostic accuracy of the index test.

The **intended use** of a medical test can be diagnosis, screening, staging, monitoring, surveillance, prediction or prognosis. The **clinical role** of a test explains its position relative to existing tests in the clinical pathway. A replacement test, for example, replaces an existing test. A triage test is used before an existing test; an add-on test is used after an existing test.

Besides diagnostic accuracy, several other outcomes and statistics may be relevant in the evaluation of medical tests. Medical tests can also be used to classify patients for purposes other than diagnosis, such as staging or prognosis. The STARD list was not explicitly developed for these other outcomes, statistics, and study types, although most STARD items would still apply.

---

## DEVELOPMENT

This STARD list was released in 2015. The 30 items were identified by an international expert group of methodologists, researchers, and editors. The guiding principle in the development of STARD was to select items that, when reported, would help readers to judge the potential for bias in the study, to appraise the applicability of the study findings and the validity of conclusions and recommendations. The list represents an update of the first version, which was published in 2003.

More information can be found on <http://www.equator-network.org/reporting-guidelines/stard>.



Supplement: bmjopen-2017-020476.draft_revisions.pdf [file bmjopen-2017-020476.draft_revisions.pdf]
